# Supplementary material for: Titanocene pnictinidene complexes
Source: Royal Society of Chemistry journal article supplement (doi:10.1039/d1cc01305j), 2021-01-01
Supplement: d1cc01305j1.pdf [file d1cc01305j1.pdf]

## SUPPORTING INFORMATION

### Titanocene Pnictinidene Complexes

Dr. Malte Fischer, Dr. Fabian Reiß, Dr. Christian Hering-Junghans

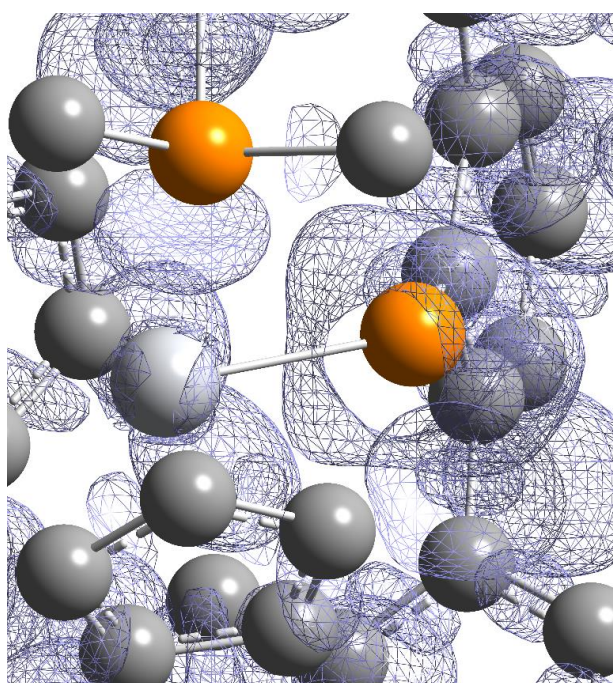

#### This file includes:

|   |                                                                                                                        |    |
|---|------------------------------------------------------------------------------------------------------------------------|----|
| 1 | Experimental.....                                                                                                      | 2  |
| 2 | Structure elucidation.....                                                                                             | 4  |
| 3 | Attempted Syntheses of $\text{Cp}_2\text{Ti}(\text{PMe}_3)\text{PR}$ ( $\text{R} = \text{Mes}^*, \text{DipTer}$ )..... | 11 |
| 4 | Syntheses of compounds .....                                                                                           | 15 |
| 5 | Computational details.....                                                                                             | 26 |
| 6 | References.....                                                                                                        | 63 |

# 1 Experimental

**General Information.** If not stated otherwise, all manipulations were performed under oxygen- and moisture-free conditions under an inert atmosphere of argon using standard Schlenk techniques or an inert atmosphere glovebox (MBraun LABstar ECO). All glassware was heated three times *in vacuo* using a heat gun and cooled under argon atmosphere. Solvents were transferred using syringes, steel- or PE-cannulas, which were purged with argon prior to use. Solvents and reactants were either obtained from commercial sources or synthesized as detailed in Table S1.

**Table S1:** Origin and purification of solvents and reactants.

| Substance                                                                          | Origin                                                 | Purification                                                                                                                    |
|------------------------------------------------------------------------------------|--------------------------------------------------------|---------------------------------------------------------------------------------------------------------------------------------|
| Benzene                                                                            | local trade                                            | dried over Na/benzophenone<br>freshly distilled prior to use, stored over molecular sieves.                                     |
| <i>n</i> -pentane                                                                  | local trade                                            | dried over Na/benzophenone/tetraglyme<br>freshly distilled prior to use                                                         |
| THF                                                                                | Sigma Aldrich, inhibitor-free, for HPLC, $\geq 99.9\%$ | purified with the Grubbs-type column system<br>"Pure Solv MD-5"<br>dried over Na/benzophenone<br>freshly distilled prior to use |
| C <sub>6</sub> D <sub>6</sub>                                                      | euriso-top                                             | dried over Na/benzophenone<br>freshly distilled prior to use                                                                    |
| C <sub>7</sub> D <sub>8</sub> (toluene-d <sub>8</sub> )                            | euriso-top                                             | dried over Na/benzophenone<br>freshly distilled prior to use                                                                    |
| Cp <sub>2</sub> Ti(C <sub>2</sub> (SiMe <sub>3</sub> ) <sub>2</sub> ) <sup>1</sup> | synthesized                                            |                                                                                                                                 |
| <sup>Dip</sup> TerPPMe <sub>3</sub> <sup>2</sup>                                   | synthesized                                            |                                                                                                                                 |
| <sup>Dip</sup> TerAsPMe <sub>3</sub> <sup>3</sup>                                  | synthesized                                            |                                                                                                                                 |
| <sup>Mes</sup> TerPPMe <sub>3</sub> <sup>2</sup>                                   | synthesized                                            |                                                                                                                                 |
| Mes*PPMe <sub>3</sub> <sup>2</sup>                                                 | synthesized                                            |                                                                                                                                 |

**NMR spectra** were recorded on Bruker spectrometers (AVANCE 300, AVANCE 400 or Fourier 300) and were referenced internally to the deuterated solvent ( $^{13}\text{C}$ :  $\text{C}_6\text{D}_6$   $\delta_{\text{ref}} = 128.06$  ppm;  $\text{C}_7\text{D}_8$   $\delta_{\text{ref}} = 20.43$  ppm) or to protic impurities in the deuterated solvent ( $^1\text{H}$ :  $\text{C}_6\text{HD}_5$   $\delta_{\text{ref}} = 7.16$  ppm;  $\text{C}_7\text{D}_8$   $\delta_{\text{ref}} = 2.08$  ppm). All measurements were carried out at ambient temperature unless denoted otherwise. NMR signals were assigned using experimental data (e.g. chemical shifts, coupling constants, integrals where applicable).

**Elemental analyses** were obtained using a Leco Tru Spec elemental analyzer.

**Mass spectra** were recorded on a Thermo Electron MAT 95-XP sector field mass spectrometer using crystalline samples.

**UV-Vis** analysis was performed using an *analytikjena specord s 600* diode array photometer. The samples were dissolved in THF in a drybox in a 1 cm quartz cuvette with a Schlenk-Valve. If necessary, the samples were diluted using Schlenk techniques.

## 2 Structure elucidation

**X-ray Structure Determination:** X-ray quality crystals of **3** and **5** were selected in Fomblin© Y perfluoroether (Sigma Aldrich) at  $-30\text{ }^{\circ}\text{C}$  under a constant stream of nitrogen. X-ray quality crystals of **6\_i** and **6\_ii** were selected in Fomblin© Y-1800 perfluoroether (Alfa Aesar) at room temperature. The samples were cooled to 150(2) K during measurement. The data were collected on a Bruker Kappa Apex II diffractometer using Mo  $K_{\alpha}$  radiation ( $\lambda = 0.71073\text{ \AA}$ ) or Cu  $K_{\alpha}$  radiation ( $\lambda = 1.54178\text{ \AA}$ ). The structures were solved by iterative methods (SHELXT)<sup>4</sup> and refined by full matrix least squares procedures (SHELXL).<sup>5</sup> Semi-empirical absorption corrections were applied (SADABS).<sup>6</sup> All non-hydrogen atoms were refined anisotropically, hydrogen atoms were included in the refinement at calculated positions using a riding model.

The structure of **3** was refined as a two-component twin.

In the asymmetric unit of **5** eight severely disordered n-hexane molecules were found. These solvent molecules have been treated as a diffuse contribution to the overall scattering by using PLATON/SQUEEZE.<sup>7</sup>

For **6** two modifications could be obtained. In **6\_ii** the central As<sub>2</sub> unit was found to be disordered and was split in two parts. The occupancy of each part was allowed to refine freely.

**Table S2:** Crystallographic details of **3**, **5** and **6\_i**.

| Compound                                                                                          | <b>3</b>                                          | <b>5</b>                                                                                     | <b>6_i</b>                                      |
|---------------------------------------------------------------------------------------------------|---------------------------------------------------|----------------------------------------------------------------------------------------------|-------------------------------------------------|
| Chem. Formula                                                                                     | C <sub>37</sub> H <sub>44</sub> P <sub>2</sub> Ti | C <sub>43</sub> H <sub>56</sub> PA <sub>2</sub> Ti<br>1.33 (C <sub>6</sub> H <sub>14</sub> ) | C <sub>60</sub> H <sub>74</sub> As <sub>2</sub> |
| Formula weight [g/mol]                                                                            | 598.56                                            | 841.56                                                                                       | 945.03                                          |
| Colour                                                                                            | black                                             | brown                                                                                        | yellow                                          |
| Crystal system                                                                                    | monoclinic                                        | triclinic                                                                                    | monoclinic                                      |
| Space group                                                                                       | <i>P</i> 2 <sub>1</sub> / <i>c</i>                | <i>P</i> -1                                                                                  | <i>C</i> 2/ <i>c</i>                            |
| <i>a</i> [Å]                                                                                      | 16.6969(8)                                        | 17.7808(5)                                                                                   | 21.4486(15)                                     |
| <i>b</i> [Å]                                                                                      | 10.4621(5)                                        | 19.3646(5)                                                                                   | 14.9005(10)                                     |
| <i>c</i> [Å]                                                                                      | 18.3000(8)                                        | 21.7658(5)                                                                                   | 16.0230(11)                                     |
| $\alpha$ [°]                                                                                      | 90                                                | 79.424(2)                                                                                    | 90                                              |
| $\beta$ [°]                                                                                       | 99.112(2)                                         | 81.436(2)                                                                                    | 95.2270(13)                                     |
| $\gamma$ [°]                                                                                      | 90                                                | 89.781(2)                                                                                    | 90                                              |
| <i>V</i> [Å <sup>3</sup> ]                                                                        | 3156.4(3))                                        | 7282.8(3)                                                                                    | 5099.6(6)                                       |
| <i>Z</i>                                                                                          | 4                                                 | 6                                                                                            | 4                                               |
| $\rho_{\text{calcd.}}$ [g/cm <sup>3</sup> ]                                                       | 1.260                                             | 1.151                                                                                        | 1.231                                           |
| $\mu$ [mm <sup>-1</sup> ]                                                                         | 3.424                                             | 2.716                                                                                        | 1.347                                           |
| <i>T</i> [K]                                                                                      | 150(2)                                            | 150(2)                                                                                       | 150(2)                                          |
| Measured reflections                                                                              | 26770                                             | 103642                                                                                       | 38522                                           |
| Independent reflections                                                                           | 5650                                              | 24760                                                                                        | 7447                                            |
| Reflections with <i>I</i> > 2 $\sigma$ ( <i>I</i> )                                               | 5490                                              | 18627                                                                                        | 5712                                            |
| <i>R</i> <sub>int</sub>                                                                           | 0.0375                                            | 0.0609                                                                                       | 0.0334                                          |
| <i>F</i> (000)                                                                                    | 1272                                              | 2704                                                                                         | 2000                                            |
| <i>R</i> <sub>1</sub> ( <i>R</i> [ <i>F</i> <sup>2</sup> > 2 $\sigma$ ( <i>F</i> <sup>2</sup> )]) | 0.0311                                            | 0.0505                                                                                       | 0.0315                                          |
| <i>wR</i> <sub>2</sub> ( <i>F</i> <sup>2</sup> )                                                  | 0.0870                                            | 0.1423                                                                                       | 0.0836                                          |
| GooF                                                                                              | 1.057                                             | 1.025                                                                                        | 1.024                                           |
| No. of Parameters                                                                                 | 371                                               | 1317                                                                                         | 288                                             |
| CCDC #                                                                                            | 2060154                                           | 2060155                                                                                      | 2060156                                         |

**Table S3:** Crystallographic details of **6\_ii**.

| Compound                                                                                 | <b>6_ii</b>                                                                        |
|------------------------------------------------------------------------------------------|------------------------------------------------------------------------------------|
| Chem. Formula                                                                            | C <sub>60</sub> H <sub>74</sub> As <sub>2</sub> ·2(C <sub>6</sub> H <sub>6</sub> ) |
| Formula weight [g/mol]                                                                   | 1101.24                                                                            |
| Colour                                                                                   | orange                                                                             |
| Crystal system                                                                           | Triclinic                                                                          |
| Space group                                                                              | <i>P</i> -1                                                                        |
| <i>a</i> [Å]                                                                             | 13.2848(10)                                                                        |
| <i>b</i> [Å]                                                                             | 14.6046(12)                                                                        |
| <i>c</i> [Å]                                                                             | 16..1967(13)                                                                       |
| $\alpha$ [°]                                                                             | 97.9377(29)                                                                        |
| $\beta$ [°]                                                                              | 97.4838(28)                                                                        |
| $\gamma$ [°]                                                                             | 96.5107(29)                                                                        |
| <i>V</i> [Å <sup>3</sup> ]                                                               | 3058.1(4)                                                                          |
| <i>Z</i>                                                                                 | 2                                                                                  |
| $\rho_{\text{calcd.}}$ [g/cm <sup>3</sup> ]                                              | 1.196                                                                              |
| $\mu$ [mm <sup>-1</sup> ]                                                                | 1.133                                                                              |
| <i>T</i> [K]                                                                             | 150(2)                                                                             |
| Measured reflections                                                                     | 102903                                                                             |
| Independent reflections                                                                  | 16266                                                                              |
| Reflections with $I > 2\sigma(I)$                                                        | 14004                                                                              |
| <i>R</i> <sub>int</sub>                                                                  | 0.0301                                                                             |
| <i>F</i> (000)                                                                           | 1168                                                                               |
| <i>R</i> <sub>1</sub> ( <i>R</i> [ <i>F</i> <sup>2</sup> > 2σ( <i>F</i> <sup>2</sup> )]) | 0.0297                                                                             |
| <i>wR</i> <sub>2</sub> ( <i>F</i> <sup>2</sup> )                                         | 0.0800                                                                             |
| GooF                                                                                     | 1.036                                                                              |
| No. of Parameters                                                                        | 739                                                                                |
| CCDC #                                                                                   | 2060157                                                                            |

**Figure S1:** Molecular structure of **3**. ORTEPs drawn at 50% probability, all H-atoms omitted and Mes-groups rendered as wireframe for clarity. Selected bond lengths (Å) and angles (°) of **3**: C1–P1 1.8417(18), Ti1–P1 2.4225(6), Ti1–P2 2.5688(6), Ti1–Ct1 2.0491(3), Ti1–Ct2 2.0770(3); C1–P1–Ti1 122.12(6), P1–Ti1–P2 86.823(19), Ct1–Ti1–Ct2 135.374(18), Ct2–Ti1–P1 111.213(17), Ct1–Ti1–P2 105.424(19), Ct2–Ti1–P1 104.007(17), Ct2–Ti1–P2 102.986(18); C6–C1–P1–Ti1 –2.05(18).

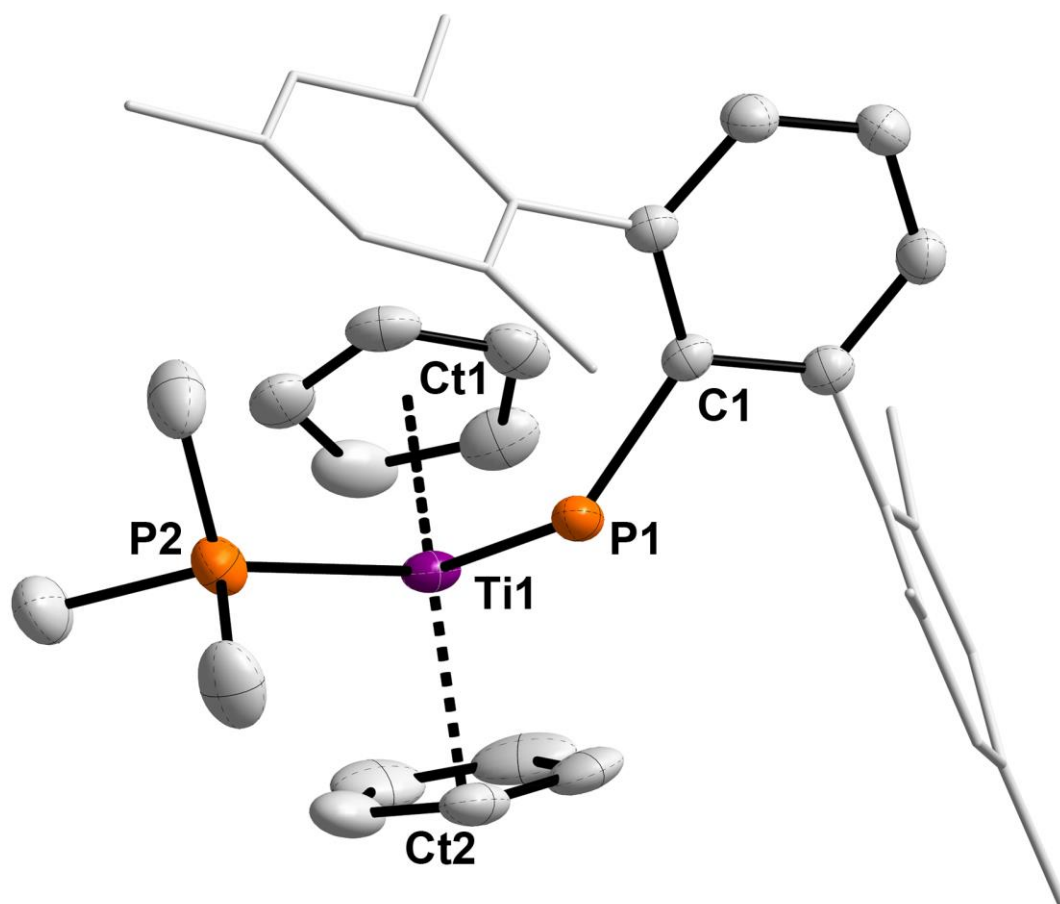

**Figure S2:** Molecular structure of **5** showing all three independent molecules in the asymmetric unit. ORTEPs drawn at 30% probability, all H-atoms omitted and Dip-groups rendered as wireframe for clarity. Selected bond lengths (Å) and angles (°) of **5**: (1) C1–As1 1.989(3), Ti1–As1 2.4726(8), Ti1–P1 2.5545(11), Ti1–Ct1 2.0585(6), Ti1–Ct2 2.0292(7); C1–As1–Ti1 121.73(10), P1–Ti1–As1 88.05(3), Ct1–Ti1–Ct2 136.128(35), Ct2–Ti1–As1 109.337(30), Ct1–Ti1–P1 104.260(34), Ct2–Ti1–As1 103.156(26), Ct2–Ti1–P1 105.498(34); Ti1–As1–C1–C2 –97.723(246); (2) C44–As2 1.985(3), Ti2–As2 2.4638(9), Ti2–P2A 2.549(3), Ti2–Ct3 2.0702(6), Ti2–Ct4 2.0300(7); C44–As2–Ti2 121.63(9), As2–Ti2–P2A 92.49(18), Ct3–Ti2–Ct4 136.251(37), Ct4–Ti2–P2A 101.949(104), Ct3–Ti2–As2 102.878(27), Ct3–Ti2–P2A 105.817(89), Ct4–Ti2–As2 109.015(34); Ti2–As2–C43–C44 –99.118(280); (3) C87–As3 2.008(4), Ti3–As3 2.4659(9), Ti3–P3 2.5526(13), Ti3–Ct5 2.0698(6), Ti3–Ct6 2.0218(6); C87–As3–Ti3 123.22(11), P3–Ti3–As3 89.31(4), Ct5–Ti3–Ct6 135.590(33), Ct6–Ti3–As3 108.447(29), Ct5–Ti3–P3 104.525(38), Ct5–Ti3–As3 103.880(31), Ct6–Ti3–P3 105.475(38); Ti3–As3–C87–C88 –94.946(277).

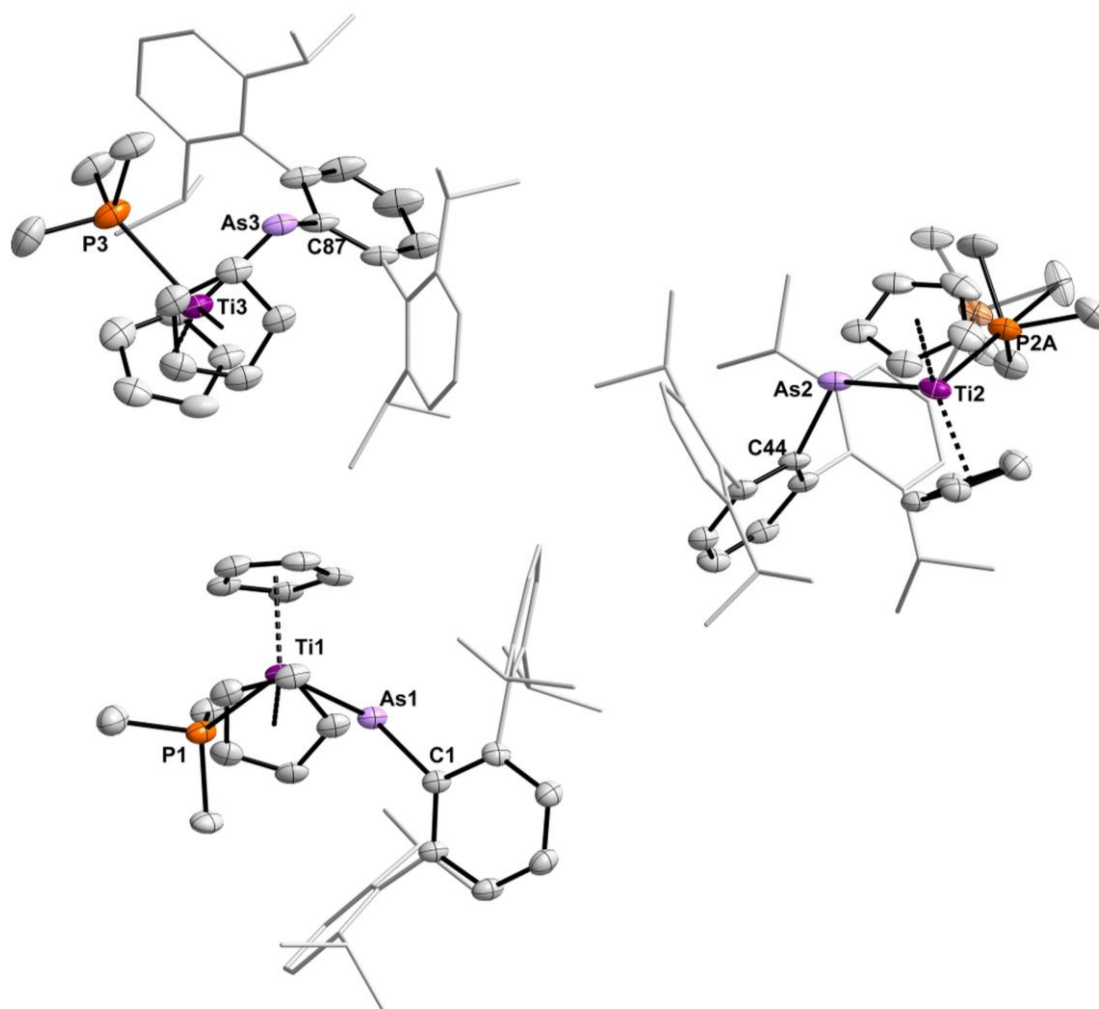

**Figure S3:** Molecular structure of **6\_i**. ORTEPs drawn at 50% probability, all H-atoms omitted and Dip-groups rendered as wireframe for clarity. The molecule lies on an inversion center. Labels with added prime indicate symmetry equivalent positions ( $3/2-x, 3/2-y, 1-z$ ). Selected bond lengths (Å) and angles (°) of **6\_i**: C1–As1 1.9901(13), As1–As1' 2.2679(3); C1–As1–As1' 101.15(4); C2–C1–As1–As1' –95.725(109).

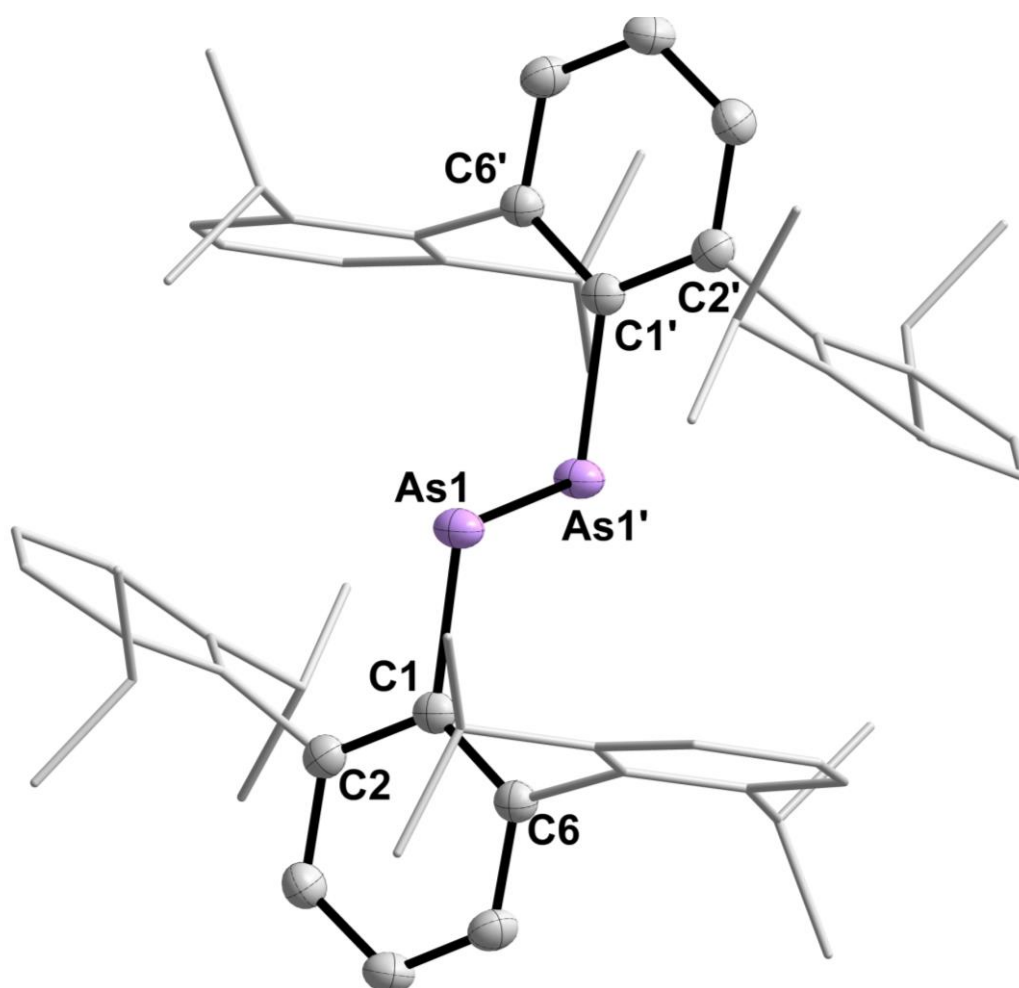

**Figure S4:** Molecular structure of **6\_ii**. ORTEPs drawn at 50% probability, all H-atoms and two benzene molecules associated with **6\_ii** omitted and Mes-groups rendered as wireframe for clarity. The occupancy of the major orientation is 0.9438(13), whereas the minor orientation is 0.0562(13). Selected bond lengths (Å) and angles (°) of **3**: C1–As1A 1.9929(12), C31–As2A 1.9764(12), As1A–As2A 2.2659(3), As1B–As2B 2.355(6); C1–As1A–As2A 96.61(3), C31–As2A–As1A 108.62(4); C6–C1–As1A–As2A 78.869(98), C32–C31–As2A–As1A –16.112(116).

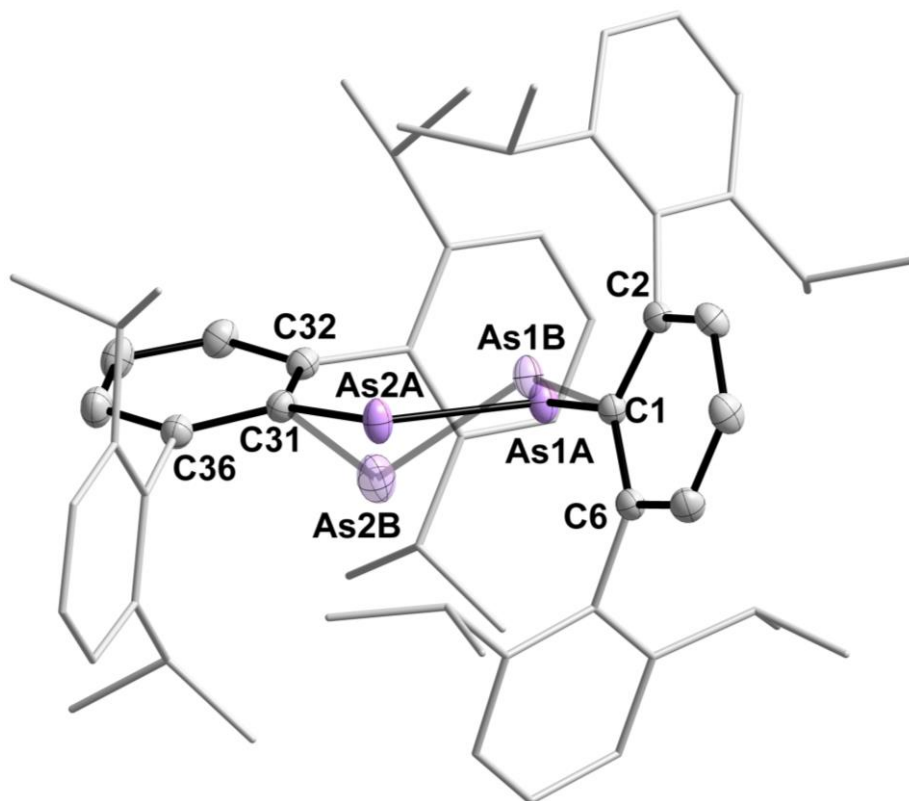

### 3 Attempted Syntheses of $\text{Cp}_2\text{Ti}(\text{PMe}_3)\text{PR}$ ( $\text{R} = \text{Mes}^*, \text{DipTer}$ )

#### 3.1 Attempted Synthesis of $\text{Cp}_2\text{Ti}(\text{PMe}_3)\text{PMes}^*$

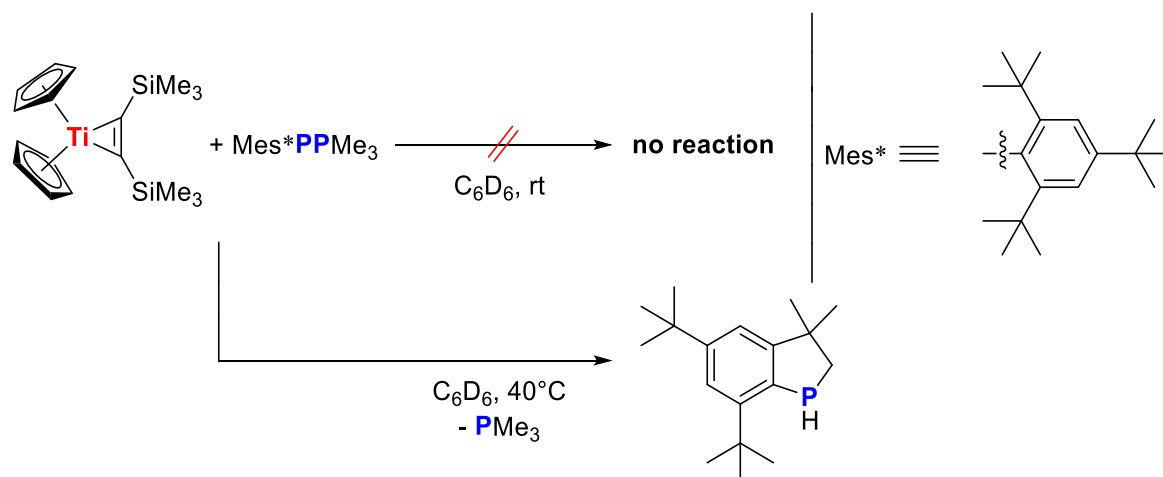

In a Young NMR tube  $\text{Cp}_2\text{Ti}(\text{btmsa})$  (**1**) (0.022 g, 0.063 mmol) and  $\text{Mes}^*\text{PPMe}_3$  (**2a**) (0.022 g, 0.063 mmol) were dissolved in 0.6 mL of  $\text{C}_6\text{D}_6$ . The reaction mixture was allowed to stand for 16 h at room temperature. Regular control by  $^1\text{H}$  and  $^{31}\text{P}\{^1\text{H}\}$  NMR spectroscopy showed that no reaction has occurred. Subsequent heating of the reaction mixture to  $40^\circ\text{C}$  for two hours results mainly in the formation of 3,3-dimethyl-5,7-di-*tert*-butylphosphaindane (**A**) (Figures S5-S7).

**$^1\text{H}$  NMR** (300 MHz,  $\text{C}_6\text{D}_6$ , 298 K):  $\delta = 1.12$  (s, 3H,  $\text{C}_q(\text{CH}_3)_2$ ), 1.30-1.32 (m, 12H,  $\text{C}_q(\text{CH}_3)_2$ ,  $\text{C}_q(\text{CH}_3)_3$ ), 1.57 (s, 9H,  $\text{C}_q(\text{CH}_3)_3$ ), 1.69-1.75 (m, 2H,  $\text{PHCH}_2$ ), 4.40 (dm,  $^1J_{\text{P,H}} = 181.6$  Hz, PH), 7.16 (m, 1H,  $\text{CH}_{\text{Aryl}}$ )\*, 7.46-7.48 (m, 1H,  $\text{CH}_{\text{Aryl}}$ ) ppm.

\* = overlap with  $\text{C}_6\text{D}_5\text{H}$  signal

**$^{13}\text{C}\{^1\text{H}\}$  NMR** (75 MHz,  $\text{C}_6\text{D}_6$ , 298 K):  $\delta = 27.5$  ( $\text{C}_q(\text{CH}_3)_2$ ), 30.3 ( $\text{C}_q(\text{CH}_3)_2$ ), 31.3 (d,  $J_{\text{P,C}} = 10.0$  Hz,  $\text{C}_q(\text{CH}_3)_3$ ), 31.7 ( $\text{C}_q(\text{CH}_3)_3$ ), 35.1 ( $\text{C}_q(\text{CH}_3)_3$ ), 35.6 (d,  $^1J_{\text{P,C}} = 4.9$  Hz,  $\text{PCH}_2$ ), 31.7 ( $\text{C}_q(\text{CH}_3)_3$ ), 47.0 (d,  $^2J_{\text{P,C}} = \text{Hz}$ ,  $\text{C}_q(\text{CH}_3)_2$ ), 117.9 (d,  $^3J_{\text{P,C}} = 1.2$  Hz,  $\text{CH}_{\text{Aryl}}$ ), 121.4 (d,  $^3J_{\text{P,C}} = 4.9$  Hz,  $\text{CH}_{\text{Aryl}}$ ), 130.0 (d,  $^2J_{\text{P,C}} = 14.9$  Hz,  $\text{C}_{\text{q,Aryl}}$ ), 151.7 ( $\text{C}_{\text{q,Aryl}}$ ), 152.9 (d,  $^1J_{\text{P,C}} = 14.2$  Hz,  $\text{C}_{\text{q,Aryl}}$ ), 157.4 ( $\text{C}_{\text{q,Aryl}}$ ) ppm.

**$^{31}\text{P}\{^1\text{H}\}/^{31}\text{P}$  NMR** (122 MHz,  $\text{C}_6\text{D}_6$ , 298 K):  $\delta = -79.7$  (dm,  $^1J_{\text{P,H}} = 181.9$  Hz) ppm.

**Figure S5:**  $^1\text{H}$  NMR spectrum of the reaction of  $\text{Cp}_2\text{Ti}(\text{btmsa})$  (**1**) with  $\text{Mes}^*\text{PPMe}_3$  (**2a**) (300 MHz,  $\text{C}_6\text{D}_6$ , rt); -0.25 and 6.26 ppm:  $\text{Cp}_2\text{Ti}(\text{btmsa})$ , 0.15 ppm: btmsa.

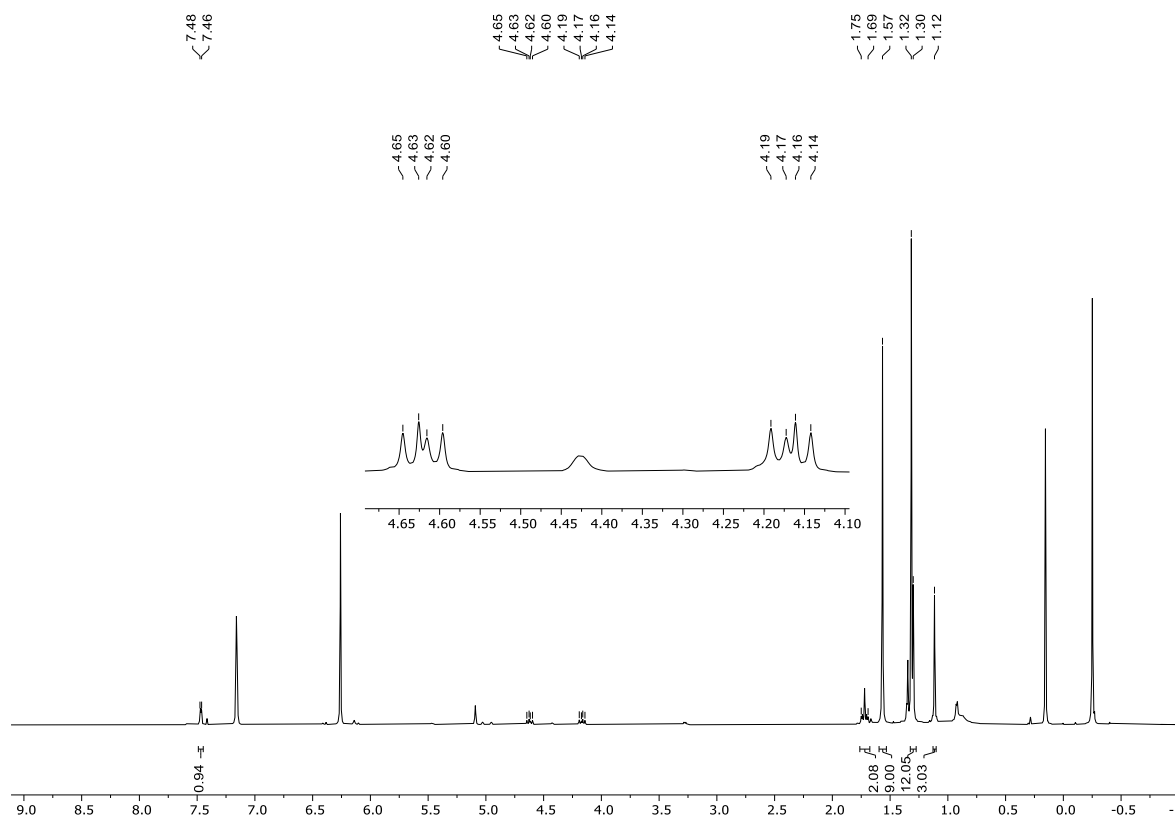

**Figure S6:**  $^{13}\text{C}\{^1\text{H}\}$  NMR spectrum of the reaction of  $\text{Cp}_2\text{Ti}(\text{btmsa})$  (**1**) with  $\text{Mes}^*\text{PPMe}_3$  (**2a**) (75 MHz,  $\text{C}_6\text{D}_6$ , rt); 0.9 and 116.2 ppm:  $\text{Cp}_2\text{Ti}(\text{btmsa})$ , 0.0 ppm: btmsa.

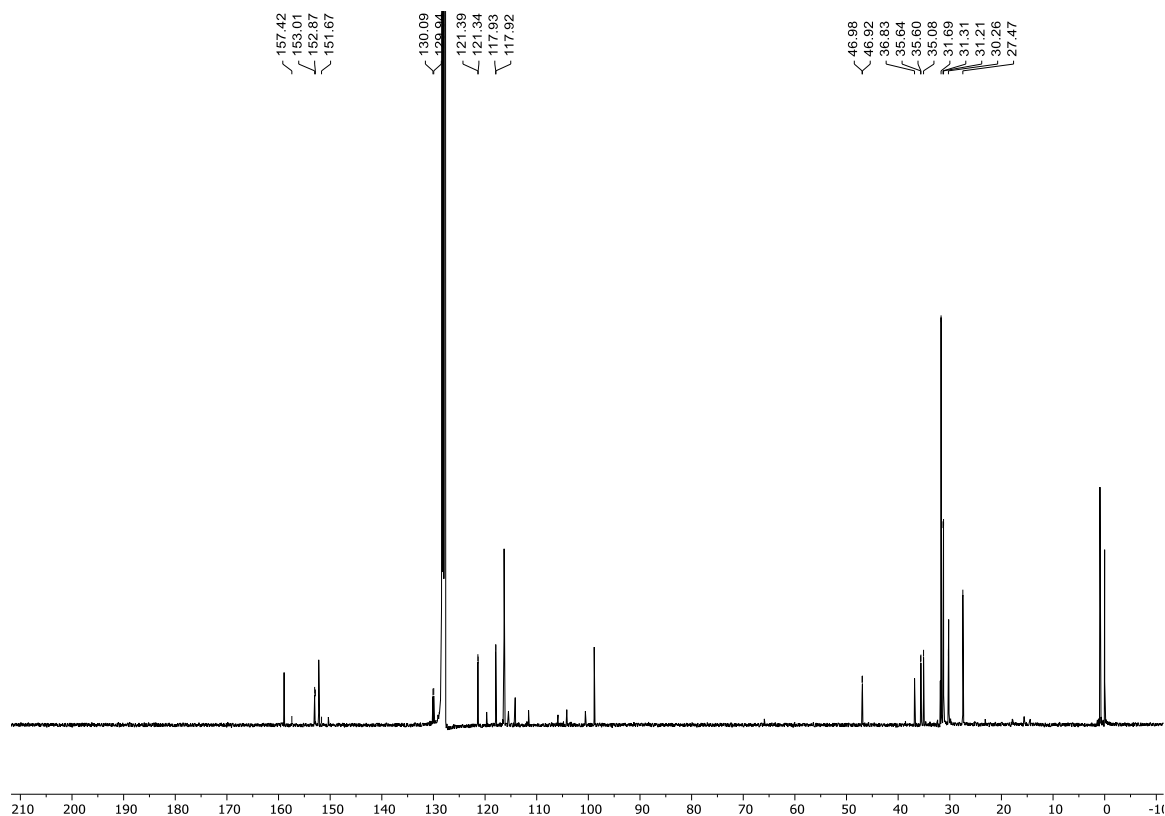

**Figure S7:**  $^{31}\text{P}\{^1\text{H}\}$  (bottom) and  $^{31}\text{P}$  NMR (top) spectra of the reaction of  $\text{Cp}_2\text{Ti}(\text{btmsa})$  (**1**) with  $\text{Mes}^*\text{PPMe}_3$  (**2a**) (122 MHz,  $\text{C}_6\text{D}_6$ , rt).

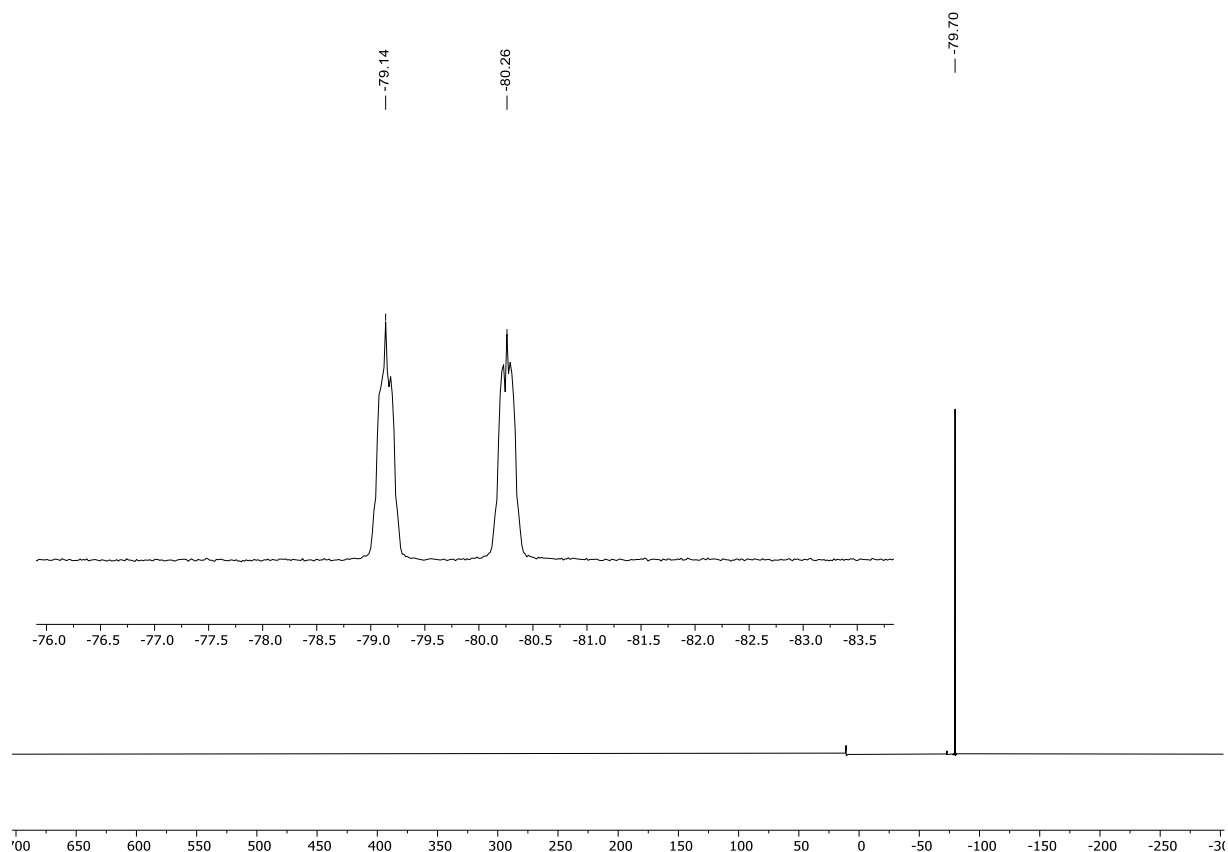

### 3.2 Attempted Synthesis of $\text{Cp}_2\text{Ti}(\text{PMe}_3)\text{P}^{\text{DipTer}}$

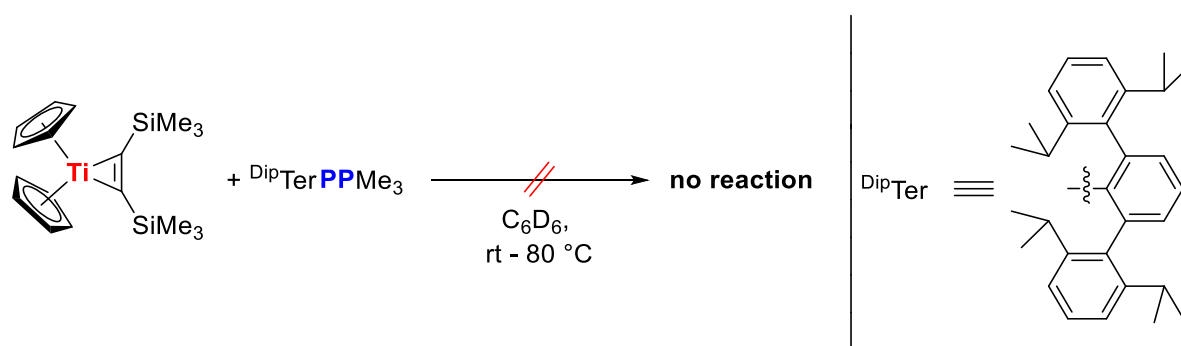

In a Young NMR tube  $\text{Cp}_2\text{Ti}(\text{btmsa})$  (**1**) (0.015 g, 0.043 mmol) and  $\text{DipTerPPMe}_3$  (**2c**) (0.022 g, 0.043 mmol) were dissolved in 0.6 mL of  $\text{C}_6\text{D}_6$ . The reaction mixture was allowed to stand for 16 h at room temperature. Regular control by  $^1\text{H}$  and  $^{31}\text{P}\{^1\text{H}\}$  NMR spectroscopy showed that no reaction has occurred. Subsequent heating of the reaction mixture to  $80^\circ\text{C}$  for two days and further heating to  $115^\circ\text{C}$  only results in the

decomposition of  $\text{Cp}_2\text{Ti}(\text{btmsa})$  (**1**), which is shown by the release of btmsa and decreasing signal intensity for the signals of  $\text{Cp}_2\text{Ti}(\text{btmsa})$  (**1**) (Figure S8).

**Figure S8:** Monitoring of the reaction of  $\text{Cp}_2\text{Ti}(\text{btmsa})$  (**1**) with  $^{\text{Dipp}}\text{TerPPMe}_3$  (**2c**) via  $^1\text{H}$  NMR spectroscopy (300 MHz,  $\text{C}_6\text{D}_6$ , rt to indicated T); 0.15 ppm: btmsa, -0.32 and 6.42 ppm:  $\text{Cp}_2\text{Ti}(\text{btmsa})$  (**1**).

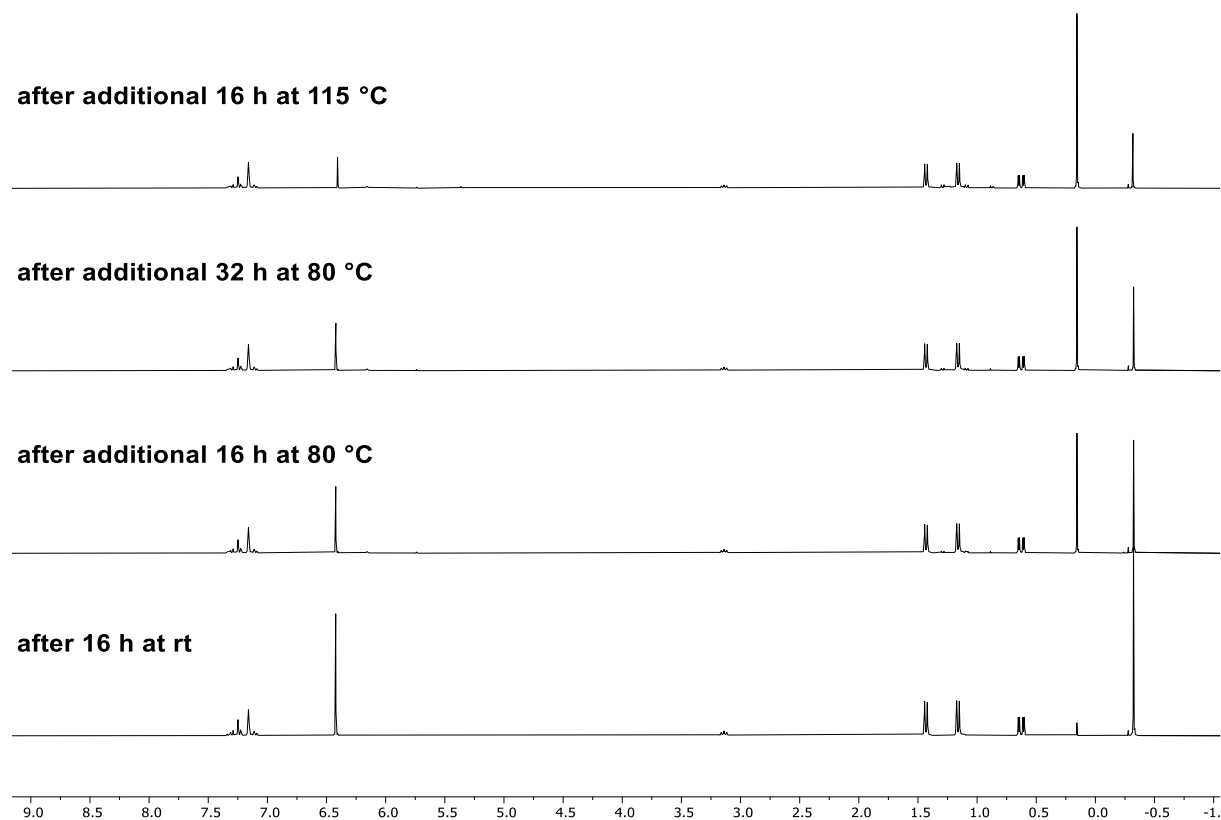

## 4 Syntheses of compounds

### 4.1 Synthesis of $\text{Cp}_2(\text{PMe}_3)\text{TiP}^{\text{MesTer}}\text{Ter}$ (**3**)

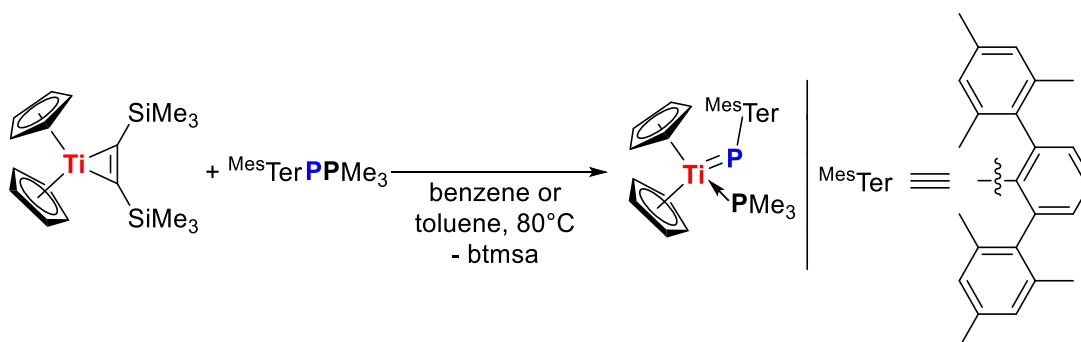

**A)** In a Young NMR tube  $\text{Cp}_2\text{Ti}(\text{btmsa})$  (**1**) (0.022 g, 0.063 mmol) and  $\text{MesTerPPMe}_3$  (**2b**) (0.027 g, 0.063 mmol) were dissolved in either 0.6 mL of  $\text{C}_6\text{D}_6$  or 0.6 mL of toluene- $d_8$ . The reaction mixture was heated to  $80^\circ\text{C}$  overnight, which resulted in a colour change to dark orange/red and, due to its poor solubility, precipitation of  $\text{Cp}_2(\text{PMe}_3)\text{TiP}^{\text{MesTer}}\text{Ter}$  (**3**). NMR spectroscopy revealed consumption of both starting materials to mainly yield  $\text{Cp}_2(\text{PMe}_3)\text{TiP}^{\text{MesTer}}\text{Ter}$  (**3**).

Crystals suitable for single-crystal X-ray diffraction were obtained by slowly cooling of a toluene- $d_8$  solution of **3** from  $80^\circ\text{C}$  to room temperature.

**B)**  $\text{Cp}_2\text{Ti}(\text{btmsa})$  (**1**) (0.331 g, 0.951 mmol) and  $\text{MesTerPPMe}_3$  (**2b**) (0.400 g, 0.951 mmol) were dissolved in 10 mL of benzene and the reaction mixture was stirred for 48 h at  $80^\circ\text{C}$ . All volatile components were removed under vacuum and the remaining solid was washed with small amounts of benzene ( $3 \times 1$  mL). Removal of all volatile components under vacuum yielded  $\text{Cp}_2(\text{PMe}_3)\text{TiP}^{\text{MesTer}}\text{Ter}$  (**3**) as a dark orange/red solid.

**Note:** **3** is poorly soluble in aromatic and aliphatic hydrocarbons such as benzene, toluene, *n*-hexane and tetrahydrofuran. Btmsa helps with the solubility so that the NMR data of attempt A are shown below.

**Yield:** 0.386 g (0.645 mmol; 68%).

**EA:** calculated: C 74.24, H 7.41; found: C 74.14, H 7.83.  **$^1\text{H}$  NMR** (300 MHz,  $\text{C}_6\text{D}_6$ , 298 K):  $\delta$  = 0.32 (d,  $^2J_{\text{P,H}}$  = 6.8 Hz, 9H,  $\text{P}(\text{CH}_3)_3$ ), 2.20 (s(br), 6H,  $p\text{-CH}_3\text{C}_6\text{H}_3$ ), 2-37 (s(br), 12H,  $o\text{-CH}_3\text{C}_6\text{H}_3$ ), 5.22 (s, 5H,  $\text{C}_5\text{H}_5$ ), 5.23 (s, 5H,  $\text{C}_5\text{H}_5$ ), 6.42 (s, 1H,  $\text{CH}_{\text{Aryl}}$ ), 6.77-6.78 (m(br), 4H,  $\text{CH}_{\text{Aryl}}$ ), 7.16-7.18 (m, 2H,  $\text{CH}_{\text{Aryl}}$ )\* ppm. \* = overlap with  $\text{C}_6\text{D}_5\text{H}$  signal.  **$^{13}\text{C}\{^1\text{H}\}$  NMR** (75 MHz,  $\text{C}_6\text{D}_6$ , 298 K):  $\delta$  = 19.5 (d,  $^1J_{\text{P,C}}$  = 19.8 Hz,  $\text{P}(\text{CH}_3)_3$ ), 21.1 ( $p\text{-CH}_3\text{C}_6\text{H}_3$ ), 21.6 ( $o\text{-CH}_3\text{C}_6\text{H}_3$ ), 103.8 ( $\text{C}_5\text{H}_5$ ), 114.2 ( $\text{C}_{\text{Aryl}}$ ), 117.9 ( $\text{C}_{\text{Aryl}}$ ), 124.5 ( $\text{C}_{\text{Aryl}}$ ), 135.3 ( $\text{C}_{\text{Aryl}}$ ) ppm. **Note:** All other signals are significantly broadened so that an unambiguous assignment was not possible.  **$^{31}\text{P}\{^1\text{H}\}$  NMR** (122 MHz,  $\text{C}_6\text{D}_6$ , 298 K):  $\delta$  = 8.0 (d,  $^2J_{\text{P,P}}$  = 21.7 Hz,  $\text{P}(\text{CH}_3)_3$ ), 1067.3 (d,  $^2J_{\text{P,P}}$  = 27.8 Hz,  $\text{P}^{\text{MesTer}}$ ) ppm. **MS** (ESI-TOF): expected:  $m/z$  = 599.2480 [ $\text{M} + \text{H}$ ] $^+$ ; found:  $m/z$  = 599.2484. Fragment:  $m/z$  = 523.2036 [ $\text{M} + \text{H} - \text{PMe}_3$ ] $^+$ .

**Figure S9:**  $^1\text{H}$  NMR spectrum after the reaction of  $\text{Cp}_2\text{Ti}(\text{btmsa})$  (**1**) with  $^{\text{MesTer}}\text{PPMe}_3$  (**2b**) (procedure A) (300 MHz,  $\text{C}_6\text{D}_6$ , rt); 0.15 ppm: btmsa.

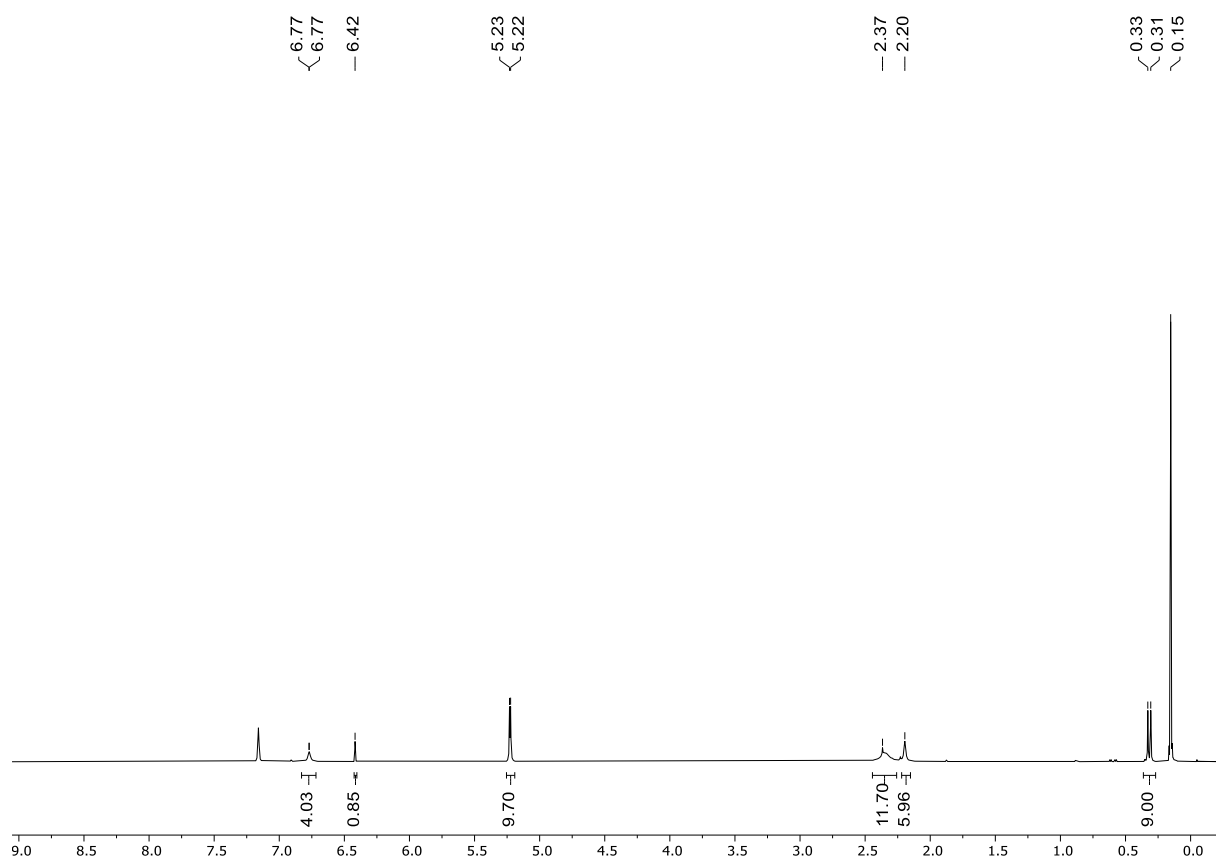

**Figure S10:**  $^{13}\text{C}\{^1\text{H}\}$  NMR spectrum after the reaction of  $\text{Cp}_2\text{Ti}(\text{btmsa})$  (**1**) with  $^{\text{Mes}}\text{TerPPMe}_3$  (**2b**) (procedure A) (75 MHz,  $\text{C}_6\text{D}_6$ , rt); 0.0 ppm: btmsa.

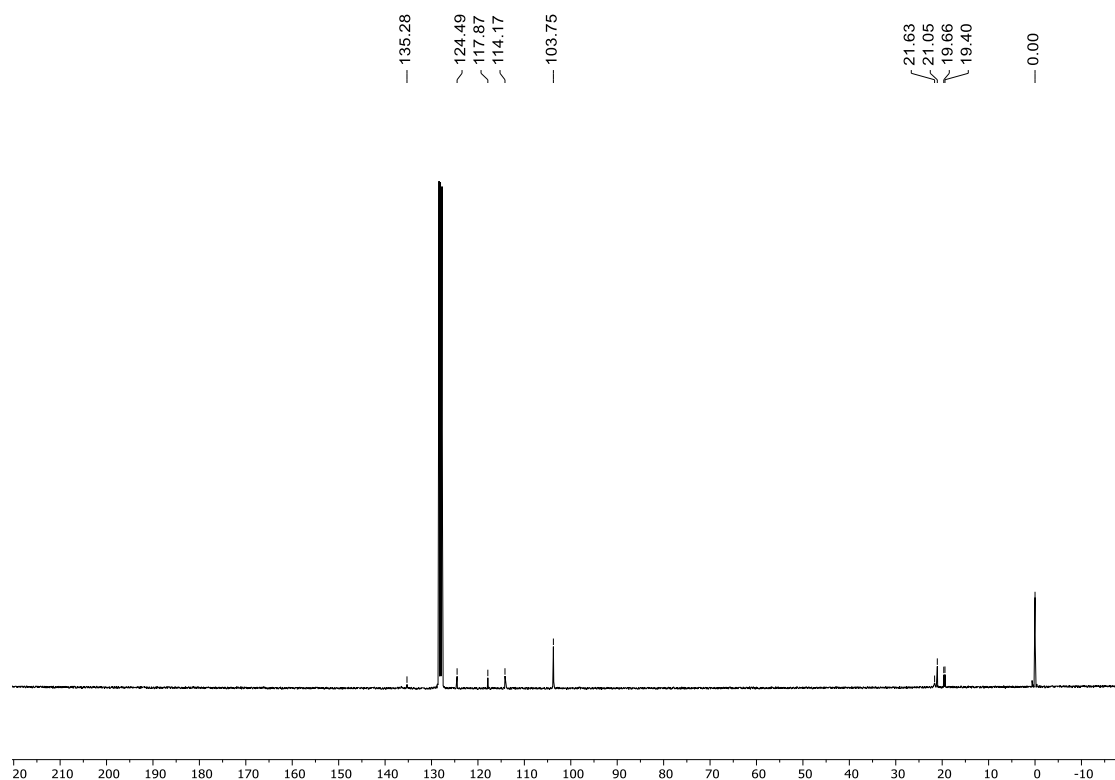

**Figure S11:**  $^{31}\text{P}\{^1\text{H}\}$  NMR spectrum after the reaction of  $\text{Cp}_2\text{Ti}(\text{btmsa})$  (**1**) with  $^{\text{Mes}}\text{TerPPMe}_3$  (**2b**) (procedure A) (122 MHz,  $\text{C}_6\text{D}_6$ , rt); #: free  $^{\text{Mes}}\text{TerP}=\text{PMe}_3$ .

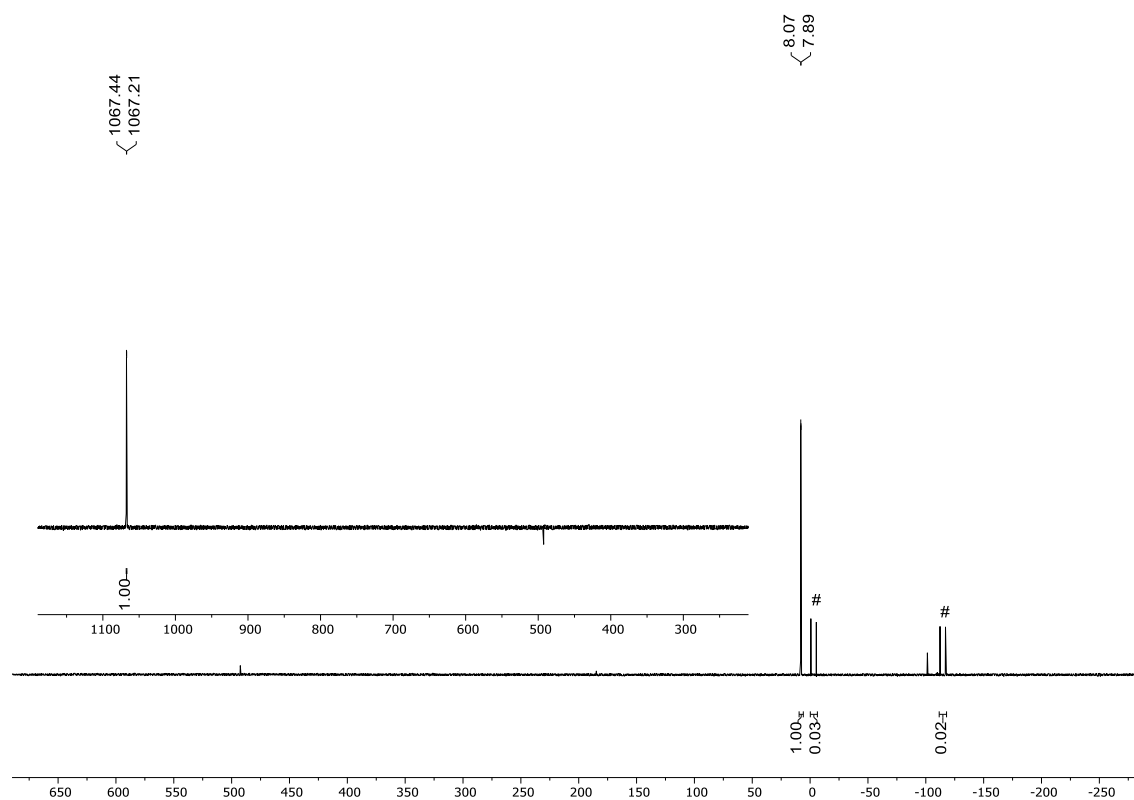

## 4.2 Synthesis of $\text{Cp}_2\text{Ti}(\text{PMe}_3)\text{As}^{\text{DipTer}}(\text{5})$

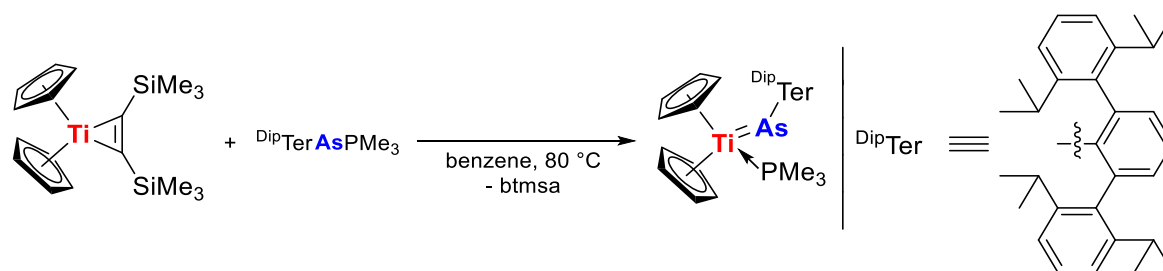

**A)** In a Young NMR tube  $\text{Cp}_2\text{Ti}(\text{btmsa})$  (**1**) (0.030 g, 0.086 mmol) and  $\text{DipTerAsPMe}_3$  (**4**) (0.047 g, 0.086 mmol) were dissolved in 0.6 mL of  $\text{C}_6\text{D}_6$ . The reaction mixture was heated to 80 °C over night which results in a color change to dark red. All volatile components were removed under vacuum. *n*-Pentane (4×1 mL) was added to the residue and the respective supernatants were filtered through a microfiber filter.

Storage of the combined solutions at -30 °C resulted in the precipitation of crystals of **5** suitable for single crystal X-ray diffraction.

**B)**  $\text{Cp}_2\text{Ti}(\text{btmsa})$  (**1**) (0.019 g, 0.055 mmol) and  $\text{DipTerAsPMe}_3$  (**4**) (0.030 g, 0.086 mmol) were dissolved in  $\text{C}_6\text{D}_6$ . The reaction mixture was heated to 80 °C for 16 hours which revealed complete conversion of both starting materials to give  $\text{Cp}_2(\text{PMe}_3)\text{TiAs}^{\text{DipTer}}$  (**5**) accompanied by release of  $\text{btmsa}$ . Removal of all volatile components under vacuum gave **5** as a dark red solid.

**Note:** Performing the reaction at 80 °C according to procedure **B** but using an excess of  $\text{DipTerAsPMe}_3$  (**4**) results in the formation of  $\text{DipTerAsAs}^{\text{DipTer}}$  (**6**) as a byproduct (Figure S15).

**Yield:** 0.024 g (0.033 mmol; 60% (method **B**)).

**$^1\text{H}$  NMR** (300 MHz,  $\text{C}_6\text{D}_6$ , 298 K):  $\delta$  = 0.10 (d,  $^2J_{\text{P,H}}$  = 6.6 Hz, 9H,  $\text{P}(\text{CH}_3)_3$ ), 0.69-1.42 (m(br), 24H,  $\text{CH}(\text{CH}_3)_2$ ), 2.42-3.80 (m(br), 4H,  $\text{CH}(\text{CH}_3)_2$ ), 4.97-5.07 (m(br), 10H,  $\text{C}_5\text{H}_5$ ), 6.86-7.05 (m(br), 5H,  $\text{CH}_{\text{Aryl}}$ )\*, 7.09-7.14 (m, 1H,  $\text{CH}_{\text{Aryl}}$ ), 7.17-7.37 (m(br), 2H,  $\text{CH}_{\text{Aryl}}$ ) ppm. \* =

overlap with C<sub>6</sub>D<sub>5</sub>H signal. **<sup>13</sup>C{<sup>1</sup>H} NMR** (75 MHz, C<sub>6</sub>D<sub>6</sub>, 298 K): δ = 19.5 (d, <sup>1</sup>J<sub>P,C</sub> = 20.1 Hz, P(CH<sub>3</sub>)<sub>3</sub>) ppm. **Note:** All other signals are significantly broadened so that a clear assignment was not possible. **<sup>31</sup>P{<sup>1</sup>H} NMR** (122 MHz, C<sub>6</sub>D<sub>6</sub>, 298 K): δ = 16.7 ppm.

**Figure S12:** <sup>1</sup>H NMR spectrum after the reaction of Cp<sub>2</sub>Ti(btmsa) (**1**) with <sup>Dip</sup>TerAsPMe<sub>3</sub> (**4**) (300 MHz, C<sub>6</sub>D<sub>6</sub>, rt).

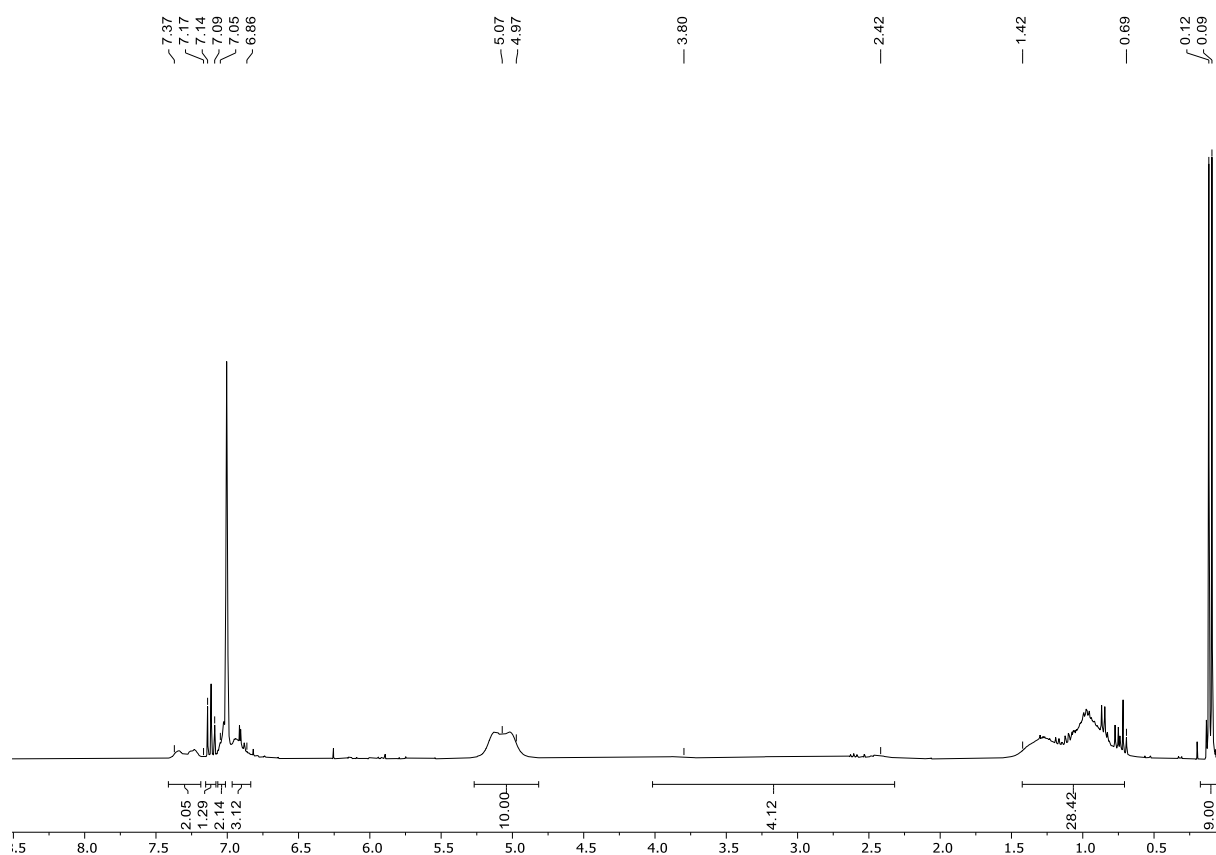

**Figure S13:**  $^{13}\text{C}$  NMR spectrum after the reaction of  $\text{Cp}_2\text{Ti}(\text{btmsa})$  (**1**) with  $^{\text{Dip}}\text{TerAsPMe}_3$  (**4**) (122 MHz,  $\text{C}_6\text{D}_6$ , rt).

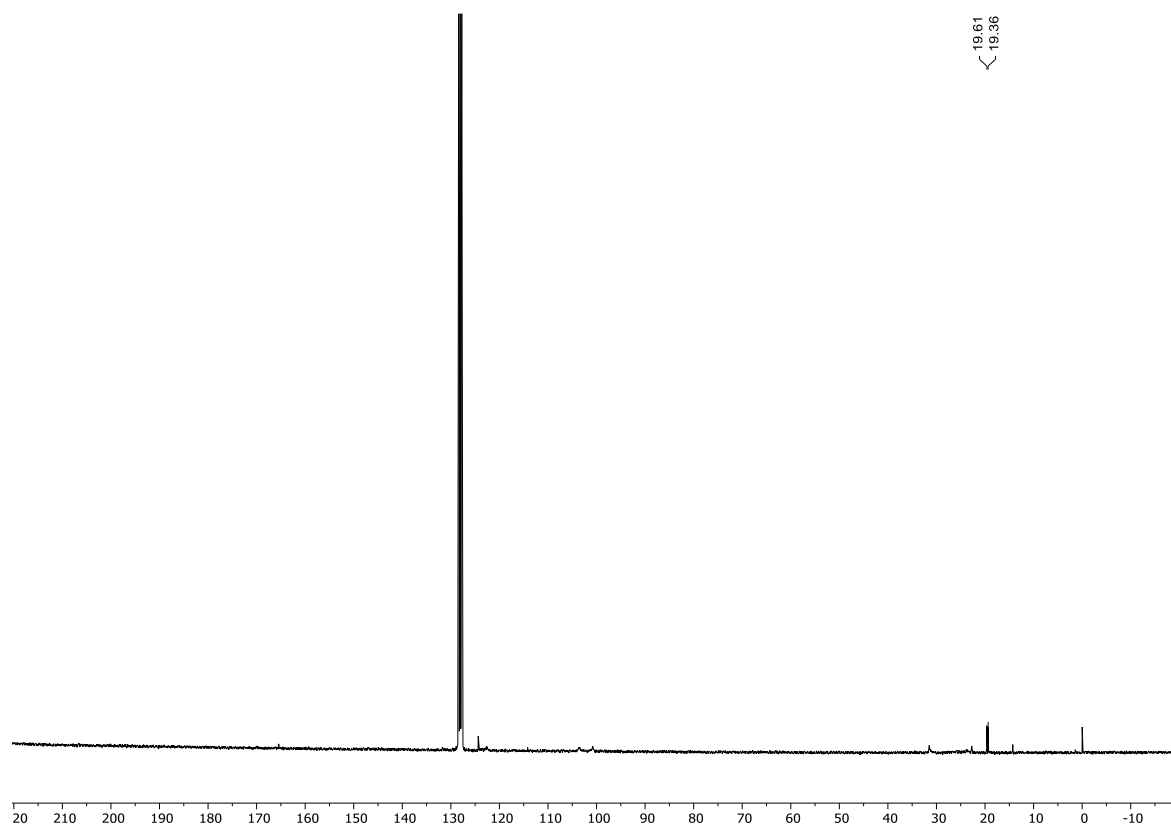

**Figure S14:**  $^{31}\text{P}\{^1\text{H}\}$  NMR spectrum after the reaction of  $\text{Cp}_2\text{Ti}(\text{btmsa})$  (**1**) with  $^{\text{Dip}}\text{TerAsPMe}_3$  (**4**) (122 MHz,  $\text{C}_6\text{D}_6$ , rt).

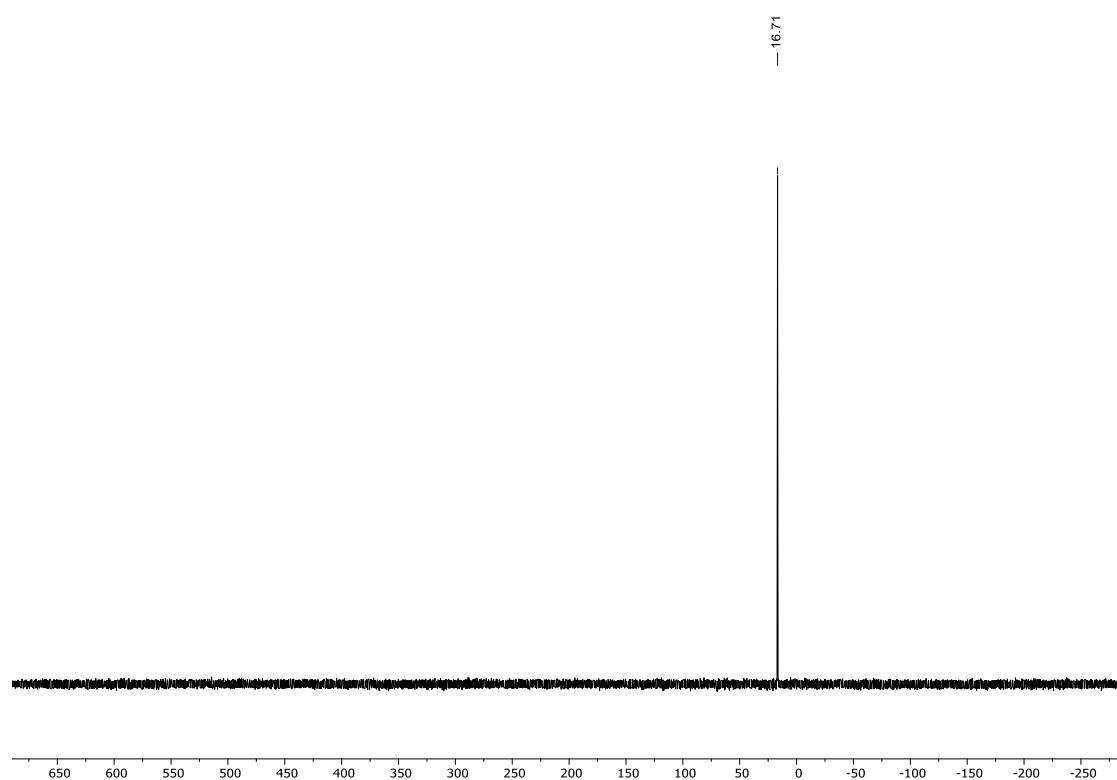

**Figure S15:**  $^1\text{H}$  NMR spectrum of the reaction of excess  $^{\text{Dip}}\text{TerAsPMe}_3$  (**4**) with  $\text{Cp}_2\text{Ti}(\text{btmsa})$  (**1**) (300 MHz,  $\text{C}_6\text{D}_6$ , rt) \* = characteristic signals of  $^{\text{Dip}}\text{TerAsAs}^{\text{Dip}}\text{Ter}$  (**6**), + = characteristic signals of  $^{\text{Dip}}\text{TerAsPMe}_3$  (**4**).

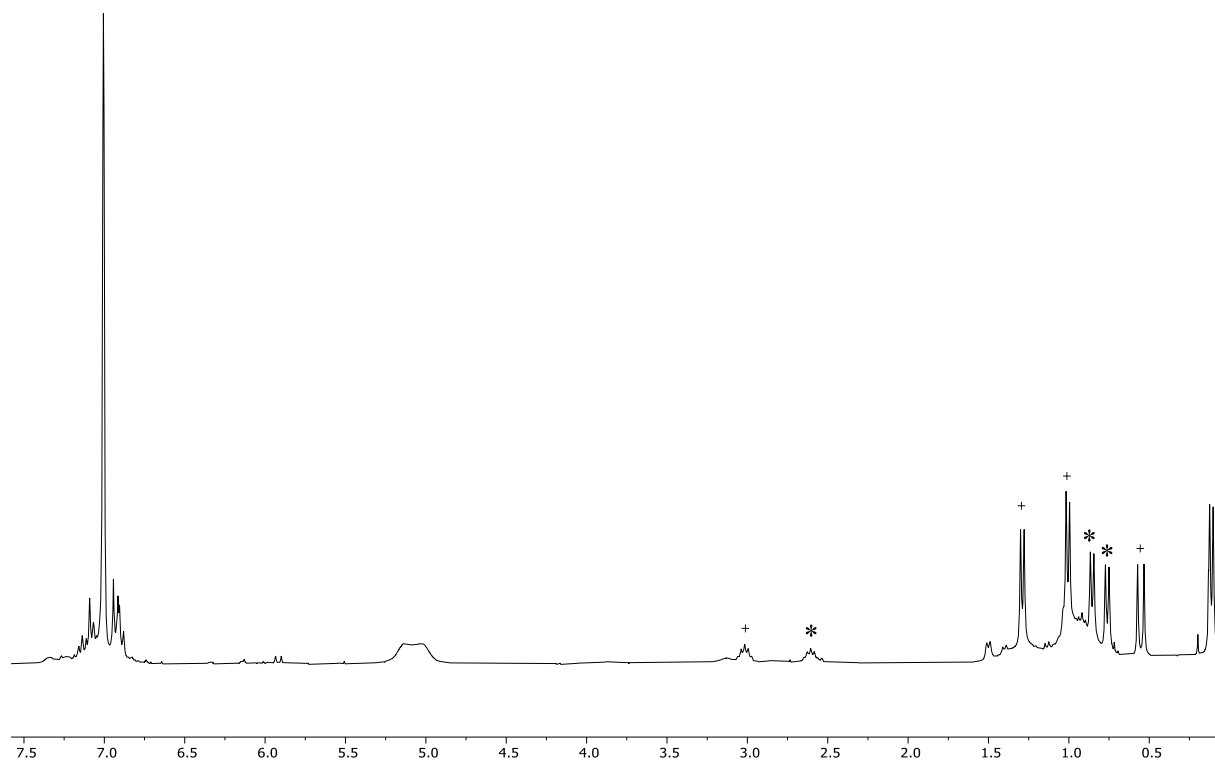

### 4.3 Synthesis of $(^{\text{Dip}}\text{TerAs})_2$ (**6**)

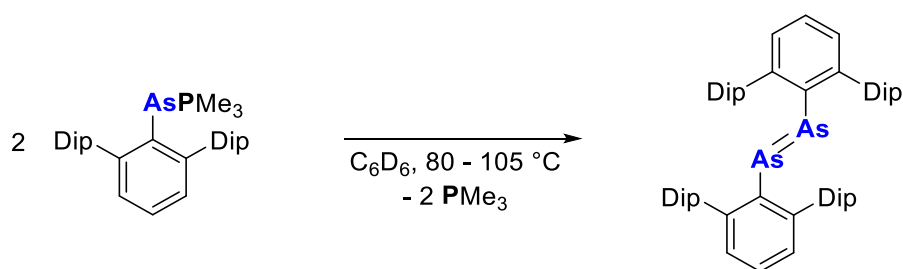

In a Young NMR tube  $^{\text{Dip}}\text{TerAsPMe}_3$  (**4**) (0.030 g, 0.055 mmol) was dissolved in 0.6 mL of  $\text{C}_6\text{D}_6$ . The sample was heated to 80 °C for 7 hours and subsequent  $^1\text{H}$  and  $^{31}\text{P}\{^1\text{H}\}$  NMR spectroscopy revealed slow conversion of **4**. Therefore, the temperature was increased to 105 °C, and the sample was regularly analysed by  $^1\text{H}$  and  $^{31}\text{P}\{^1\text{H}\}$  NMR spectroscopy. After 130 h at that temperature **4** was consumed completely to give  $^{\text{Dip}}\text{TerAsAs}^{\text{Dip}}\text{Ter}$  (**6**). All volatile components were removed under vacuum. 2 mL of

*n*-pentane were added, the solution was passed through a microfiber filter, and stored at -30 °C to yield <sup>Dip</sup>TerAsAs<sup>Dip</sup>Ter (**6**) as an orange crystalline solid. These crystals were suitable for single crystal X-ray diffraction. Crystals suitable for single crystal X-ray diffraction were also obtained from a saturated solution of **6** in C<sub>6</sub>D<sub>6</sub> at room temperature.

**Yield:** 0.014 g (0.015 mmol; 54%).

**<sup>1</sup>H NMR** (300 MHz, C<sub>6</sub>D<sub>6</sub>, 298 K): δ = 0.92 (d, <sup>3</sup>J<sub>H,H</sub> = 6.8 Hz, 24H, CH(CH<sub>3</sub>)<sub>2</sub>), 1.02 (d, <sup>3</sup>J<sub>H,H</sub> = 6.9 Hz, 24H, CH(CH<sub>3</sub>)<sub>2</sub>), 2.77 (hept, <sup>3</sup>J<sub>H,H</sub> = 7.0 Hz, 8H, CH(CH<sub>3</sub>)<sub>2</sub>), 7.04-7.05 (m, 4H, CH<sub>Aryl</sub>), 7.07-7.08 (m, 10H, CH<sub>Aryl</sub>), 7.17-7.21 (m, 4H, CH<sub>Aryl</sub>)\* ppm. \* = overlap with C<sub>6</sub>D<sub>5</sub>H signal. **<sup>13</sup>C{<sup>1</sup>H} NMR** (75 MHz, C<sub>6</sub>D<sub>6</sub>, 298 K): δ = 23.8 (CH(CH<sub>3</sub>)<sub>2</sub>), 25.8 (CH(CH<sub>3</sub>)<sub>2</sub>), 31.1 (CH(CH<sub>3</sub>)<sub>2</sub>), 123.8 (CH<sub>Aryl</sub>), 128.2 (CH<sub>Aryl</sub>)\*, 128.9 (CH<sub>Aryl</sub>), 130.8 (CH<sub>Aryl</sub>), 140.4 (C<sub>q,Aryl</sub>), 144.9 (C<sub>q,Aryl</sub>), 146.2 (C<sub>q,Aryl</sub>), 151.4 (C<sub>q,Aryl</sub>) ppm. \* = overlap with C<sub>6</sub>D<sub>6</sub> signal. **MS** (ESI-TOF): expected: m/z = 945.4301 [M + H]<sup>+</sup>, 967.4114 [M + Na]<sup>+</sup>; found: m/z = 945.4283 [M + H]<sup>+</sup>, 967.4113 [M + Na]<sup>+</sup>.

**Figure S16:** Monitoring of  $^{\text{Dip}}\text{TerAsPMe}_3$  (**4**) at higher temperatures via  $^1\text{H}$  NMR spectroscopy (300 MHz,  $\text{C}_6\text{D}_6$ ).

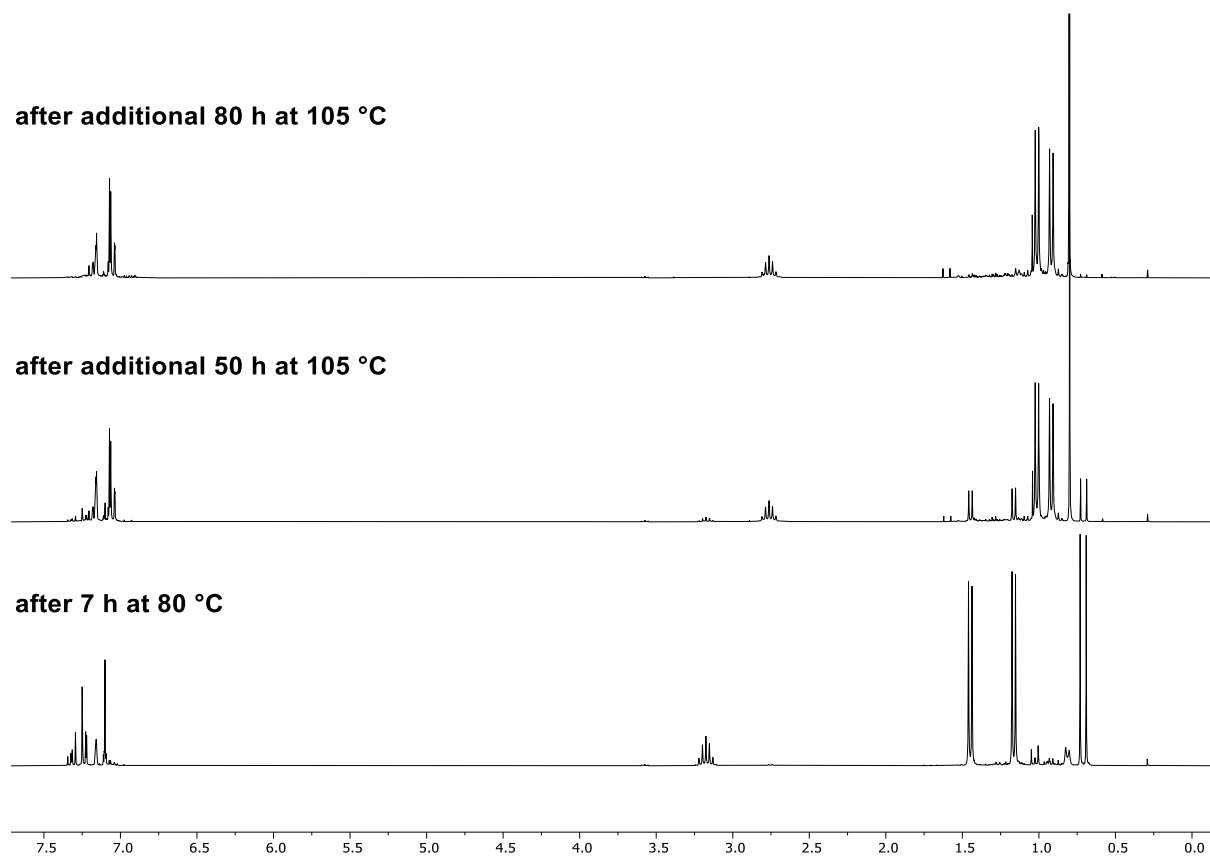

**Figure S17:** Monitoring of  $^{\text{Dip}}\text{TerAsPMe}_3$  (4) at higher temperatures via  $^{31}\text{P}\{^1\text{H}\}$  NMR spectroscopy (122 MHz,  $\text{C}_6\text{D}_6$ , rt); -14.6 ppm:  $^{\text{Dip}}\text{TerAsPMe}_3$  (6); -57.6 ppm:  $\text{PMe}_3$ .

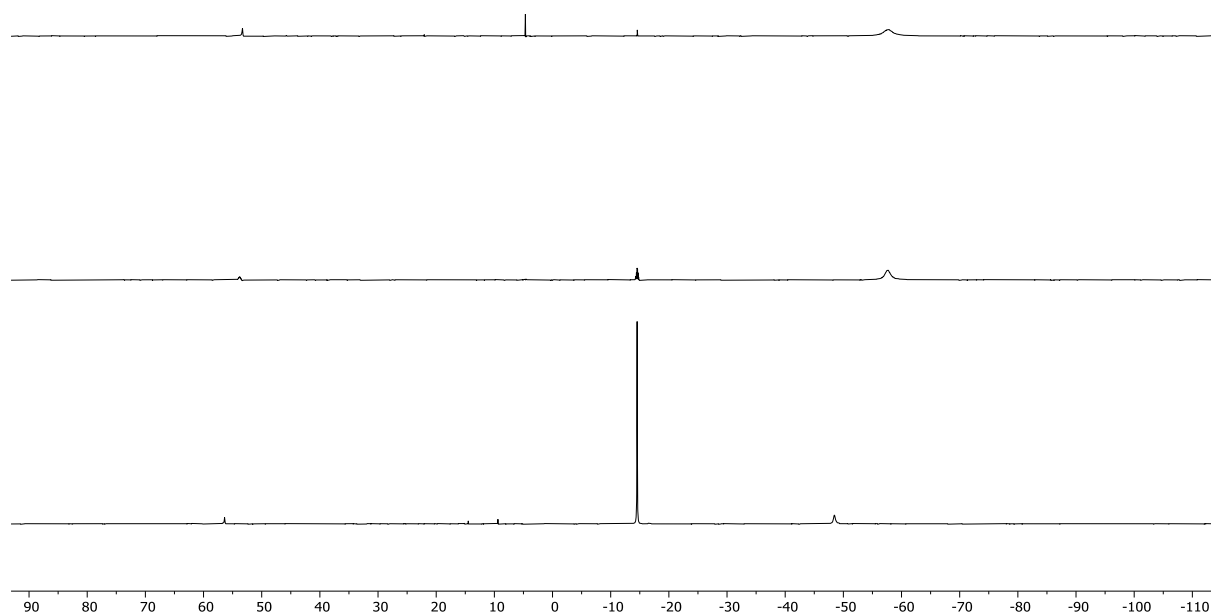

**Figure S18:**  $^1\text{H}$  NMR spectrum of  $^{\text{Dip}}\text{TerAsAs}^{\text{Dip}}\text{Ter}$  (**6**) (300 MHz,  $\text{C}_6\text{D}_6$ , rt); 0.29 ppm: silicon grease.

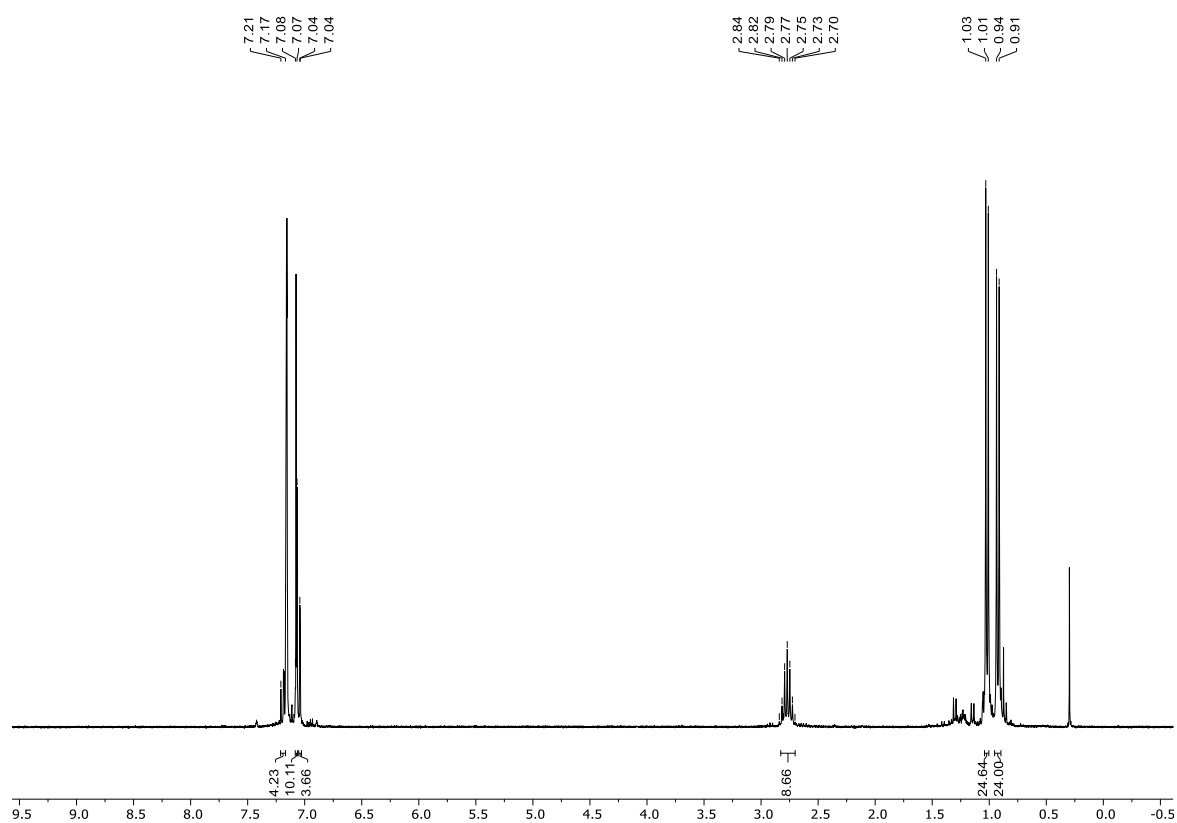

**Figure S19:**  $^{13}\text{C}\{^1\text{H}\}$  NMR spectrum of  $^{\text{Dip}}\text{TerAsAs}^{\text{Dip}}\text{Ter}$  (**6**) (75 MHz,  $\text{C}_6\text{D}_6$ , rt); 1.4 ppm: silicon grease.

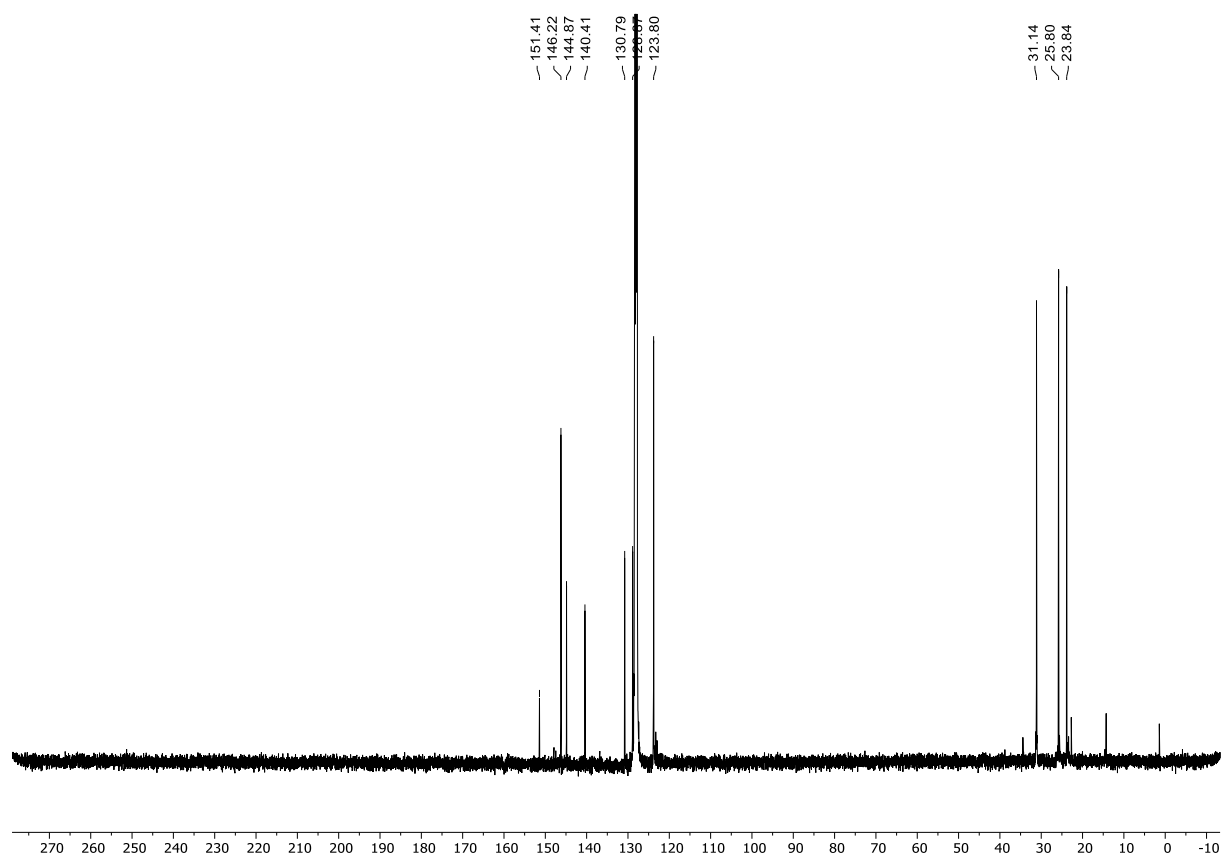

## 5 Computational details

### 5.1 General remarks

Computations were carried out using *Gaussian16*<sup>8</sup> and the standalone version of *NBO 6.0*.<sup>9</sup>

In a first step we investigated the thermodynamic feasibility of the reaction between group 4 alkyne complexes and experimentally accessible phospho- as well as arsa-Wittig reagents to form the respective phosphinidene or arsinidene complexes of the type  $\text{Cp}_2\text{M}(\text{PMe}_3)\text{PAr}$  ( $\text{M} = \text{Ti}, \text{Zr}$ ). Therefore, we optimized the real-size molecules using the hybrid density functional method B3LYP,<sup>10,11</sup> in combination with the basis set def2svp,<sup>12</sup> and the empirical dispersion correction GD3BJ<sup>13</sup> (notation: B3LYP/GD3BJ/def2svp). Vibrational frequencies were also computed, to include zero-point vibrational energies in thermodynamic parameters and to characterise all structures as minima on the potential energy surface. NLMO analyses were performed using the standalone version of *NBO 6.0*. QT-AIM, ELF and Wiberg Bondindex calculations/visualization were performed using MultiWfn 3.6 employing *Gaussian16* formatted checkpoint files.<sup>14</sup> For the visualization of 3D-quantum chemical results we used GaussView6.1.1.<sup>15</sup> In addition to the electronic supporting information we provide a multi-structure xyz-file including all calculated molecules.

Please note that all computations were carried out for single, isolated molecules in the gas phase (ideal gas approximation). There may well be significant differences between gas phase and condensed phase.

### 5.2 Thermochemistry

In this chapter we summarize the results of our thermodynamic calculations, which were performed on the B3LYP/GD3BJ/def2svp level of theory as described

beforehand. It should be noted that we did not calculate transition states or intermediate structures for further insights into the reaction mechanism. Nevertheless, this simple thermodynamic consideration nicely supports the observed reaction behaviours.

### 5.2.1 Group 4 metallocenes bearing phosphinidenes and arsinidenes

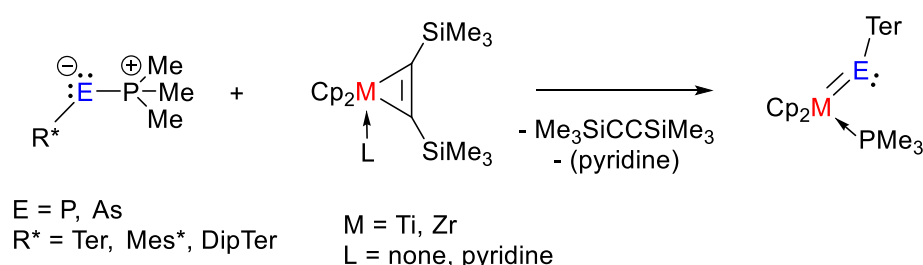

**Scheme S1:** Calculated reaction sequence to group 4 metallocenes bearing phosphinidenes and arsinidenes.

**Table S4.** Summary of calculated thermodynamic values for the formation of group 4 metallocene bearing phosphinidenes and arsinidenes.

| Compound                                                    | $\Delta_R H$ [kJ/mol] | $\Delta_R G$ [kJ/mol] | $\Delta_R H$ [kcal/mol] | $\Delta_R G$ [kcal/mol] |
|-------------------------------------------------------------|-----------------------|-----------------------|-------------------------|-------------------------|
| <b>Cp<sub>2</sub>Ti(PMe<sub>3</sub>)P<sup>Mes</sup>Ter</b>  | -54.7                 | -47.0                 | -13.1                   | -11.2                   |
| <b>Cp<sub>2</sub>Ti(PMe<sub>3</sub>)P<sup>DipTer</sup></b>  | -48.0                 | -37.8                 | -11.5                   | -9.0                    |
| <b>Cp<sub>2</sub>Ti(PMe<sub>3</sub>)P<sup>Mes</sup>*</b>    | -27.8                 | -24.1                 | -6.6                    | -5.8                    |
| <b>Cp<sub>2</sub>Zr(PMe<sub>3</sub>)P<sup>Mes</sup>Ter</b>  | 16.2                  | -38.8                 | 3.9                     | -9.3                    |
| <b>Cp<sub>2</sub>Ti(PMe<sub>3</sub>)As<sup>Mes</sup>Ter</b> | -62.1                 | -56.3                 | -14.9                   | -13.4                   |
| <b>Cp<sub>2</sub>Zr(PMe<sub>3</sub>)As<sup>Mes</sup>Ter</b> | 13.6                  | -39.4                 | 3.3                     | -9.4                    |
| <b>Cp<sub>2</sub>Ti(PMe<sub>3</sub>)As<sup>DipTer</sup></b> | -57.6                 | -49.6                 | -13.8                   | -11.8                   |
| <b>Cp<sub>2</sub>Zr(PMe<sub>3</sub>)As<sup>DipTer</sup></b> | 20.8                  | -33.9                 | 5.0                     | -8.1                    |

### 5.2.2 Decomposition of phospha-Wittig reagents to formal CH activation products

As outlined in Section 3 of the SI in the case of Mes\*- and <sup>DipTer</sup>-substituted phospha-Wittig reagents no conversion to the desired titanocene phosphinidenes was observed.

In case of the Mes\* phospha-Wittig reagent **2a** instead the clean conversion into a phosphaindane species was detected. The thermodynamic values for this formal CH-activation process on a CH group of the sterically loaded substituent clearly show this step, in the case of the Mes\* substituent, to be the thermodynamically preferred compared to the formation of the phosphinidene complex. Furthermore, the endothermic reaction enthalpies in case of the <sup>Mes</sup>Ter- and <sup>Dip</sup>Ter-derivatives explain the absence of analogous decomposition reactions.

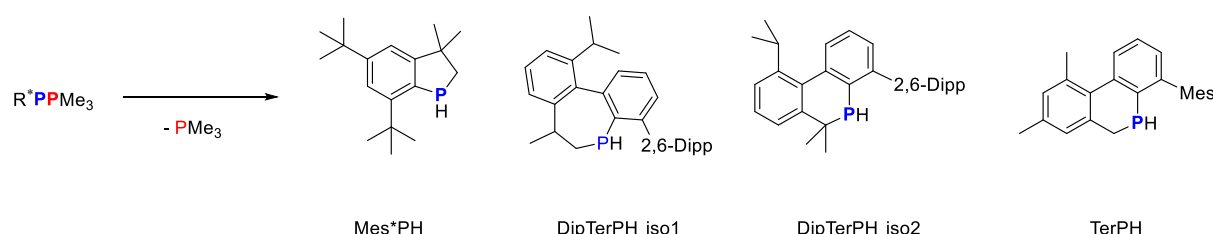

**Scheme S2:** Calculated reaction sequence to formal CH-activation products.

**Table S5.** Summary of calculated thermodynamic values for the formation of formal CH activation products.

| Compound                  | $\Delta_R H$ [kJ/mol] | $\Delta_R G$ [kJ/mol] | $\Delta_R H$ [kcal/mol] | $\Delta_R G$ [kcal/mol] |
|---------------------------|-----------------------|-----------------------|-------------------------|-------------------------|
| <sup>Mes</sup> TerPH      | 1.7                   | -45.0                 | 0.4                     | -10.7                   |
| <sup>Dip</sup> TerPH iso1 | 5.4                   | -42.2                 | 1.3                     | -10.1                   |
| <sup>Dip</sup> TerPH iso2 | 9.5                   | -39.9                 | 2.3                     | -9.5                    |
| Mes*PH                    | -66.4                 | -116.5                | -15.9                   | -27.9                   |

### 5.2.3 Report of total enthalpies and energies for all calculated molecules

**Table S6.** Summary of thermodynamic data of all calculated compounds, if different isomers were considered only the minimum isomer (marked with \*) was used for thermodynamic calculations.

| Compound                                         | Nim<br>ag | HF           | ZPE<br>[kcal/mol] | H <sub>tot</sub> [a.u.] | G <sub>tot</sub> [a.u.] |
|--------------------------------------------------|-----------|--------------|-------------------|-------------------------|-------------------------|
| H <sub>2</sub>                                   | 0         | -1.1710938   | 6.211710          | -1.157890               | -1.172736               |
| C <sub>2</sub> (SiMe <sub>3</sub> ) <sub>2</sub> | 0         | -894.3438671 | 145.050420        | -894.094213             | -894.159269             |
| PMe <sub>3</sub>                                 | 0         | -460.9178429 | 70.239730         | -460.798299             | -460.834131             |

|                                                                                         |   |               |            |              |              |
|-----------------------------------------------------------------------------------------|---|---------------|------------|--------------|--------------|
| pyridine                                                                                | 0 | -248.111213   | 55.723280  | -248.017208  | -248.049810  |
| <sup>Mes</sup> TerPH                                                                    | 0 | -1270.310053  | 261.540350 | -1269.868360 | -1269.948021 |
| <sup>Dip</sup> TerPH iso1                                                               | 0 | -1506.022004  | 369.933810 | -1505.400794 | -1505.492960 |
| <sup>Dip</sup> TerPH iso2                                                               | 0 | -1506.019420  | 369.098070 | -1505.399231 | -1505.492091 |
| <sup>Mes</sup> *PH                                                                      | 0 | -1044.194176  | 267.013690 | -1043.746549 | -1043.816315 |
| Cp <sub>2</sub> Ti(C <sub>2</sub> (SiMe <sub>3</sub> ) <sub>2</sub> )                   | 0 | -2130.617297  | 251.521230 | -2130.187530 | -2130.275546 |
| Cp <sub>2</sub> Zr(C <sub>2</sub> (SiMe <sub>3</sub> ) <sub>2</sub> )py                 | 0 | -1576.468978  | 308.366770 | -1575.942928 | -1576.042481 |
| <sup>Mes</sup> TerPMe <sub>3</sub>                                                      | 0 | -1731.2328654 | 333.781820 | -1730.667291 | -1730.765023 |
| <sup>Dip</sup> TerPMe <sub>3</sub>                                                      | 0 | -1966.946423  | 442.40777  | -1966.201131 | -1966.311015 |
| <sup>Mes</sup> *PMe <sub>3</sub>                                                        | 0 | -1505.091645  | 340.16317  | -1504.519546 | -1504.606055 |
| <sup>Mes</sup> TerAsPMe <sub>3</sub>                                                    | 0 | -3625.6173707 | 333.075840 | -3625.052389 | -3625.151929 |
| <sup>Dip</sup> TerAsPMe <sub>3</sub>                                                    | 0 | -3861.33058   | 441.73408  | -3860.585878 | -3860.69717  |
| Cp <sub>2</sub> Ti(PMe <sub>3</sub> ) <sup>P<sup>Mes</sup>Ter</sup> iso1                | 0 | -2967.5287754 | 441.445210 | -2966.781450 | -2966.899194 |
| Cp <sub>2</sub> Ti(PMe <sub>3</sub> ) <sup>P<sup>Mes</sup>Ter</sup> iso2                | 0 | -2967.5287754 | 441.445220 | -2966.781450 | -2966.899194 |
| Cp <sub>2</sub> Ti(PMe <sub>3</sub> ) <sup>P<sup>Mes</sup>Ter</sup> trip on sin geom sp | 2 | -2967.4892274 | 440.593330 | -2966.744298 | -2966.861182 |
| Cp <sub>2</sub> Ti(PMe <sub>3</sub> ) <sup>MesPTer</sup> trip opt                       | 0 | -2967.5152634 | 440.920400 | -2966.768276 | -2966.888126 |
| Cp <sub>2</sub> Ti(PMe <sub>3</sub> ) <sup>P<sup>Dip</sup>Ter</sup>                     | 0 | -3203.240121  | 550.34371  | -3202.31272  | -3202.441707 |
| Cp <sub>2</sub> Ti(PMe <sub>3</sub> )P <sup>Mes</sup> *                                 | 0 | -2741.377354  | 447.6102   | -2740.623446 | -2740.731506 |
| Cp <sub>2</sub> Zr(PMe <sub>3</sub> ) <sup>P<sup>Mes</sup>Ter</sup>                     | 0 | -2165.2388170 | 440.25904  | -2164.492634 | -2164.613202 |
| Cp <sub>2</sub> Ti(PMe <sub>3</sub> )As <sup>MesTer</sup>                               | 0 | -4861.916139  | 440.76626  | -4861.169376 | -4861.289636 |
| Cp <sub>2</sub> Zr(PMe <sub>3</sub> )As <sup>MesTer</sup>                               | 0 | -4059.6244079 | 439.69117  | -4058.878697 | -4059.000337 |
| Cp <sub>2</sub> Ti(PMe <sub>3</sub> )As <sup>DipTer</sup> 01                            | 0 | -5097.627992  | 549.63502  | -5096.701148 | -5096.832328 |
| Cp <sub>2</sub> Ti(PMe <sub>3</sub> )As <sup>DipTer</sup> trip opt                      | 0 | -5097.6146257 | 548.40668  | -5096.688912 | -5096.824735 |
| Cp <sub>2</sub> Ti(PMe <sub>3</sub> )As <sup>DipTer</sup> TS                            | 1 | -5097.6013088 | 548.96615  | -5096.675722 | -5096.807185 |
| Cp <sub>2</sub> Ti(PMe <sub>3</sub> )As <sup>DipTer</sup> -1(Charge) 2 (Mult)           | 0 | -5097.6504725 | 546.29912  | -5096.727902 | -5096.863079 |
| Cp <sub>2</sub> Zr(PMe <sub>3</sub> )As <sup>DipTer</sup>                               | 0 | -4295.335088  | 548.41375  | -4294.409468 | -4294.543496 |
| Cp <sub>2</sub> Ti(PMe <sub>3</sub> )As <sup>DipTer</sup> iso2                          | 0 | -5097.620866  | 549.66600  | -5096.694069 | -5096.824913 |
| Cp <sub>2</sub> Ti(PMe <sub>3</sub> ) <sup>MesPTer</sup> iso2                           | 0 | -2969.5267313 | 441.27406  | -2968.779323 | -2968.898715 |
| Cp <sub>2</sub> Ti(PMe <sub>3</sub> ) <sup>P<sup>Mes</sup>Ter</sup> trip on sin geom sp | 2 | -2969.4862653 | 440.53012  | -2968.741222 | -2968.858093 |
| Cp <sub>2</sub> Ti(PMe <sub>3</sub> ) <sup>MesPTer</sup> iso3 "TS Ter rot" sp           | 0 | -2969.4964196 | 439.29505  | -2968.756001 | -2968.862061 |

|                                                                                    |    |                      |           |              |              |
|------------------------------------------------------------------------------------|----|----------------------|-----------|--------------|--------------|
| Cp <sub>2</sub> Ti(PMe <sub>3</sub> )As <sup>Dip</sup> Ter                         | 0  | -5100.0683280        | 549.61907 | -5099.141199 | -5099.273392 |
| Cp <sub>2</sub> Ti(PMe <sub>3</sub> )As <sup>Dip</sup> Ter_<br>trip on sin geom sp | 1  | -5100.0315314        | 549.07103 | -5099.105687 | -5099.2391   |
| Complex II singlet opt                                                             | 0  | -3331.8877943        | 762.2345  | -3330.605817 | -3330.770986 |
| Complex II triplet sp                                                              |    | Did not<br>converged |           |              |              |
| Complex III singlet<br>opt                                                         | 0  | -3419.5232041        | 630.65398 | -3418.461361 | -3418.602137 |
| Complex III triplet sp                                                             | 2  | -3419.4770355        | 629.60201 | -3418.417837 | -3418.557335 |
| Complex IV singlet<br>opt                                                          | 0  | -2167.1455579        | 439.98482 | -2166.399405 | -2166.52218  |
| Complex IV triplet sp                                                              | 3  | -2167.0884977        | 438.92127 | -2166.345958 | -2166.464271 |
| Complex V singlet<br>opt                                                           | 0  | -2354.539857         | 399.7258  | -2353.861838 | -2353.976107 |
| Complex V triplet sp                                                               | 6  | -2354.458006         | 396.44008 | -2353.788477 | -2353.895104 |
| Complex II singlet svp<br>on tzvp structure                                        | 29 | -3329.151259         | 761.78629 | -3327.88572  | -3328.017315 |
| Complex II triplet sp                                                              | 30 | -3329.10444          | 760.54984 | -3327.840953 | -3327.974888 |

### 5.3 Bonding analysis of Cp<sub>2</sub>Ti(PMe<sub>3</sub>)P<sup>Mes</sup>Ter (3) and Cp<sub>2</sub>Ti(PMe<sub>3</sub>)As<sup>Dip</sup>Ter (5)

In this chapter, we summarize the most important results from a series of different bonding analyses to gain a deeper insight into the electronic situation of the respective phosphinidine (**3**) and arsinidene (**5**) complexes. These calculations were performed on the molecular structures optimized at B3LYP/GD3BJ/def2tzvp level of theory. To verify the chosen method, we compared selected bond parameters with the metrical parameters obtained by single crystal X-Ray crystallography.

**Table S7.** Deviations of the calculated structures from the experimental molecular structure of Cp<sub>2</sub>Ti(PMe<sub>3</sub>)PTer (**3**).

| Bonding parameter   | SC-XRD | B3LYP/GD3BJ/def2svpp |        | B3LYP/GD3BJ/def2tzvp |        |
|---------------------|--------|----------------------|--------|----------------------|--------|
| Ti-PMe <sub>3</sub> | 2.569  | 2.550                | -0.019 | 2.552                | -0.017 |
| Ti-PTer             | 2.423  | 2.334                | -0.089 | 2.335                | -0.088 |

|                    |          |          |       |          |       |
|--------------------|----------|----------|-------|----------|-------|
| <i>P-CTer</i>      | 1.842    | 1.852    | 0.010 | 1.842    | 0.000 |
| <i>P-Ti-P</i>      | 86.820   | 88.940   | 2.120 | 89.650   | 2.830 |
| <i>Ti-P-CTer</i>   | 122.110  | 123.590  | 1.480 | 124.420  | 2.310 |
| <i>P-Ti-P-CTer</i> | -119.710 | -116.490 | 3.220 | -115.520 | 4.190 |

**Table S8.** Deviations of the calculated structures from the experimental molecular structure of  $\text{Cp}_2\text{Ti}(\text{PMe}_3)\text{As}^{\text{Dip}}\text{Ter}$  (**5**) (For this analysis, we compare only the values of the best resolved molecule 1 among the three independent experimentally determined, Figure S2).

| Bonding parameter         | SC-XRD | 01/B3LYP/GD3BJ/def2svp |        | 01/B3LYP/GD3BJ/def2tzvp |        |
|---------------------------|--------|------------------------|--------|-------------------------|--------|
| <i>Ti-PMe<sub>3</sub></i> | 2.555  | 2.545                  | -0.010 | 2.546                   | -0.009 |
| <i>Ti-AsDipTer</i>        | 2.473  | 2.441                  | -0.032 | 2.446                   | -0.027 |
| <i>As-CDipTer</i>         | 1.989  | 1.994                  | 0.005  | 1.992                   | 0.003  |
| <i>P-Ti-As</i>            | 88.05  | 87.27                  | -0.78  | 87.53                   | -0.52  |
| <i>Ti-As-CDipTer</i>      | 121.73 | 119.99                 | -1.74  | 120.68                  | -1.05  |
| <i>P-Ti-As-CDipTer</i>    | 115.20 | 115.04                 | -0.16  | 115.01                  | -0.19  |

**Table S9.** Deviations of the calculated structures from the experimental molecular structure of  $\text{DipTerAsAs}^{\text{Dip}}\text{Ter}$  (**6\_i**).

| Bonding parameter | SC-XRD  | 01/B3LYP/GD3BJ/def2svp |        | 01C2h/B3LYP/GD3BJ/def2svp |        |
|-------------------|---------|------------------------|--------|---------------------------|--------|
| <i>As-As</i>      | 2.268   | 2.271                  | 0.003  | 2.272                     | 0.004  |
| <i>As-C</i>       | 1.990   | 2.005                  | 0.015  | 2.005                     | 0.015  |
| <i>C-As-As</i>    | 101.150 | 101.660                | 0.510  | 101.660                   | 0.510  |
| <i>As-C-C</i>     | 120.890 | 120.310                | -0.580 | 120.310                   | -0.580 |
| <i>C-As-As-C</i>  | 180.000 | 180.000                | 0.000  | 180.000                   | 0.000  |
| <i>C-C-As-As</i>  | 95.730  | 95.420                 | -0.310 | 95.140                    | -0.590 |

We found two different energetically identical isomers of  $\text{Cp}_2\text{Ti}(\text{PMe}_3)\text{P}^{\text{Mes}}\text{Ter}$  (**3**), which can be transformed into each other by rotation of the sterically demanding terphenyl substituent around the P–C axis. In the case of  $\text{Cp}_2\text{Ti}(\text{PMe}_3)\text{As}^{\text{Dip}}\text{Ter}$  (**5**) we found two energetically different but similar isomers, which can be transferred via an formal swing through of the arsinidene into each other. The activation barrier of the isomerisation in the case of **5** is significant lower compared to that of **3**, which might give an explanation for the broader resonances in the NMR spectra of compound **5**.

**Table S10.** Summary of calculated thermodynamic values for a rotation of the terphenyl ligand around the P–C axis.

| Rotational Barrier                                                           | $\Delta_R H$<br>[kJ/mol] | $\Delta_R G$<br>[kJ/mol] | $\Delta_R H$<br>[kcal/mol] | $\Delta_R G$<br>[kcal/mol] |
|------------------------------------------------------------------------------|--------------------------|--------------------------|----------------------------|----------------------------|
| Cp <sub>2</sub> Ti(PMe <sub>3</sub> )P <sup>Me</sup> sTer<br>"TS Ter rot" sp | 61.2                     | 96.2                     | 14.6                       | 23.0                       |
| Cp <sub>2</sub> Ti_AsDipTer_PMe <sub>3</sub> "TS DipTer<br>swing through"    | 66.8                     | 66.0                     | 16.0                       | 15.8                       |

### 5.3.1 NBO analysis and Natural Molecular Orbitals NLMOs of **3** and **5**.

NBO6.0 analyses of the B3LYP/GD3BJ/def2tzvp optimized structures of **3** and **5** were performed to analyse the natural localized molecular orbitals (NLMO). The NBO routine found a double bond between P(82) and Ti(84) in **3**, in agreement with the Lewis structure in Scheme S1. It is worth to note that this  $\pi$ -type NBO as well as the LP at P(82) are only occupied by approx. 1.8 electrons. At this point it should be mentioned that the occupations in arsinidene complex **5** behave in a similar way. This could be in general an indicator for a delocalized double bond or for a biradical character of the Ti=P or Ti=As bonds (as outlined earlier), which is not well represented in the NBO picture. Based on this theory, the condensed NLMO analyses (listed below) clearly characterizes the Ti(84)-P(83)Me<sub>3</sub> bond as a dative bond, with a major contribution (74%) of sp-hybrid orbitals at the phosphorus atom. We found two different types of Ti(84)-P(82) bonds in agreement with the double bond character. The Ti-P  $\sigma$ -bond mainly consists of sp<sup>3</sup> type hybrid at phosphorus and a d-type orbital at the titanium center with small s orbital contributions. This Ti(84)-P(82) NLMO shows only small contributions from the carbon atom of the terphenyl substituent (1.34 %). The second Ti(84)-P(82) NLMO is best described as a  $\pi$ -type Ti=P bond consisting of pure p orbital at phosphorus and pure d orbital character at the titanium center. This Ti(84)-P(82) NLMO shows only small contributions from the phosphorus atom of the PMe<sub>3</sub> ligand (1.35 %). Furthermore, the lone pair (LP) at the phosphinidene phosphorus is best described as sp-hybrid orbital.

When evaluating the NLMO's of the arsinidene complex  $\text{Cp}_2\text{Ti}(\text{PMe}_3)\text{As}^{\text{Dip}}\text{Ter}$  (**5**), it is immediately noticeable that the natural localized bonding orbitals described here are very similar to those of the lighter phosphinidene derivative **3**. Furthermore, it is noticeable that no remarkable contributions of the adjacent carbon atoms are found (threshold value > 1.3%). A closer look reveals only small differences in the hybridization of the arsenic lone pair with a  $\text{sp}^{0.5}$  hybridization compared to the  $\text{sp}$  hybrid on the phosphinidene P atom as well as the  $\text{sp}^4$  hybrid on As in the Ti-As  $\sigma$ -bond compared to the  $\text{sp}^3$  hybrid on the comparable P atom.

**Table S11.** Summary of selected NLMO's of  $\text{Cp}_2\text{Ti}(\text{PMe}_3)^{\text{Mes}}\text{PTer}$  (**3**).

|                                                                                                                                                                                                                                                                                                                      |                                                                                                                                                                                                                                                                                                                                                                               |
|----------------------------------------------------------------------------------------------------------------------------------------------------------------------------------------------------------------------------------------------------------------------------------------------------------------------|-------------------------------------------------------------------------------------------------------------------------------------------------------------------------------------------------------------------------------------------------------------------------------------------------------------------------------------------------------------------------------|
| 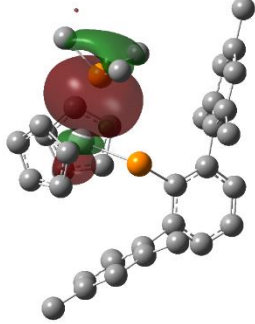                                                                                                                                                                                                                                   | 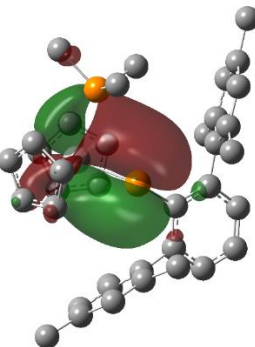                                                                                                                                                                                                                                                                                           |
| <p>Shortened NLMO Analysis of Ti(84)-P(83)Me<sub>3</sub> <math>\sigma</math>-bond (threshold &gt; 1.3%)</p> <p>159. (2.00000) 96.7058% BD ( 1) P 83-Ti 84</p> <p>73.856% P 83 s( 45.08%)p 1.21( 54.77%)d 0.00( 0.14%) f 0.00( 0.01%)</p> <p>23.293% Ti 84 s( 13.21%)p 0.01( 0.15%)d 6.56( 86.62%) f 0.00( 0.02%)</p> | <p>Shortened NLMO Analysis of Ti(84)-P(82)Ter <math>\pi</math>-bond (threshold &gt; 1.3%)</p> <p>158. (2.00000) 91.5439% BD ( 2) P 82-Ti 84</p> <p>47.393% P 82 s( 0.29%)p99.99( 99.43%)d 0.90( 0.26%) f 0.07( 0.02%)</p> <p>1.345% P 83 s( 0.08%)p99.99( 91.94%)d99.99( 7.70%) f 3.60( 0.28%)</p> <p>44.415% Ti 84 s( 0.01%)p 1.00( 0.02%)d99.99( 99.96%) f 0.50( 0.01%)</p> |

|                                                                                                                                                                                                                                                                                                                                                                                   |                                                                                                                                                                                                                                                                                                                                              |
|-----------------------------------------------------------------------------------------------------------------------------------------------------------------------------------------------------------------------------------------------------------------------------------------------------------------------------------------------------------------------------------|----------------------------------------------------------------------------------------------------------------------------------------------------------------------------------------------------------------------------------------------------------------------------------------------------------------------------------------------|
| 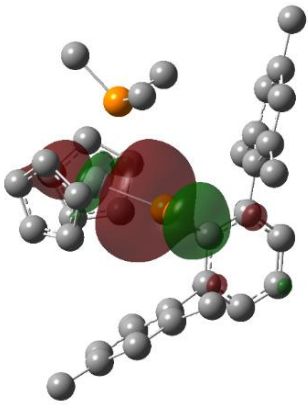                                                                                                                                                                                                                                                                                                 | 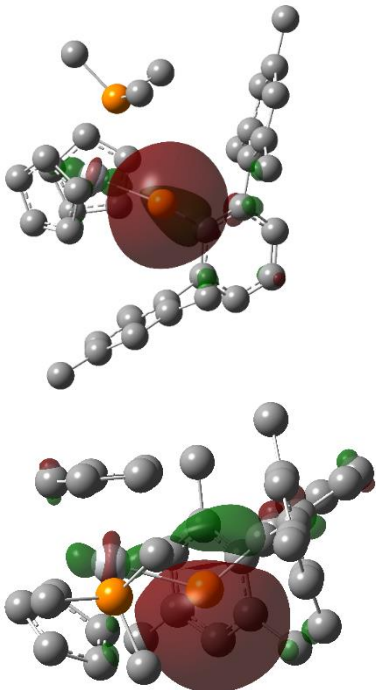                                                                                                                                                                                                                                                           |
| <p>Shortened NLMO Analysis of Ti(84)-P(82)Ter <math>\sigma</math>-bond (threshold &gt; 1.3%)</p> <p>157. (2.00000) 94.7179% BD ( 1) P 82-Ti 84</p> <p>1.343% C 1 s( 3.08%)p31.17( 95.91%)d 0.29( 0.90%) f 0.04( 0.11%)</p> <p>62.574% P 82 s( 24.57%)p 3.05( 75.05%)d 0.01( 0.35%) f 0.00( 0.04%)</p> <p>32.637% Ti 84 s( 8.90%)p 0.01( 0.06%)d 10.23( 91.03%) f 0.00( 0.01%)</p> | <p>Shortened NLMO Analysis of LP at P(82) (threshold &gt; 1.5%)</p> <p>59. (2.00000) 90.7432% LP ( 1) P 82</p> <p>1.612% C 1 s( 6.12%)p15.09( 92.32%)d 0.22( 1.35%) f 0.03( 0.21%)</p> <p>90.811% P 82 s( 61.69%)p 0.62( 38.26%)d 0.00( 0.06%) f 0.00( 0.00%)</p> <p>3.800% Ti 84 s( 20.03%)p 0.00( 0.02%)d 3.99( 79.89%) f 0.00( 0.06%)</p> |

**Table S12.** Summary of selected NLMO's of  $\text{Cp}_2\text{Ti}(\text{PMe}_3)^{\text{Dip}}\text{AsTer}$  (5).

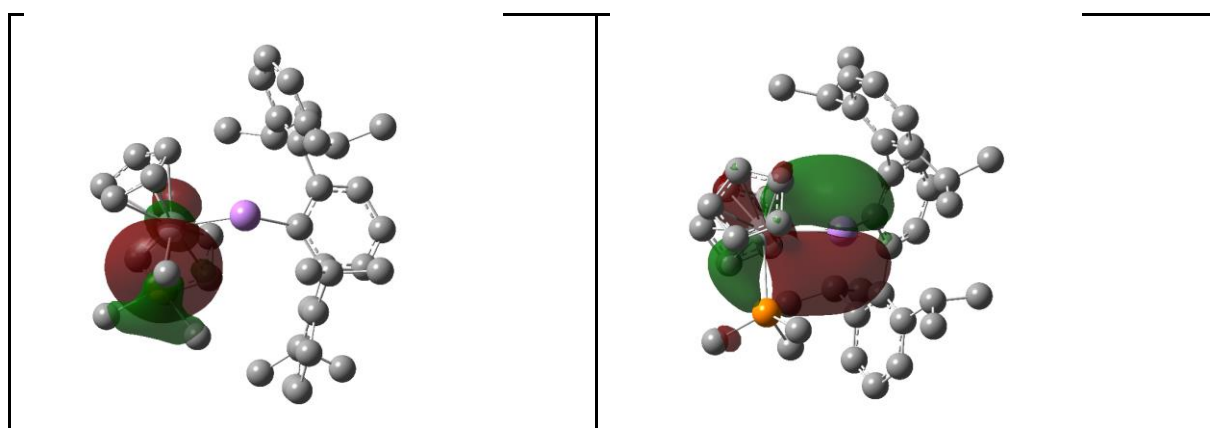

|                                                                                                                                                                                                                                                                                            |                                                                                                                                                                                                                                                                   |
|--------------------------------------------------------------------------------------------------------------------------------------------------------------------------------------------------------------------------------------------------------------------------------------------|-------------------------------------------------------------------------------------------------------------------------------------------------------------------------------------------------------------------------------------------------------------------|
| <p>Shortened NLMO Analysis of Ti(1)-P(55)Me<sub>3</sub> σ-bond (threshold &gt; 1.3%)</p> <p>75. (2.00000) 96.6234% BD ( 1)Ti 1- P 55<br/> 23.800% Ti 1 s( 13.04%)p 0.01( 0.13%)d 6.66( 86.81%) f 0.00( 0.02%)<br/> 73.231% P 55 s( 45.35%)p 1.20( 54.51%)d 0.00( 0.13%) f 0.00( 0.01%)</p> | <p>Shortened NLMO Analysis of Ti(1)-As(102)Ter π-bond (threshold &gt; 1.3%)</p> <p>44.421% Ti 1 s( 0.02%)p 1.29( 0.03%)d 99.99( 99.94%) f 0.51( 0.01%)<br/> 46.100% As102 s( 0.40%)p 99.99( 99.43%)d 0.41( 0.16%) f 0.04( 0.02%)</p>                              |
| 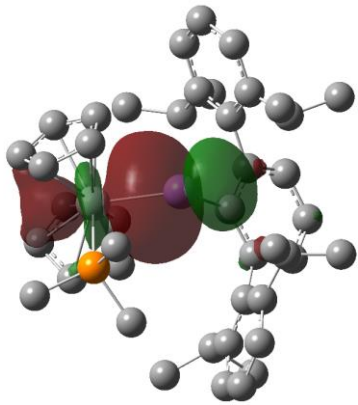                                                                                                                                                                                                         | 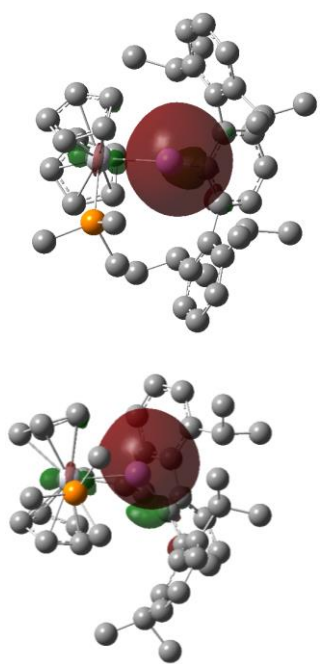                                                                                                                                                                               |
| <p>Shortened NLMO Analysis of Ti(1)-As(102)Ter σ-bond (threshold &gt; 1.3%)</p> <p>76. (2.00000) 94.7659% BD ( 1)Ti 1-As102<br/> 34.287% Ti 1 s( 9.19%)p 0.01( 0.09%)d 9.88( 90.71%) f 0.00( 0.02%)<br/> 60.877% As102 s( 20.37%)p 3.89( 79.29%)d 0.01( 0.30%) f 0.00( 0.03%)</p>          | <p>Shortened NLMO Analysis of LP at As(102) (threshold &gt; 1.5%)</p> <p>74. (2.00000) 93.0616% LP ( 1)As102<br/> 3.123% Ti 1 s( 19.71%)p 0.00( 0.01%)d 4.07( 80.23%) f 0.00( 0.06)<br/> 93.070% As102 s( 68.65%)p 0.46( 31.31%)d 0.00( 0.03%) f 0.00( 0.00%)</p> |

### 5.3.2 QT-AIM analysis of $\text{Cp}_2\text{Ti}(\text{PMe}_3)^{\text{Mes}}\text{PTer}$ (**3**) and $\text{Cp}_2\text{Ti}(\text{PMe}_3)\text{As}^{\text{Dip}}\text{Ter}$ (**5**)

QT-AIM analysis<sup>16</sup> for  $\text{Cp}_2\text{Ti}(\text{PMe}_3)^{\text{Mes}}\text{PTer}$  (**3**) revealed two Ti–P “bond” paths (Ti(84)–P(82) and Ti(84)–P(83)), in agreement with the Lewis resonance scheme (**Scheme S1**). In addition to the contour plot of the Laplacian of the electron density  $\nabla^2 r$  of Ti complex **3** we added the wiberg bond indices (WBI) next to the bond critical points in italic numbers (**Figure S20**). The WBI of 1.73 for the Ti(84)–P(82) bond clearly reveals a double bond on the basis of this theory. The QT-AIM analysis for  $\text{Cp}_2\text{Ti}(\text{PMe}_3)\text{As}^{\text{Dip}}\text{Ter}$  can be interpreted in the same manner (**Figure S21**). We found “bond” paths between the titanium center the phosphorus and arsenic atoms. Also in this case the WBI of the Ti(1)–As(102) bond with 1.72 clearly indicates a double bond within the framework of this theory.

**Figure S20:** Contour plot of the Laplacian of the electron density  $\nabla^2 r$  of Ti complex **3** in the P–Ti–P plane. Dashed lines indicate negative (local charge concentration), solid lines indicate positive values (local charge depletion). The Laplacian plot is overlaid with the molecular graph from QT-AIM analysis and wiberg bond indices (italic small numbers). Brown lines indicate bonding paths, blue dots correspond to bond critical points. Density from B3LYP/GD3BJ/def2tzvp calculation.

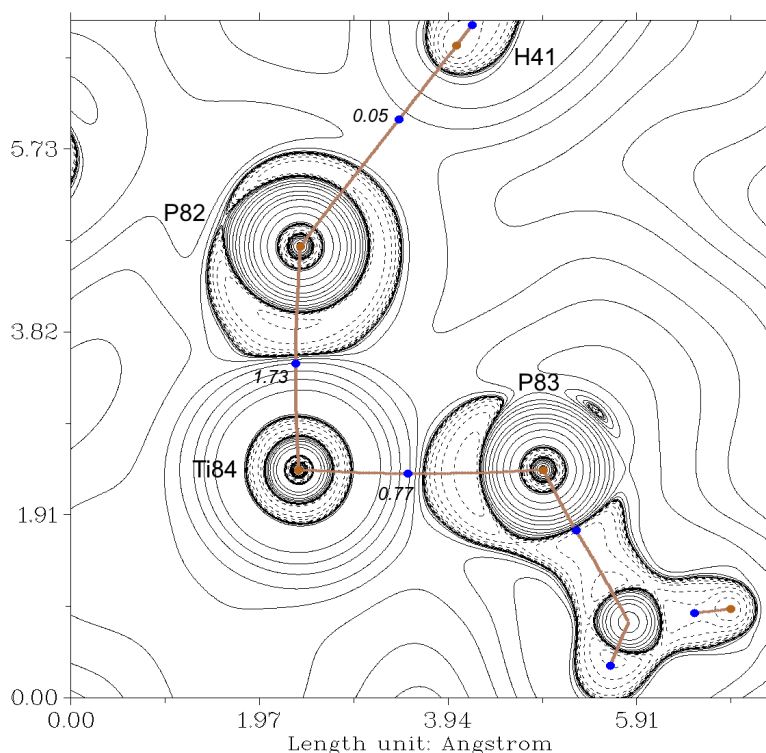

**Figure S21:** Contour plot of the Laplacian of the electron  $\nabla^2 r$  of Ti complex **5** in the P-Ti-As plane. Dashed lines indicate negative (local charge concentration), solid lines indicate positive values (local charge depletion). The Laplacian plot is overlaid with the molecular graph from QT-AIM analysis and wiberg bond indices (italic small numbers). Brown lines indicate bonding paths, blue dots correspond to bond critical points. Density from B3LYP/GD3BJ/def2tzvp calculation.

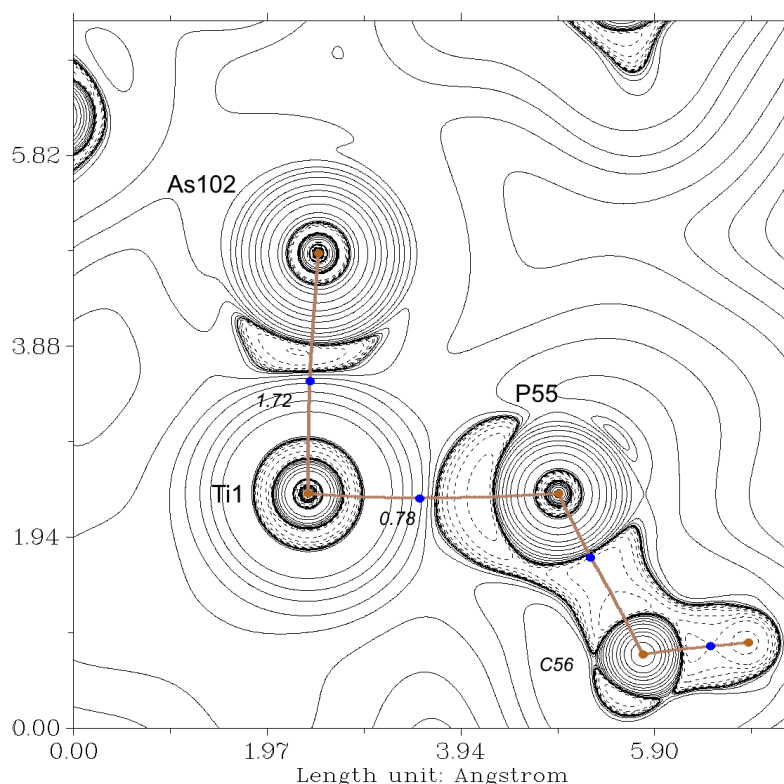

### 5.3.3 Electron Localisation Function of $\text{Cp}_2\text{Ti}(\text{PMe}_3)^{\text{Mes}}\text{P}^{\text{Ter}}$ (**3**) and $\text{Cp}_2\text{Ti}(\text{PMe}_3)\text{As}^{\text{Dip}}\text{Ter}$ (**5**)

To further classify the bonding situation in  $\text{Cp}_2\text{Ti}(\text{PMe}_3)^{\text{P}^{\text{Mes}}}\text{Ter}$  and  $\text{Cp}_2\text{Ti}(\text{PMe}_3)\text{As}^{\text{Dip}}\text{Ter}$  we had a closer look to the 3D-plots of the electron localization functions (ELF). The results from QT-AIM- and NBO-analysis are corroborated by ELF analysis (**Figure S22** and **Figure S23**) showing a dative  $\text{Ti}(84)\text{-P}(83)\text{Me}_3$  bond and a lone pair at the  $\text{P}(82)$  atom. Furthermore, there is a dumbbell-shaped ELF between the titanium center and the phosphinidene phosphorus atom which indicates a  $\text{Ti}=\text{P}$  double bond based on this theory. The 3D plot of the ELF for  $\text{Cp}_2\text{Ti}(\text{PMe}_3)\text{As}^{\text{Dip}}\text{Ter}$  can be described in the same manner. We find a dative  $\text{Ti1-P55}$  bond as well as a lone pair on  $\text{As102}$  and a dumbbell-shaped ELF between  $\text{Ti}(1)\text{-As}(102)$ .

**Figure S22:** 3D-ELF plot of the central  $\text{Ti}(\text{PMe}_3)\text{PAr}$  unit in  $\text{Cp}_2\text{Ti}(\text{PMe}_3)\text{P}^{\text{Mes}}\text{Ter}$  (**3**).

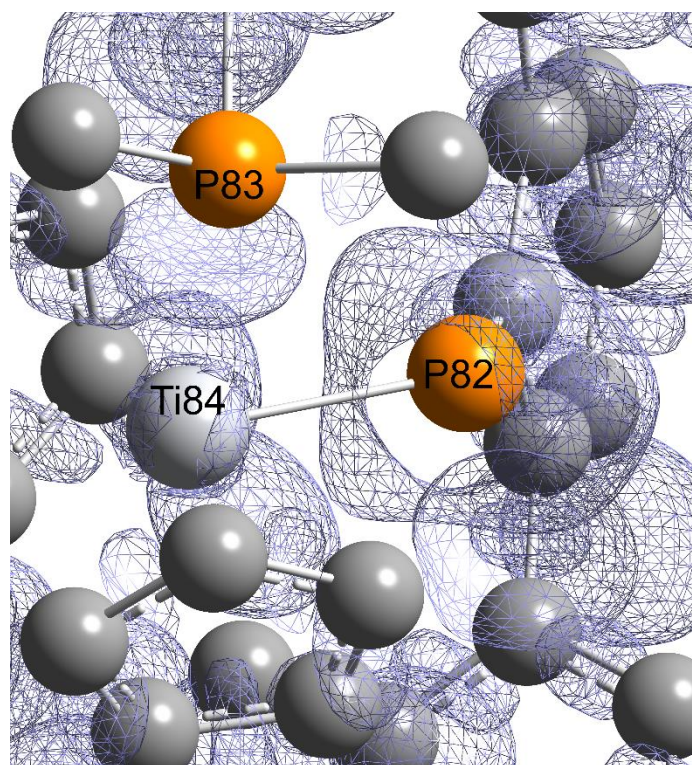

**Figure S23:** 3D-ELF plot of the central  $\text{Ti}(\text{PMe}_3)\text{AsAr}$  unit in  $\text{Cp}_2\text{Ti}(\text{PMe}_3)\text{As}^{\text{Dip}}\text{Ter}$  (**5**).

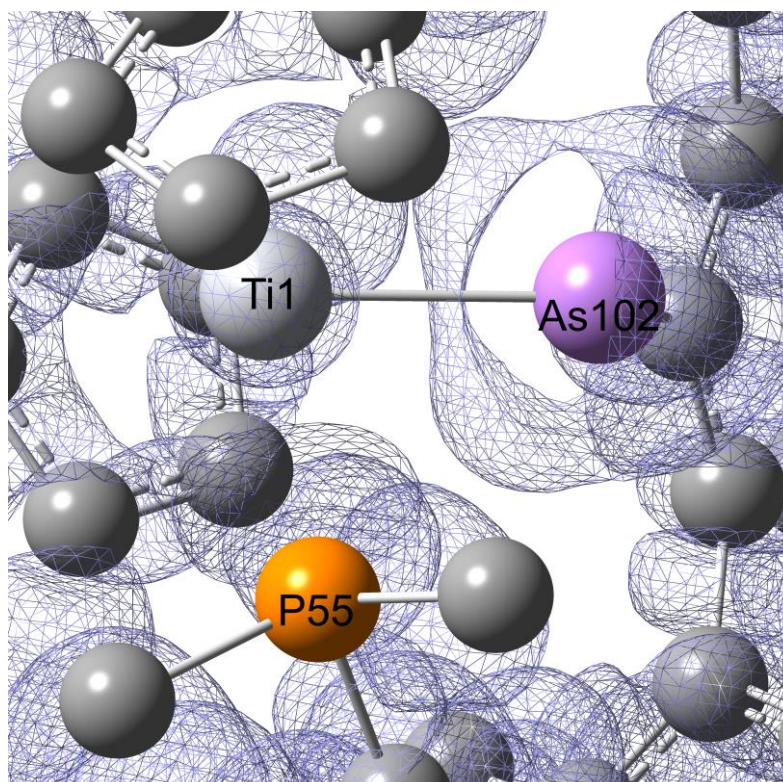

#### 5.3.4 Proof of the wavefunction stability of $\text{Cp}_2\text{Ti}(\text{PMe}_3)\text{P}^{\text{Mes}}\text{Ter}$ (**3**), $\text{Cp}_2\text{Ti}(\text{PMe}_3)\text{As}^{\text{Dip}}\text{Ter}$ (**5**) and comparable literature complexes II-V

In order to proof the correctness of the electronical description of the complexes **3** and **5** described here and selected literature compounds **II-V**, we first proofed the stability of the Kohn-Sham wavefunctions of the performed DFT calculations (B3LYP/GD3BJ/def2svp of def2tzvp). We found in all investigated systems stable closed shell KS wavefunctions. To take the results from the NBO calculations into account, which gives indication of a potentially open shell singlet state (biradicaloid character), we next proofed the stability of the Hatree-Fock (HF) wavefunctions. To our surprise we find in all cases an RHF/UHF instability of these. With a closer look to the spin density of these optimised UHF calculations we notice in all cases opposing spin densities located at the metal center and the pnictogen atoms (**Table S13**). Moreover, we obtain high spin contaminations of the aromatic ligand systems. Nevertheless, these results are an indicator for considering those molecules as biradicaloid's, or in other words, bearing an antiferromagnetic coupled electron pair as  $\pi$ -bond system. Therefore, we performed simple Complete Active Space (CAS) calculations considering just two electrons in two orbitals (see next section). We choose the orbitals which are in line with the examined spin density plots as active space.

**Table S13.** Representation of the spindensity plots of the investigated compounds at isovalue 0.01.

|                   |                   |
|-------------------|-------------------|
| Compound <b>3</b> | Compound <b>5</b> |
|-------------------|-------------------|

|                                                                                    |                                                                                     |
|------------------------------------------------------------------------------------|-------------------------------------------------------------------------------------|
| 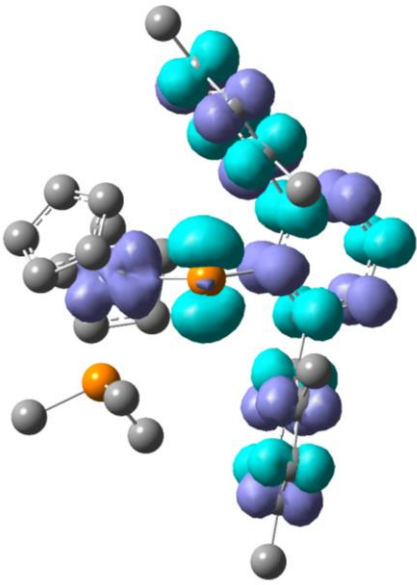  | 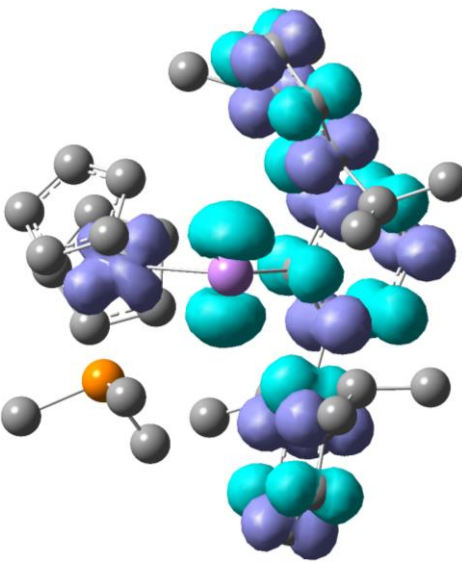  |
| Complex <b>II</b>                                                                  | Complex <b>III</b>                                                                  |
| 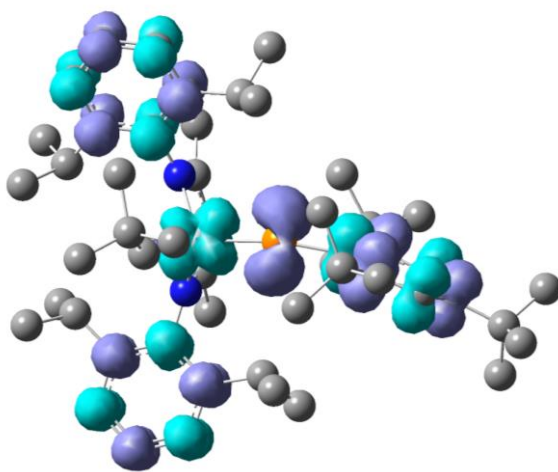 | 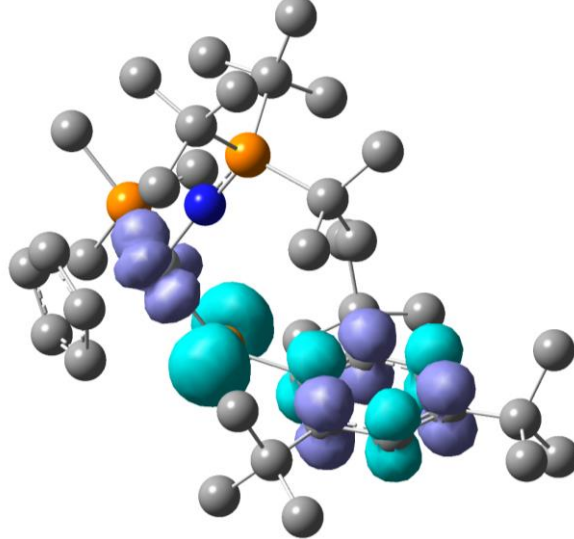 |
| Complex <b>IV</b>                                                                  | Complex <b>V</b>                                                                    |

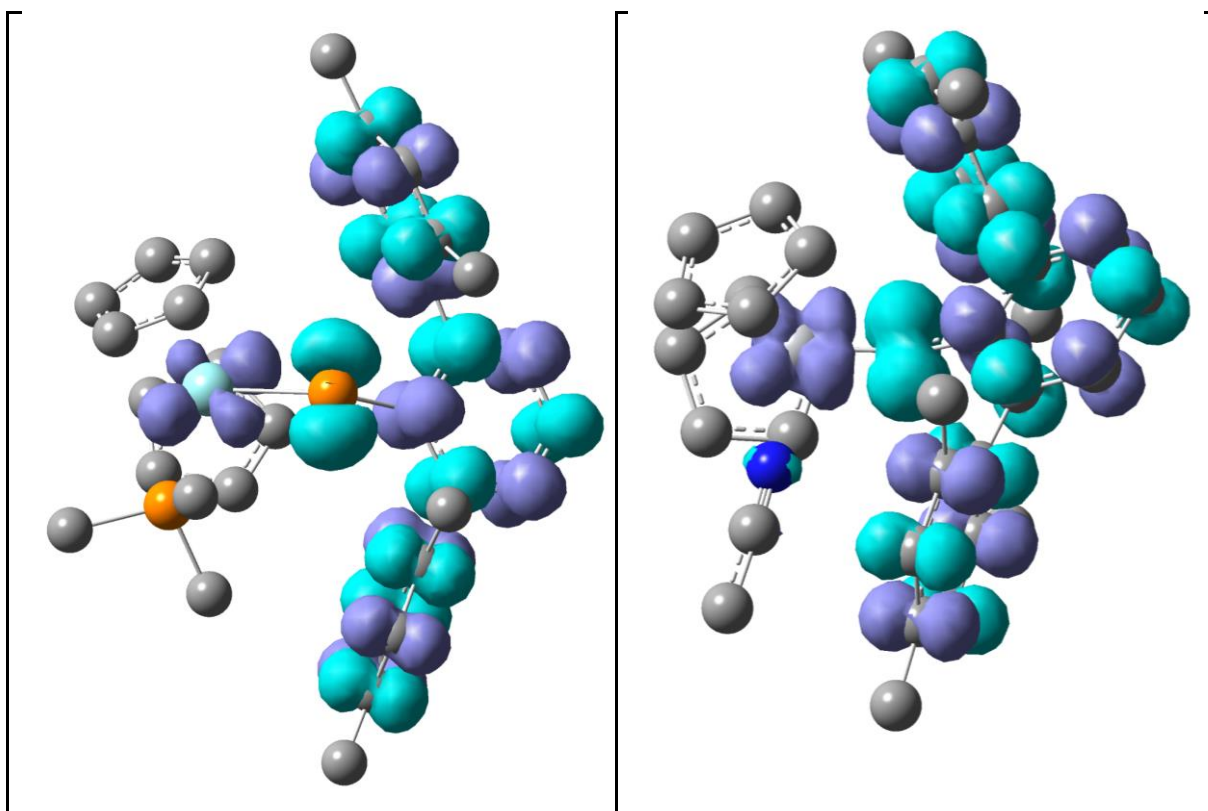

### 5.3.5 Biradical character of $\text{Cp}_2\text{Ti}(\text{PMe}_3)\text{P}^{\text{Mes}}\text{Ter}$ (3) and $\text{Cp}_2\text{Ti}(\text{PMe}_3)\text{As}^{\text{Dip}}\text{Ter}$ (5)

The “broken-symmetry” solution is not a true eigenfunction of the  $S^2$  operator. In fact, it may be considered as a 50:50 mixture of the singlet and triplet state, if the overlap between the singly occupied orbitals and spin polarisation are small.<sup>17</sup> The actual singlet wave function can then be expressed in terms of a linear combination of *two* “broken-symmetry” wave functions

$$^1\Psi = \frac{1}{\sqrt{2}} (|\cdots \chi_+ \overline{\chi_-}\rangle - |\cdots \overline{\chi_+} \chi_-\rangle)$$

where  $\chi_+$ ,  $\chi_-$  are the singly occupied orbitals and the overline indicates  $\beta$  spin. Therefore, the open-shell singlet must be described by a multi-reference wave function.

In the “broken-symmetry” picture, the singly occupied orbitals  $\chi_+$  and  $\chi_-$  are, in principle, localised orbitals formed by linear combinations of the (delocalised) canonical HOMO  $\phi_{\text{H}}$  and LUMO  $\phi_{\text{L}}$ :

$$\chi_{\pm} = \frac{1}{\sqrt{2}}(\phi_H \pm \phi_L)$$

Hence, the multi-reference wave function expressed in terms of the canonical MOs is given by

$${}^1\Psi = c_1|\cdots\phi_H^2\rangle + c_2|\cdots\phi_L^2\rangle$$

where the expansion coefficients  $c_i$  are the square roots of the relative weight of each determinant. This type of multi-determinant open-shell singlet wave function can be obtained by the Complete Active Space (CAS) SCF method and gives a qualitatively correct description of the electronic structure of a biradical. The biradical character can be evaluated as

$$\beta = \frac{2c_2^2}{c_1^2 + c_2^2}$$

where a value of  $\beta = 1$  indicates a "perfect" biradical with two electrons in two degenerate orbitals.<sup>18</sup> Smaller values indicate an increasing energy gap between HOMO and LUMO, and  $\beta \rightarrow 0$  indicates a closed-shell species.

Consequently, the smallest active space to properly describe a biradical is a CAS(2,2) calculation (*i.e.* two electrons in two orbitals). In case of compounds **3** and **5**, this calculation show that the contributions to the multi-determinant wave function are the two determinants placing two electrons either in the formal HOMO ( $\phi_1$ ) or LUMO ( $\phi_2$ ) lead to a biradical character of  $\beta = 37\%$  for  $\text{Cp}_2\text{Ti}(\text{PMe}_3)^{\text{Mes}}\text{PTer}$  (**3**) and  $40\%$  for  $\text{Cp}_2\text{Ti}(\text{PMe}_3)\text{As}^{\text{Dip}}\text{Ter}$  (**5**).

**Figure S24:** Schematic depiction of the active orbitals of a CAS(2,2) calculation (def2svp) of the  $\text{Cp}_2\text{Ti}(\text{PMe}_3)\text{P}^{\text{Mes}}\text{Ter}$  (**3**). The orbital localization scheme indicates that one of the radical centers is localized at Ti, while the other is localized at the phosphinidene phosphorus atom.

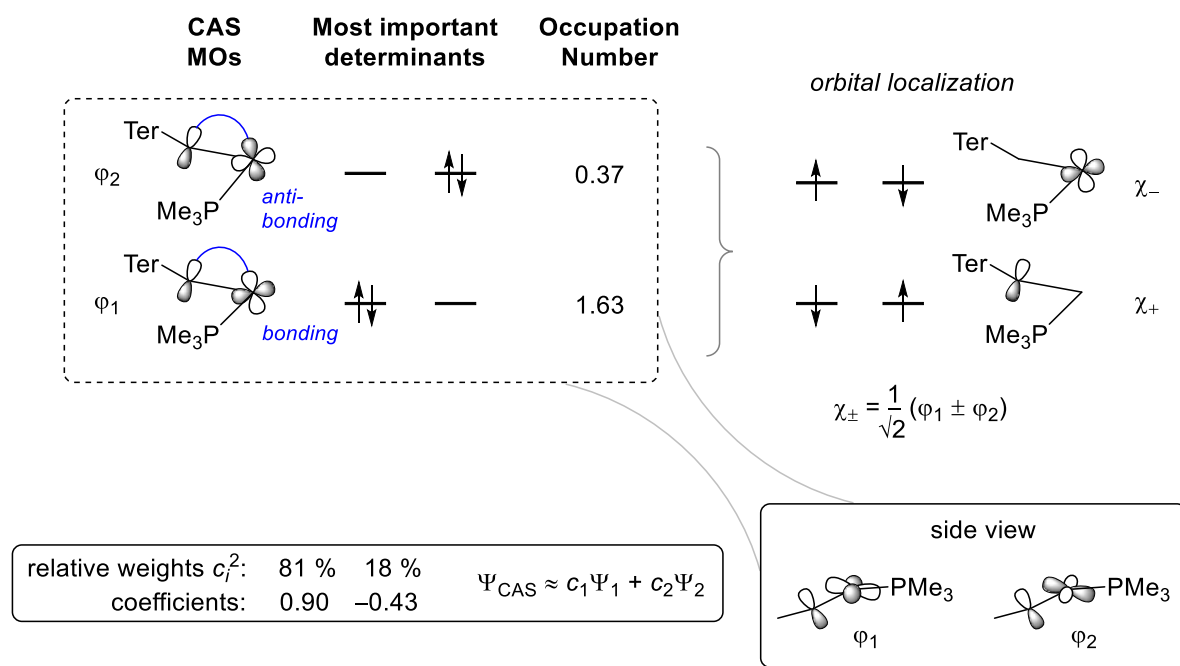

**Figure S25:** Schematic depiction of the active orbitals of a CAS(2,2) calculation (def2svp) of the  $\text{Cp}_2\text{Ti}(\text{PMe}_3)\text{As}^{\text{Dip}}\text{Ter}$  (**5**). The orbital localisation scheme indicates that one of the radical centres is localised at Ti, while the other is localised at the phosphinidene phosphorus atom.

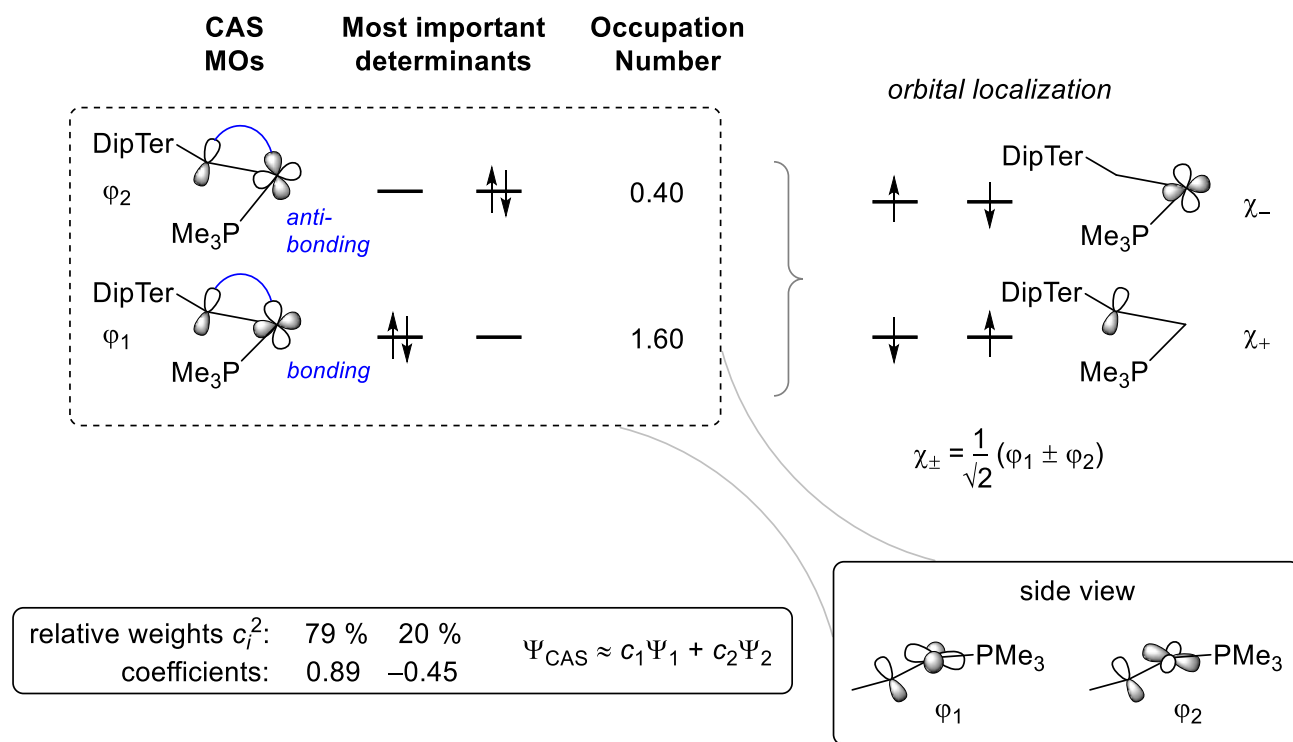

Hence, compounds **3** and **5** can be regarded as biradicals. The singlet states are calculated to be the ground states ( $\Delta E_{S-T} = -106.2$  kJ/mol for **3** and  $-96.6$  kJ/mol for **5**); i.e. the radical centres are strongly antiferromagnetically coupled. The calculated exchange coupling constants<sup>19</sup> are.

$$2J(\mathbf{3}) = E_S - E_T = -8881.2 \text{ cm}^{-1}$$

$$2J(\mathbf{5}) = E_S - E_T = -8075.9 \text{ cm}^{-1}$$

The radical centers are localized at Ti and on the phosphorus atom of the phosphinidene or arsenic atom of the arsinidene ligand (**Figure S24** and **Figure S25**), respectively. Therefore, the electronic structure can be understood as a complex between a formal Ti(III) fragment and a phosphorus or arsenic centered radical, whose "free" electrons are antiferromagnetically coupled. Therefore, complexes **3** and **5** are EPR-silent in their respective ground states. To proof the general description of group 4 pnictinidenes as biradicoloids we further performed the same calculations for the literature known complexes (**II-V**). Through the calculations of complex **II** and **V** we noticed two sets of formally Ti-E (E = P, N)  $\pi$ -bonds consisting of orthogonal d-shaped orbitals at titanium and p-shaped orbitals at the pnictogen atom. This was described in the original literature resulting in a pseudo Ti-P triple bond.<sup>20</sup> To take this into account we increased, in these complexes, the active space considering four electrons in four molecular orbitals (CAS(4,4)). This revealed in the complexes **II** and **V** the expected biradical character alongside a small degree of formally tetra radical character. It should be noted that the smaller CAS(2,2) calculations intrinsically lead to larger  $\beta$  values compared to larger active space calculations and may overestimate this value as they do not account for dynamic correlations. Nevertheless, we have summarized in **Table S14** the calculated occupation numbers of the orbitals considered. In the case of the CAS(2,2) calculations, these values of the  $\phi_L$  are mathematically identical with the beta value.

**Table S14.** Summary of all calculated biradical character  $\beta$  from CAS(2,2)/def2svp calculations and  $\Delta E_{S-T}$  (B3LYP/GD3BJ/def2tzvp).

| Compound                                                                | Occupation numbers                                                       | Singlet Triplet gap $\Delta E_{S-T}$ |
|-------------------------------------------------------------------------|--------------------------------------------------------------------------|--------------------------------------|
| Cp <sub>2</sub> Ti(PMe <sub>3</sub> )P <sup>Mes</sup> Ter ( <b>3</b> )  | $\phi_1 = 1.63$<br>$\phi_2 = 0.37$                                       | –106.2 kJ/mol                        |
| Cp <sub>2</sub> Ti(PMe <sub>3</sub> )As <sup>Dip</sup> Ter ( <b>5</b> ) | $\phi_1 = 1.60$<br>$\phi_2 = 0.40$                                       | –96.6 kJ/mol                         |
| Complex <b>II</b>                                                       | $\phi_1 = 1.88$<br>$\phi_2 = 1.85$<br>$\phi_3 = 0.15$<br>$\phi_4 = 0.12$ | –122.92 kJ/mol <sup>[a]</sup>        |
| Complex <b>III</b>                                                      | $\phi_1 = 1.67$<br>$\phi_2 = 0.33$                                       | –121.22 kJ/mol                       |
| Complex <b>IV</b>                                                       | $\phi_1 = 1.84$<br>$\phi_2 = 0.16$                                       | –149.81 kJ/mol                       |
| Complex <b>V</b>                                                        | $\phi_1 = 1.93$<br>$\phi_2 = 1.86$<br>$\phi_3 = 0.14$<br>$\phi_4 = 0.07$ | –214.90 kJ/mol                       |

[a] In case of this complex the def2tzvp calculation did not converged, therefore we calculated this value on the basis of single point def2svp calculations considering the optimised structure of the higher basis.

**Table S15.** Representation of the  $\phi_1$  and  $\phi_2$  of the CAS(2,2) calculations.

| Compound <b>3</b> $\phi_1$  | Compound <b>3</b> $\phi_2$  |
|-----------------------------|-----------------------------|
|                             |                             |
| Compound <b>5</b> $\phi_1$  | Compound <b>5</b> $\phi_2$  |
|                             |                             |
| Compound <b>11</b> $\phi_1$ | Compound <b>11</b> $\phi_2$ |

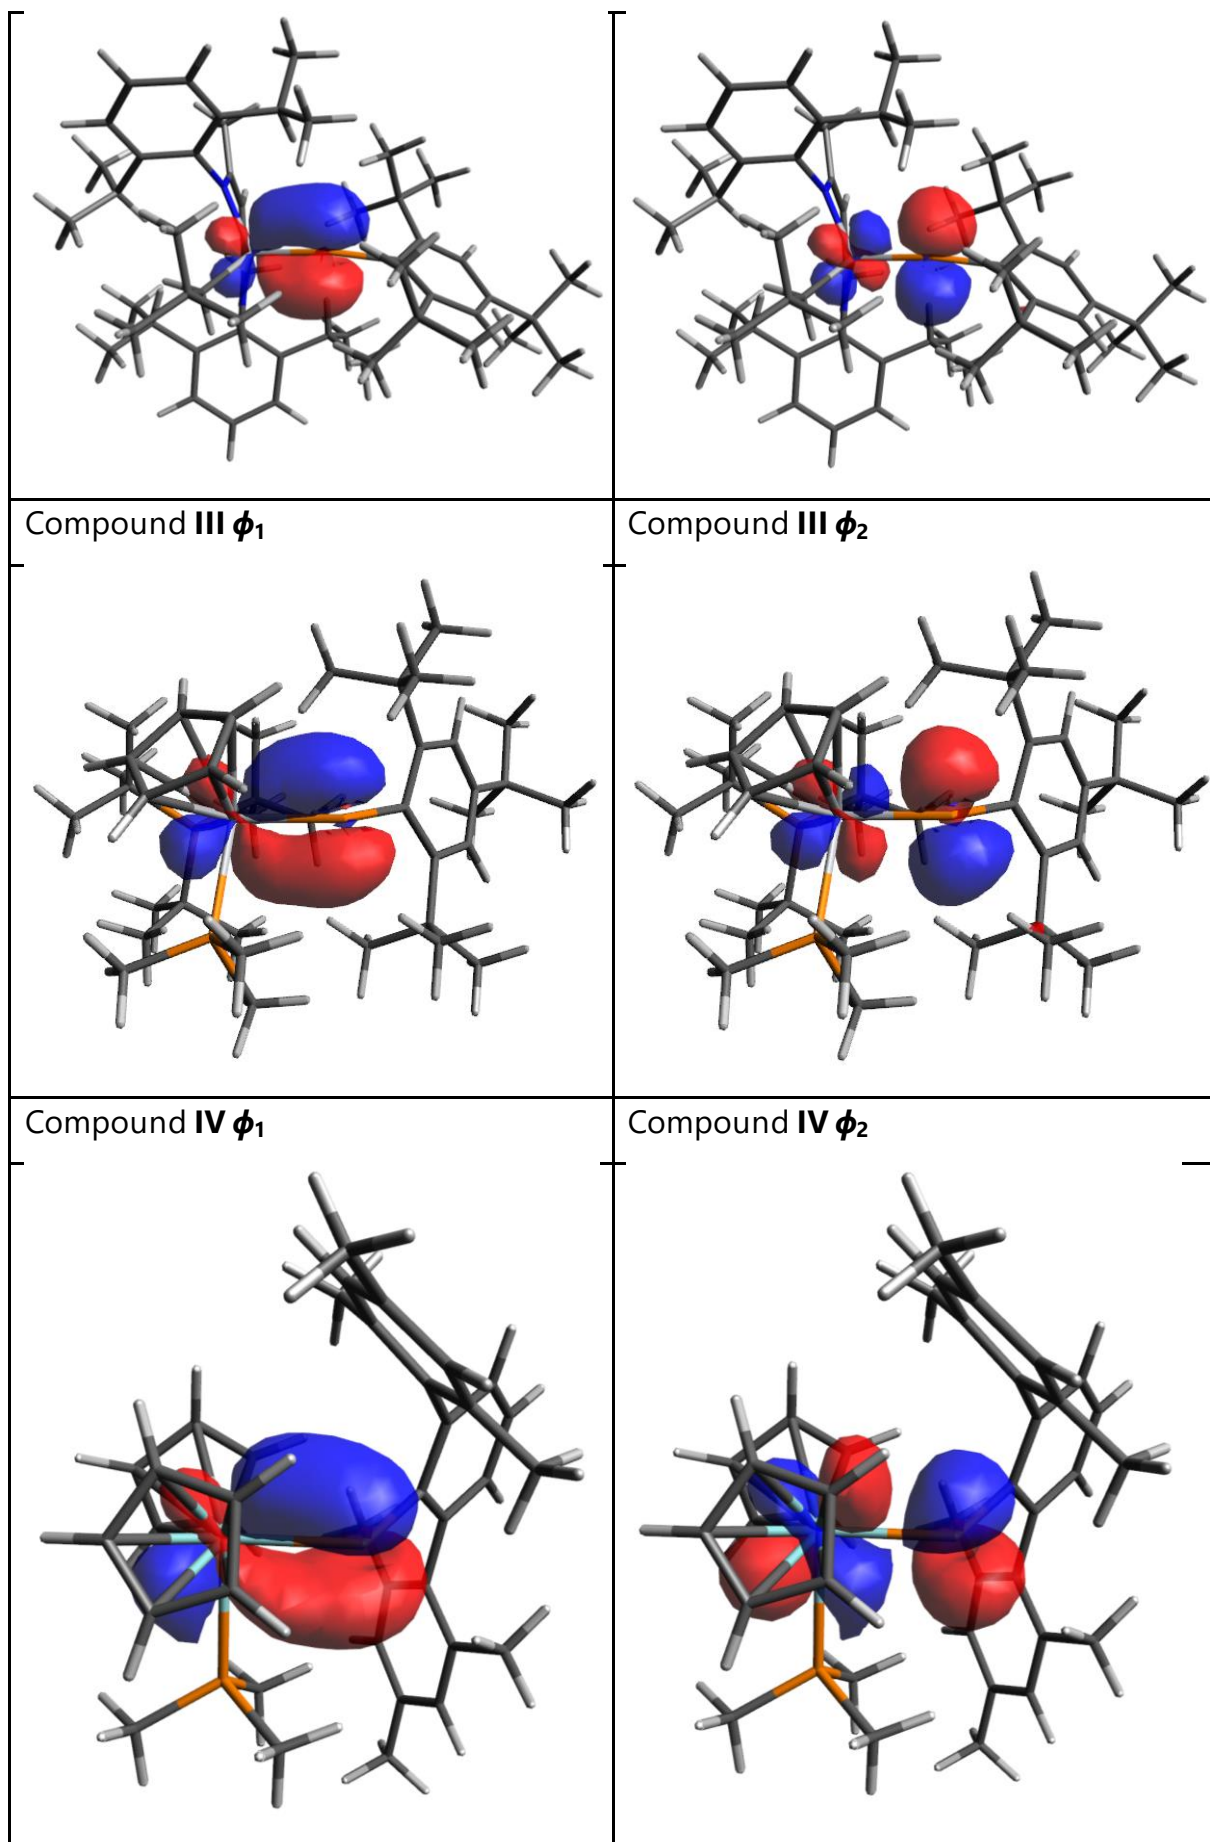

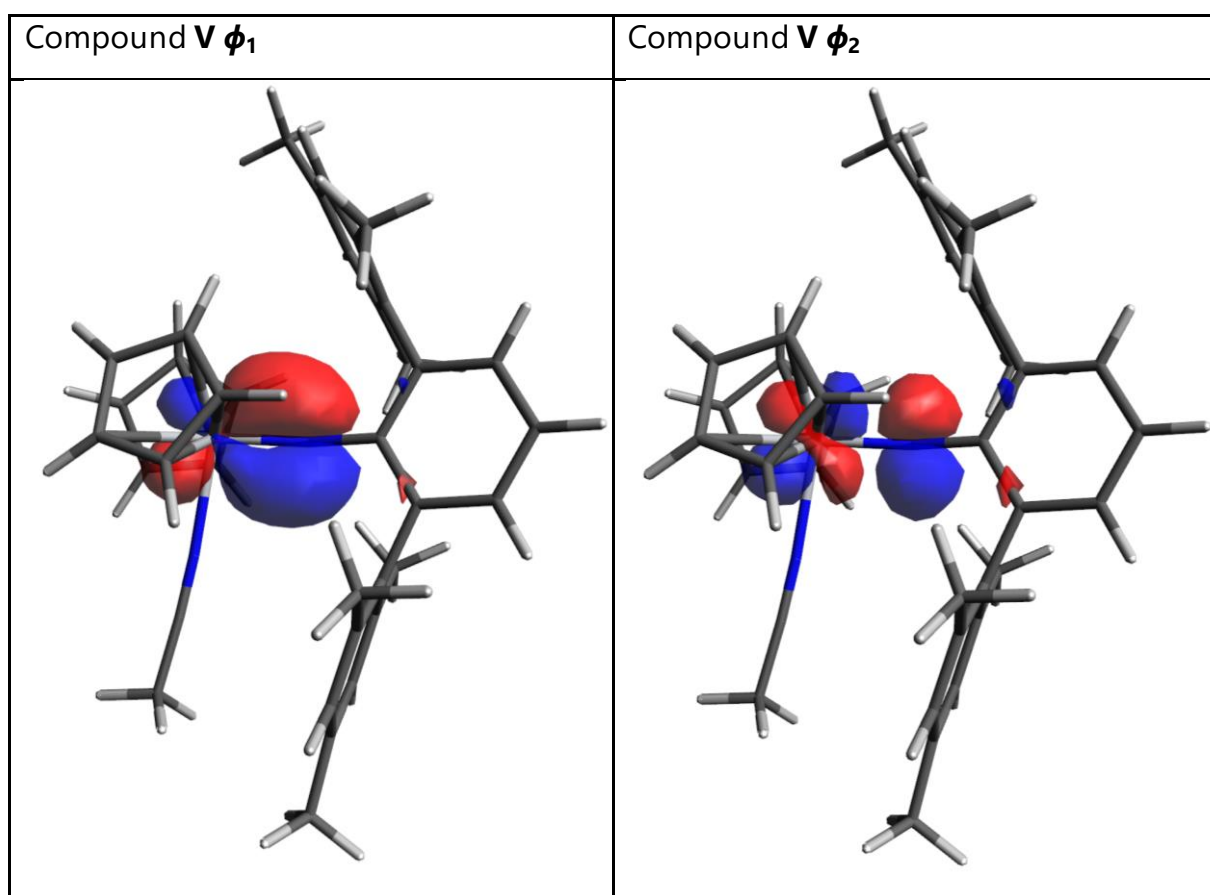

### 5.3.6 Calculation of the theoretical $^{31}\text{P}$ NMR chemical shifts of the phosphorus atoms in $\text{Cp}_2\text{Ti}(\text{PMe}_3)\text{P}^{\text{Mes}}\text{Ter}$ and $\text{Cp}_2\text{Ti}(\text{PMe}_3)\text{As}^{\text{Dip}}\text{Ter}$

Chemical shifts were derived by the GIAO method at the PBE0/def2svp level of theory using the optimized structures from B3LYP/GD3BJ/def2tzvp calculations.<sup>21</sup> The calculated absolute shifts ( $\sigma_{\text{calc},X}$ ) were referenced to the experimental absolute shift of 85%  $\text{H}_3\text{PO}_4$  in the gas phase ( $\sigma_{\text{ref},1} = 328.35$  ppm),<sup>22</sup> using  $\text{PH}_3$  ( $\sigma_{\text{ref},2} = 594.45$  ppm) as a secondary standard:<sup>23</sup>

$$\begin{aligned}\delta_{\text{calc},X} &= (\sigma_{\text{ref},1} - \sigma_{\text{ref},2}) - (\sigma_{\text{calc},X} - \sigma_{\text{calc},\text{PH}_3}) \\ &= \sigma_{\text{calc},\text{PH}_3} - \sigma_{\text{calc},X} - 266.1 \text{ ppm}\end{aligned}$$

At the PBE0/def2-SVP level of theory,  $\sigma_{\text{calc},\text{PH}_3}$  amounts to +629.20 ppm. With these data in hand we were able to calculate the  $^{31}\text{P}$  NMR chemical shifts of the complexes **3** and **5**, which are in reasonable agreement with the experimental values.

**Table S16.** Summary of all calculated  $^{31}\text{P}$  NMR shifts.

| Compound                                                                          | Ti- $\text{PR}_3$                            | Ti- $\text{PR}$                   |
|-----------------------------------------------------------------------------------|----------------------------------------------|-----------------------------------|
| $\text{Cp}_2\text{Ti}(\text{PMe}_3)\text{P}^{\text{Mes}}\text{Ter}$ ( <b>3</b> )  | 404.29 $\rightarrow$ -41.19 ppm              | -799.08 $\rightarrow$ 1162.12 ppm |
| $\text{Cp}_2\text{Ti}(\text{PMe}_3)\text{As}^{\text{Dip}}\text{Ter}$ ( <b>5</b> ) | 402.12 $\rightarrow$ -39.02 ppm              | -                                 |
| Complex II                                                                        | -                                            | 121.76 $\rightarrow$ 241.34 ppm   |
| Complex III                                                                       | 370.47/420.05 $\rightarrow$ -7.37/-56.95 ppm | -280.50 $\rightarrow$ 643.60 ppm  |
| Complex IV                                                                        | 415.49 $\rightarrow$ -52.39 ppm              | -407.41 $\rightarrow$ 770.51 ppm  |

### 5.3.7 Comparison of the experimental and calculated UV/Vis spectra of $\text{Cp}_2\text{Ti}(\text{PMe}_3)\text{P}^{\text{Mes}}\text{Ter}$ and $\text{Cp}_2\text{Ti}(\text{PMe}_3)\text{As}^{\text{Dip}}\text{Ter}$

These calculations were performed to gain a deeper understanding about the colour of the herein described complexes. The calculations were performed on the former described B3LYP/GD3BJ/def2tzvp level of theory considering 40 excited states as well as the scrf approach for THF as solvent. The calculated data were plotted with a half-width of  $2000 \text{ cm}^{-1}$  and normalized to a prominent band of the experimentally

observed spectrum. For the experimental measurement of the UV/Vis spectra of both complexes we diluted approximately 1 mg of complex in 4 mL THF under Ar-atmosphere. Due to the large UV absorption of the terphenyl substituents the spectrum was not well resolved, especially in the UV region, and we diluted the Sample approx. 1:4 (we note that upon dilution a partial decomposition of **3** cannot be ruled out, which might explain the deviation of the calculated and the experimental spectra). Those prepared samples of the compound **3** showed only small shoulders next to the strong UV band in the Vis region from which the  $\lambda_{\text{max}}$  values are difficult to specify. In contrast to this the spectrum of **5** shows two broad absorption maxima at  $\lambda = 652$  and  $474,5$  nm in the Vis region and one further prominent band at  $\lambda = 353,5$  nm which tailed out in the Vis region. These experiments are well in line with the observations by our naked eyes were the color of compound **5** is much more intense compared to complex **3**. As expected, revealed the calculations a more complex excitation behavior for both complexes. The first excitation states ( $\lambda_{\text{EX1}}(\mathbf{3}) = 634$  nm;  $\lambda_{\text{EX1}}(\mathbf{5}) = 652$  nm) can be explained by an excitation by electrons from the highest occupied molecular orbital (HOMO) as well as the HOMO-1 into the lowest unoccupied molecular orbital (LUMO) (**Table S17** and **Table S18**). These both donor molecular orbitals can be best described as titanium – phosphorus/arsenic binding molecular orbitals which together form the Ti=P/As double bond. This is in line with the shape of the acceptor LUMO which can be described as Ti-P/As antibonding molecular orbital. The following 17 excited states, which also possess the HOMO and HOMO-1 as donor molecular orbitals, combine transitions of various LUMO orbitals that can be described mainly as antibonding molecular orbitals of the terphenyl substituents.

**Figure S26:** Plot of the UV/Vis spectra and the calculated oscillator strength of  $\text{Cp}_2\text{Ti}(\text{PMe}_3)\text{P}^{\text{Mes}}\text{Ter}$  (**3**).

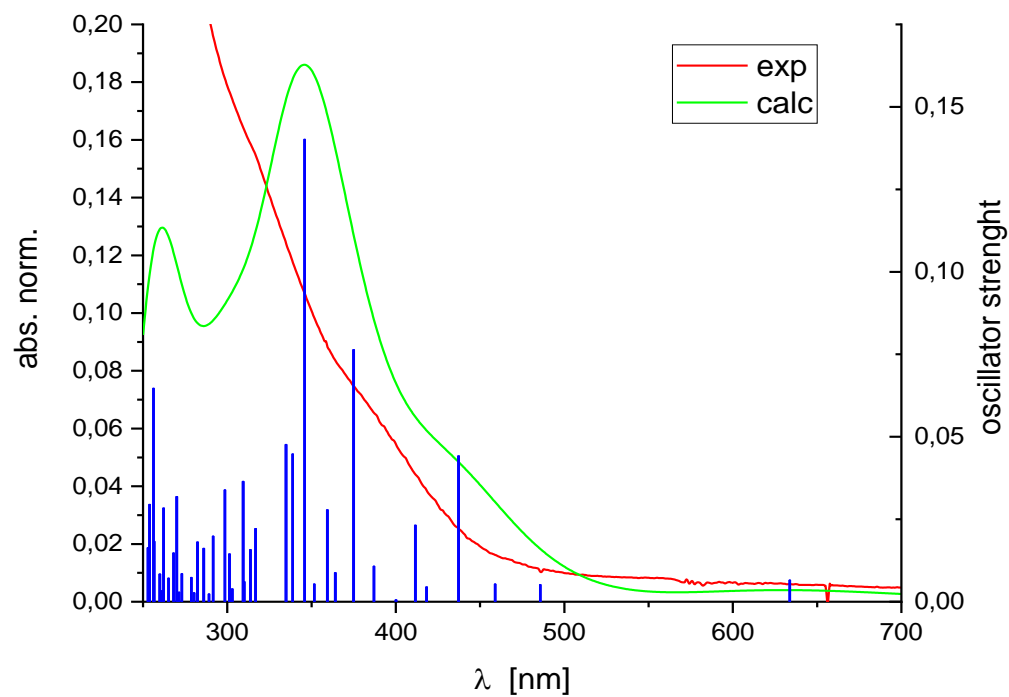

**Figure S27:** Plot of the UV/Vis spectra and the calculated oscillator strength of  $\text{Cp}_2\text{Ti}(\text{PMe}_3)\text{As}^{\text{Dip}}\text{Ter}$  (**5**).

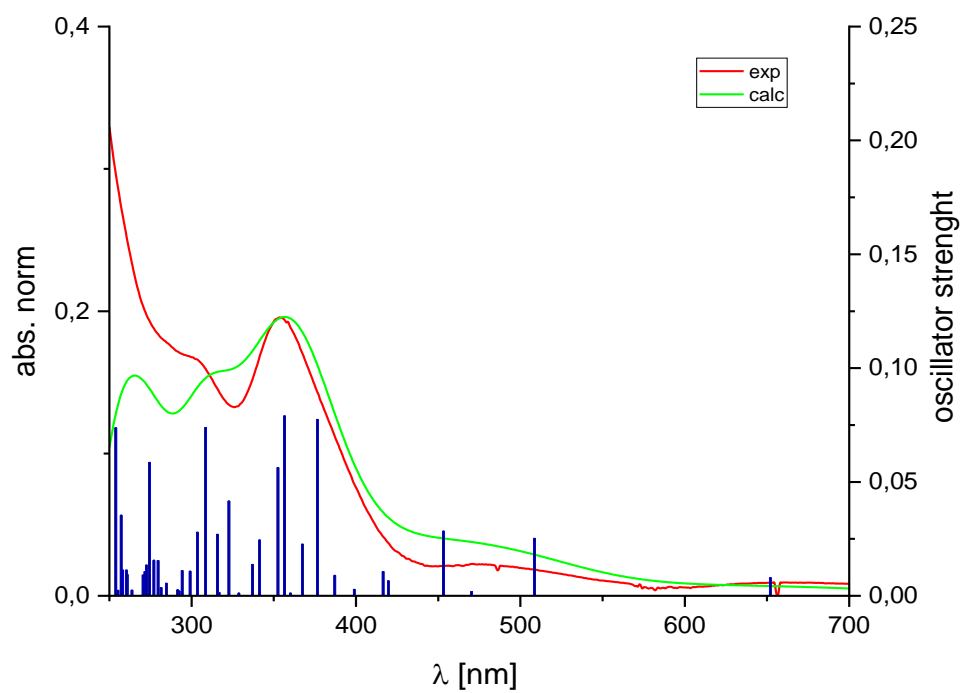

### 5.3.7.1 Report of the first 20 excited states of $\text{Cp}_2\text{Ti}(\text{PMe}_3)\text{P}^{\text{Mes}}\text{Ter}$ (3) and corresponding molecular orbitals

Cp2Ti\_PTer\_PMe\_UV\_old\_THFsolv

```
# b3lyp empiricaldispersion=gd3bjdef2tzvp geom=allcheck guess=readTD
=(Nstates=20) scrf=(pcm,solvent=THF)
```

Excitation energies and oscillator strengths:

Excited State 1: Singlet-A 1.9563 eV 633.77 nm f=0.0065 <S\*\*2>=0.000  
 158 -> 160 0.27486  
 159 -> 160 0.64251

This state for optimization and/or second-order correction.

Total Energy, E(TD-HF/TD-DFT) = -2969.46321641

Copying the excited state density for this state as the 1-particle RhoCI density.

Excited State 2: Singlet-A 2.5526 eV 485.72 nm f=0.0052 <S\*\*2>=0.000  
 158 -> 160 0.46997  
 158 -> 162 0.15559  
 159 -> 160 -0.16282  
 159 -> 161 -0.24648  
 159 -> 162 -0.27666  
 159 -> 163 0.16983  
 159 -> 164 0.17881

Excited State 3: Singlet-A 2.7017 eV 458.92 nm f=0.0054 <S\*\*2>=0.000  
 158 -> 160 0.16145  
 158 -> 162 -0.14499  
 159 -> 161 -0.22928  
 159 -> 162 0.57789  
 159 -> 164 0.19168

Excited State 4: Singlet-A 2.8356 eV 437.23 nm f=0.0442 <S\*\*2>=0.000  
 158 -> 160 0.29699  
 158 -> 161 -0.24843  
 158 -> 162 0.16261  
 158 -> 164 0.17390  
 159 -> 160 -0.12793  
 159 -> 161 0.37792  
 159 -> 162 0.13553  
 159 -> 163 -0.16545  
 159 -> 164 -0.21946

Excited State 5: Singlet-A 2.9642 eV 418.28 nm f=0.0045 <S\*\*2>=0.000  
 158 -> 162 -0.31886  
 158 -> 163 0.12665  
 158 -> 166 -0.18250  
 159 -> 162 -0.14923  
 159 -> 164 0.11282  
 159 -> 165 -0.12407  
 159 -> 166 0.46652  
 159 -> 167 0.14048  
 159 -> 168 0.16460

Excited State 6: Singlet-A 3.0123 eV 411.59 nm f=0.0231 <S\*\*2>=0.000  
 158 -> 162 0.12623  
 158 -> 164 -0.15408  
 159 -> 161 0.36942  
 159 -> 163 0.12085  
 159 -> 164 0.46793  
 159 -> 167 0.18158  
 159 -> 168 -0.11712  
 159 -> 171 -0.10553

Excited State 7: Singlet-A 3.0990 eV 400.07 nm f=0.0006 <S\*\*2>=0.000

|                   |                                                     |
|-------------------|-----------------------------------------------------|
| 158 -> 161        | 0.27164                                             |
| 158 -> 162        | 0.41148                                             |
| 158 -> 163        | -0.16400                                            |
| 158 -> 164        | -0.16635                                            |
| 158 -> 166        | -0.18617                                            |
| 158 -> 168        | -0.15422                                            |
| 159 -> 162        | 0.11071                                             |
| 159 -> 163        | -0.13145                                            |
| 159 -> 166        | 0.26195                                             |
|                   |                                                     |
| Excited State 8:  | Singlet-A 3.2034 eV 387.04 nm f=0.0108 <S**2>=0.000 |
| 158 -> 161        | 0.12026                                             |
| 159 -> 161        | 0.17677                                             |
| 159 -> 162        | 0.13803                                             |
| 159 -> 163        | 0.58890                                             |
| 159 -> 164        | -0.20185                                            |
| 159 -> 165        | -0.13084                                            |
|                   |                                                     |
| Excited State 9:  | Singlet-A 3.3068 eV 374.94 nm f=0.0764 <S**2>=0.000 |
| 158 -> 160        | -0.12535                                            |
| 158 -> 161        | -0.19991                                            |
| 158 -> 162        | 0.27656                                             |
| 158 -> 164        | 0.36995                                             |
| 158 -> 166        | 0.12715                                             |
| 158 -> 167        | 0.15916                                             |
| 159 -> 161        | -0.17638                                            |
| 159 -> 163        | 0.20701                                             |
| 159 -> 166        | 0.21719                                             |
| 159 -> 167        | 0.11816                                             |
|                   |                                                     |
| Excited State 10: | Singlet-A 3.4053 eV 364.09 nm f=0.0088 <S**2>=0.000 |
| 158 -> 161        | 0.11116                                             |
| 158 -> 163        | -0.15365                                            |
| 158 -> 164        | -0.10443                                            |
| 158 -> 165        | -0.16096                                            |
| 158 -> 166        | 0.50576                                             |
| 158 -> 168        | 0.21084                                             |
| 159 -> 165        | -0.17275                                            |
| 159 -> 166        | 0.19879                                             |
| 159 -> 168        | 0.12720                                             |
|                   |                                                     |
| Excited State 11: | Singlet-A 3.4500 eV 359.37 nm f=0.0279 <S**2>=0.000 |
| 158 -> 161        | 0.23049                                             |
| 158 -> 164        | 0.34748                                             |
| 158 -> 165        | 0.10103                                             |
| 158 -> 167        | 0.15075                                             |
| 158 -> 168        | -0.10475                                            |
| 158 -> 171        | -0.10298                                            |
| 159 -> 161        | 0.15772                                             |
| 159 -> 164        | 0.26494                                             |
| 159 -> 165        | -0.17541                                            |
| 159 -> 166        | -0.12541                                            |
| 159 -> 167        | -0.26805                                            |
| 159 -> 168        | 0.15763                                             |
|                   |                                                     |
| Excited State 12: | Singlet-A 3.5261 eV 351.61 nm f=0.0054 <S**2>=0.000 |
| 159 -> 165        | 0.53012                                             |
| 159 -> 166        | 0.24066                                             |
| 159 -> 167        | -0.37938                                            |
|                   |                                                     |
| Excited State 13: | Singlet-A 3.5849 eV 345.85 nm f=0.1401 <S**2>=0.000 |
| 158 -> 161        | 0.39842                                             |
| 158 -> 164        | 0.19611                                             |
| 159 -> 164        | -0.10429                                            |
| 159 -> 165        | 0.27783                                             |
| 159 -> 167        | 0.39156                                             |
|                   |                                                     |
| Excited State 14: | Singlet-A 3.6593 eV 338.82 nm f=0.0448 <S**2>=0.000 |
| 158 -> 161        | -0.22968                                            |
| 158 -> 163        | -0.39894                                            |

|                                                                       |          |
|-----------------------------------------------------------------------|----------|
| 159 -> 165                                                            | 0.12938  |
| 159 -> 166                                                            | -0.14649 |
| 159 -> 167                                                            | 0.15117  |
| 159 -> 168                                                            | 0.43860  |
| Excited State 15: Singlet-A 3.7028 eV 334.84 nm f=0.0477 <S**2>=0.000 |          |
| 158 -> 162                                                            | 0.16808  |
| 158 -> 163                                                            | 0.48763  |
| 158 -> 164                                                            | -0.20105 |
| 159 -> 166                                                            | -0.11076 |
| 159 -> 168                                                            | 0.37451  |
| Excited State 16: Singlet-A 3.9135 eV 316.81 nm f=0.0221 <S**2>=0.000 |          |
| 158 -> 164                                                            | 0.12576  |
| 158 -> 165                                                            | -0.25832 |
| 158 -> 166                                                            | -0.14556 |
| 158 -> 167                                                            | -0.17546 |
| 158 -> 168                                                            | 0.18522  |
| 159 -> 167                                                            | -0.11615 |
| 159 -> 168                                                            | 0.12166  |
| 159 -> 169                                                            | 0.39672  |
| 159 -> 170                                                            | 0.27461  |
| 159 -> 171                                                            | -0.15848 |
| Excited State 17: Singlet-A 3.9519 eV 313.73 nm f=0.0159 <S**2>=0.000 |          |
| 158 -> 165                                                            | 0.30573  |
| 158 -> 166                                                            | 0.15708  |
| 158 -> 168                                                            | -0.12911 |
| 159 -> 169                                                            | 0.55034  |
| Excited State 18: Singlet-A 3.9988 eV 310.05 nm f=0.0061 <S**2>=0.000 |          |
| 154 -> 160                                                            | 0.22555  |
| 156 -> 160                                                            | -0.12730 |
| 157 -> 160                                                            | -0.11742 |
| 158 -> 165                                                            | 0.43631  |
| 158 -> 166                                                            | 0.15026  |
| 158 -> 167                                                            | -0.36207 |
| 159 -> 170                                                            | 0.12930  |
| Excited State 19: Singlet-A 4.0069 eV 309.43 nm f=0.0365 <S**2>=0.000 |          |
| 152 -> 160                                                            | -0.11100 |
| 153 -> 160                                                            | -0.11411 |
| 154 -> 160                                                            | 0.42170  |
| 156 -> 160                                                            | -0.23659 |
| 157 -> 160                                                            | -0.23623 |
| 158 -> 165                                                            | -0.19236 |
| 159 -> 169                                                            | 0.13187  |
| 159 -> 170                                                            | -0.25159 |
| 159 -> 171                                                            | 0.12723  |
| Excited State 20: Singlet-A 4.0928 eV 302.93 nm f=0.0039 <S**2>=0.000 |          |
| 152 -> 160                                                            | 0.11420  |
| 157 -> 160                                                            | 0.14644  |
| 158 -> 165                                                            | 0.19263  |
| 158 -> 166                                                            | -0.21365 |
| 158 -> 167                                                            | 0.15235  |
| 158 -> 168                                                            | 0.52458  |
| 159 -> 170                                                            | -0.19987 |
| 159 -> 171                                                            | 0.12562  |

**Table S17.** Representation of the most important molecular orbitals of **3**.

|              |              |
|--------------|--------------|
| LUMO+7 (167) | LUMO+6 (166) |
|--------------|--------------|

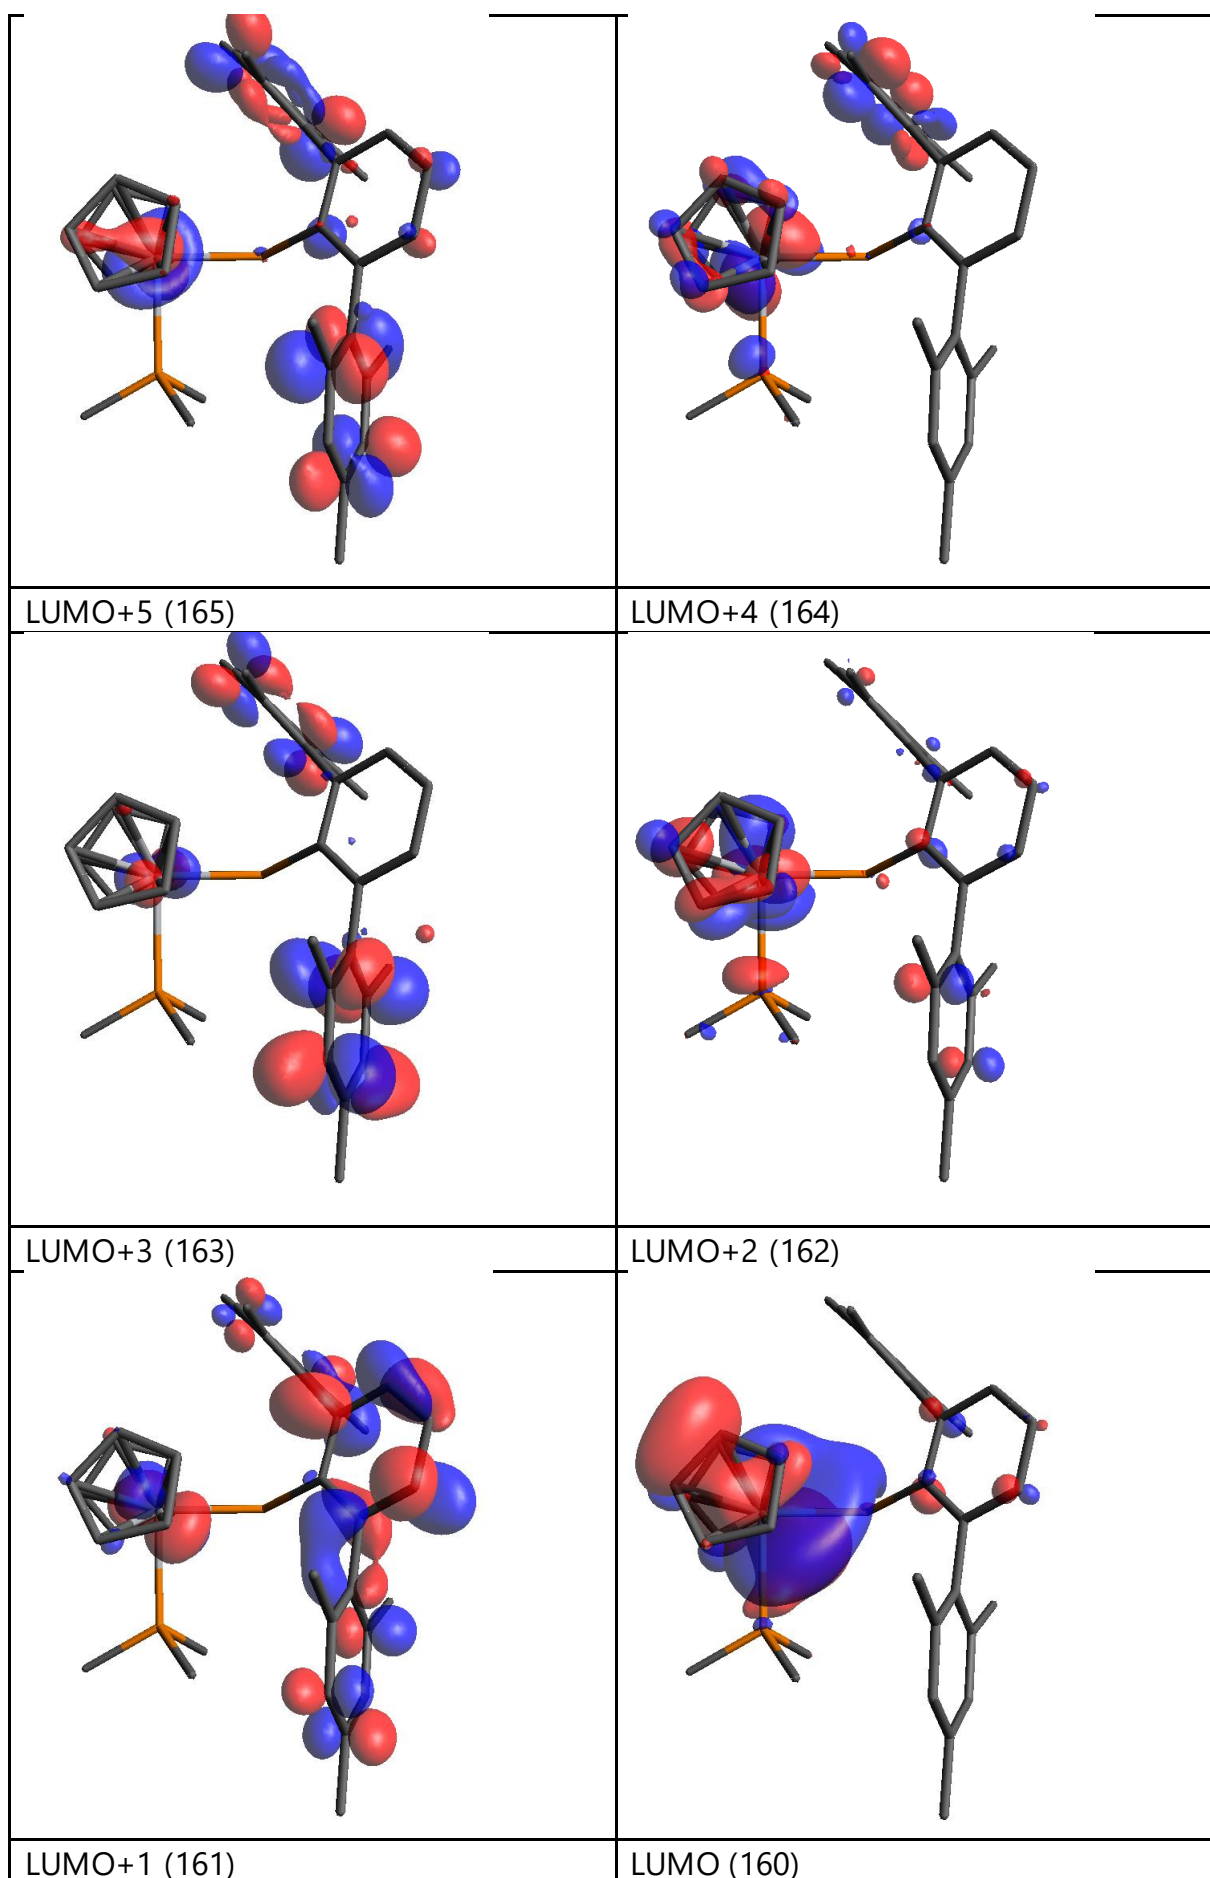

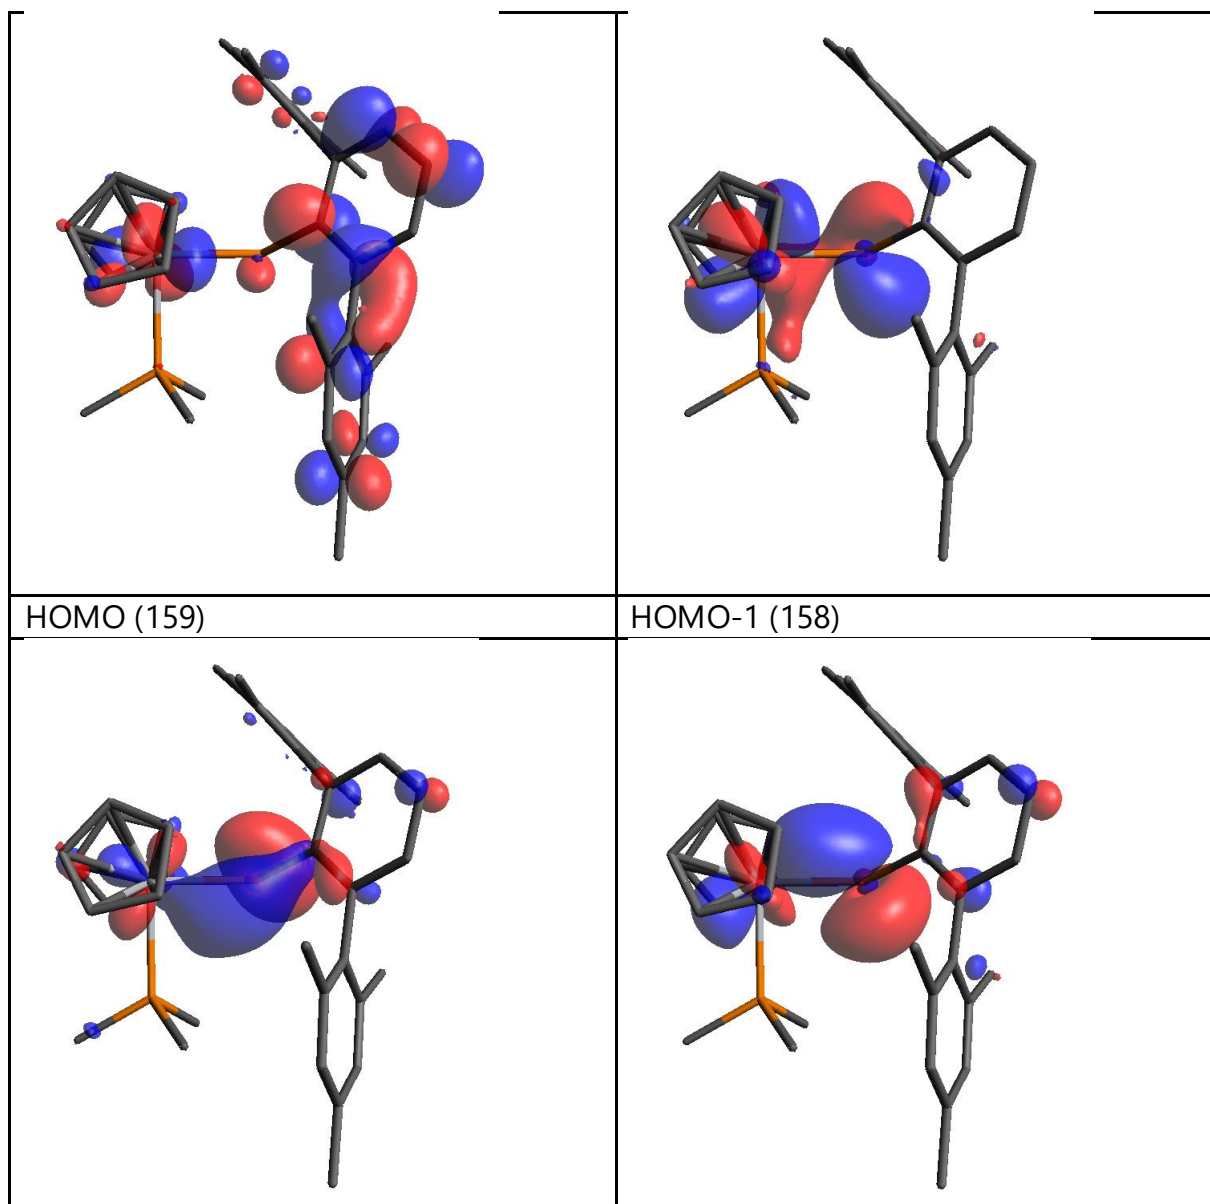

### 5.3.7.2 Report of the first 20 excited states of $\text{Cp}_2\text{Ti}(\text{PMe}_3)\text{As}^{\text{DipTer}}$ (5) and the corresponding molecular orbitals

Cp2Ti\_AsDipTer\_PMe3\_UV\_old\_THFsolv40

# b3lyp empiricaldispersion=gd3bj def2tzvp geom=allcheck guess=read TD  
=(Nstates=40) scrf=(pcm,solvent=THF)

Excitation energies and oscillator strengths:

Excited State 1: Singlet-A 1.9015 eV 652.05 nm f=0.0080 <S\*\*2>=0.000  
191 -> 193 0.39300  
192 -> 193 0.57818

This state for optimization and/or second-order correction.

Total Energy, E(TD-HF/TD-DFT) = -5100.00652260

Copying the excited state density for this state as the 1-particle RhoCl density.

Excited State 2: Singlet-A 2.4378 eV 508.59 nm f=0.0252 <S\*\*2>=0.000  
191 -> 193 0.49960  
192 -> 193 -0.30905  
192 -> 194 0.22975  
192 -> 197 -0.19047

Excited State 3: Singlet-A 2.6358 eV 470.38 nm f=0.0019 <S\*\*2>=0.000  
191 -> 195 -0.14340  
192 -> 194 -0.23205  
192 -> 195 0.63631

Excited State 4: Singlet-A 2.7355 eV 453.24 nm f=0.0284 <S\*\*2>=0.000  
191 -> 193 -0.19366  
191 -> 194 -0.21299  
191 -> 197 0.16918  
192 -> 193 0.14501  
192 -> 194 0.44258  
192 -> 195 0.18222  
192 -> 196 -0.11701  
192 -> 197 -0.29303

Excited State 5: Singlet-A 2.9545 eV 419.64 nm f=0.0066 <S\*\*2>=0.000  
191 -> 195 0.32869  
191 -> 200 -0.17762  
192 -> 200 0.55118  
192 -> 201 0.15498

Excited State 6: Singlet-A 2.9767 eV 416.51 nm f=0.0107 <S\*\*2>=0.000  
192 -> 194 0.32959  
192 -> 197 0.44971  
192 -> 198 0.16042  
192 -> 199 0.32167  
192 -> 201 0.10298

Excited State 7: Singlet-A 3.1074 eV 398.99 nm f=0.0028 <S\*\*2>=0.000  
191 -> 194 0.20456  
191 -> 195 0.49765  
191 -> 197 -0.21154  
191 -> 200 0.19063  
191 -> 201 0.12633  
192 -> 195 0.11808  
192 -> 200 -0.25719

Excited State 8: Singlet-A 3.2029 eV 387.10 nm f=0.0090 <S\*\*2>=0.000  
191 -> 194 0.16094  
192 -> 194 0.19913  
192 -> 196 0.61028  
192 -> 199 -0.13958

Excited State 9: Singlet-A 3.2927 eV 376.55 nm f=0.0775 <S\*\*2>=0.000  
191 -> 194 0.29297  
191 -> 195 -0.18912  
191 -> 197 -0.17149  
191 -> 199 -0.11290  
192 -> 194 0.18856  
192 -> 196 -0.28685  
192 -> 197 0.16987  
192 -> 198 -0.23253  
192 -> 199 -0.21100  
192 -> 200 0.15037  
192 -> 201 -0.12127  
192 -> 203 -0.13319

Excited State 10: Singlet-A 3.3750 eV 367.36 nm f=0.0227 <S\*\*2>=0.000  
191 -> 194 -0.15055  
191 -> 195 0.13496  
191 -> 197 0.28406  
191 -> 198 0.10153  
191 -> 199 0.22818  
191 -> 203 0.10562

|                                                                       |          |  |  |
|-----------------------------------------------------------------------|----------|--|--|
| 192 -> 193                                                            | -0.10111 |  |  |
| 192 -> 197                                                            | 0.34556  |  |  |
| 192 -> 198                                                            | -0.22459 |  |  |
| 192 -> 199                                                            | -0.26449 |  |  |
| Excited State 11: Singlet-A 3.4425 eV 360.16 nm f=0.0012 <S**2>=0.000 |          |  |  |
| 191 -> 197                                                            | 0.11080  |  |  |
| 191 -> 199                                                            | 0.12640  |  |  |
| 191 -> 200                                                            | 0.58155  |  |  |
| 191 -> 201                                                            | 0.18659  |  |  |
| 192 -> 200                                                            | 0.23980  |  |  |
| Excited State 12: Singlet-A 3.4778 eV 356.50 nm f=0.0790 <S**2>=0.000 |          |  |  |
| 191 -> 194                                                            | 0.40401  |  |  |
| 191 -> 197                                                            | 0.32403  |  |  |
| 191 -> 199                                                            | 0.16158  |  |  |
| 192 -> 196                                                            | -0.11148 |  |  |
| 192 -> 198                                                            | 0.38380  |  |  |
| Excited State 13: Singlet-A 3.5166 eV 352.57 nm f=0.0563 <S**2>=0.000 |          |  |  |
| 191 -> 194                                                            | -0.26951 |  |  |
| 191 -> 197                                                            | -0.18335 |  |  |
| 192 -> 198                                                            | 0.46089  |  |  |
| 192 -> 199                                                            | -0.36531 |  |  |
| Excited State 14: Singlet-A 3.6321 eV 341.36 nm f=0.0245 <S**2>=0.000 |          |  |  |
| 191 -> 194                                                            | 0.10535  |  |  |
| 191 -> 196                                                            | 0.53926  |  |  |
| 191 -> 199                                                            | -0.11860 |  |  |
| 192 -> 199                                                            | -0.21807 |  |  |
| 192 -> 201                                                            | 0.31188  |  |  |
| Excited State 15: Singlet-A 3.6785 eV 337.05 nm f=0.0138 <S**2>=0.000 |          |  |  |
| 191 -> 196                                                            | -0.41403 |  |  |
| 191 -> 197                                                            | 0.15713  |  |  |
| 191 -> 198                                                            | -0.11052 |  |  |
| 191 -> 199                                                            | -0.11044 |  |  |
| 192 -> 199                                                            | -0.20039 |  |  |
| 192 -> 201                                                            | 0.42427  |  |  |
| Excited State 16: Singlet-A 3.7710 eV 328.78 nm f=0.0012 <S**2>=0.000 |          |  |  |
| 192 -> 201                                                            | 0.19205  |  |  |
| 192 -> 202                                                            | 0.64626  |  |  |
| 192 -> 203                                                            | -0.14998 |  |  |
| Excited State 17: Singlet-A 3.8423 eV 322.68 nm f=0.0416 <S**2>=0.000 |          |  |  |
| 189 -> 193                                                            | 0.13986  |  |  |
| 191 -> 197                                                            | -0.23927 |  |  |
| 191 -> 198                                                            | 0.45516  |  |  |
| 191 -> 199                                                            | 0.18297  |  |  |
| 192 -> 201                                                            | 0.21968  |  |  |
| 192 -> 202                                                            | -0.20683 |  |  |
| 192 -> 203                                                            | -0.19227 |  |  |
| Excited State 18: Singlet-A 3.9145 eV 316.73 nm f=0.0015 <S**2>=0.000 |          |  |  |
| 189 -> 193                                                            | -0.14141 |  |  |
| 191 -> 198                                                            | 0.47422  |  |  |
| 191 -> 199                                                            | -0.25352 |  |  |
| 192 -> 201                                                            | -0.13235 |  |  |
| 192 -> 202                                                            | 0.10060  |  |  |
| 192 -> 203                                                            | 0.34467  |  |  |
| Excited State 19: Singlet-A 3.9264 eV 315.77 nm f=0.0270 <S**2>=0.000 |          |  |  |
| 189 -> 193                                                            | 0.48095  |  |  |
| 190 -> 193                                                            | -0.18031 |  |  |
| 191 -> 199                                                            | 0.17382  |  |  |
| 192 -> 199                                                            | -0.10153 |  |  |
| 192 -> 201                                                            | -0.10333 |  |  |
| 192 -> 202                                                            | 0.10304  |  |  |
| 192 -> 203                                                            | 0.33920  |  |  |

Excited State 20: Singlet-A 4.0184 eV 308.54 nm f=0.0739 <S\*\*2>=0.000

|            |          |
|------------|----------|
| 189 -> 193 | -0.28460 |
| 190 -> 193 | 0.19534  |
| 191 -> 197 | -0.19868 |
| 191 -> 199 | 0.44391  |
| 191 -> 201 | -0.10812 |
| 191 -> 203 | -0.11551 |
| 192 -> 203 | 0.23449  |

**Table S18.** Representation of the most important molecular orbitals of **5**.

|                                                                                     |                                                                                      |
|-------------------------------------------------------------------------------------|--------------------------------------------------------------------------------------|
| LUMO+7 (167)                                                                        | LUMO+6 (166)                                                                         |
| 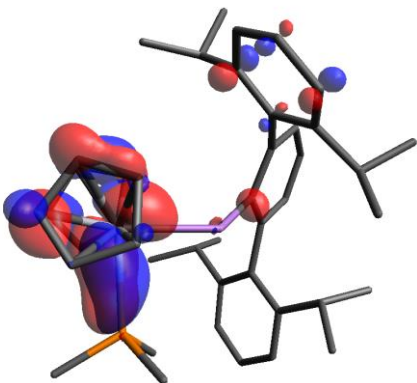   | 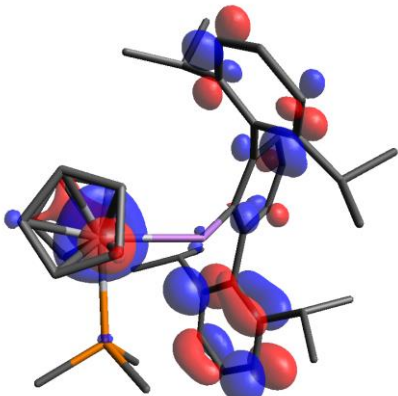   |
| LUMO+5 (165)                                                                        | LUMO+4 (164)                                                                         |
| 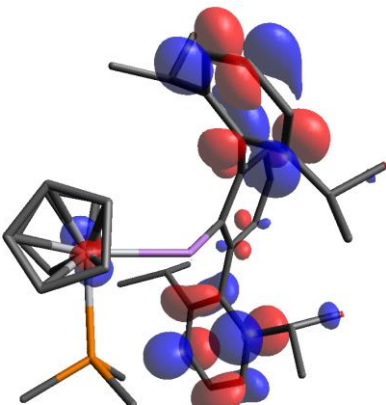  | 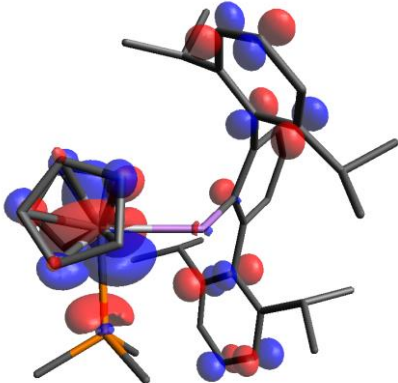  |
| LUMO+3 (163)                                                                        | LUMO+2 (162)                                                                         |
| 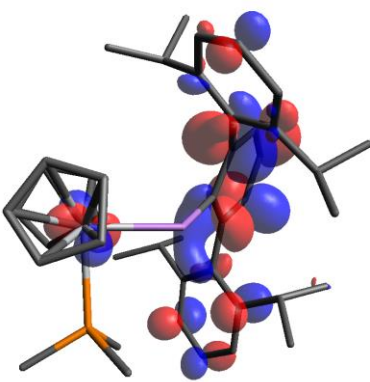 | 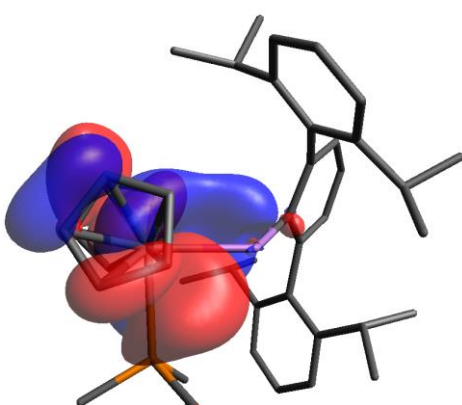 |
| LUMO+1 (161)                                                                        | LUMO (160)                                                                           |
|  |  |

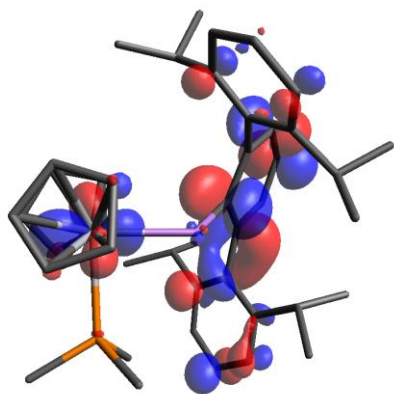

HOMO (159)

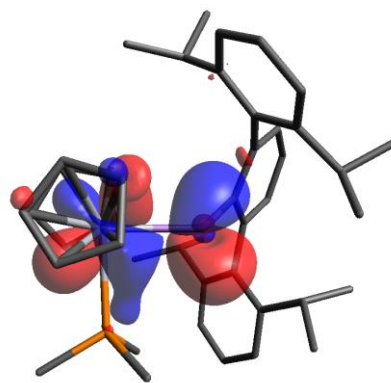

HOMO-1 (158)

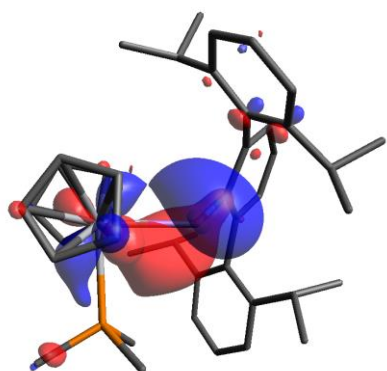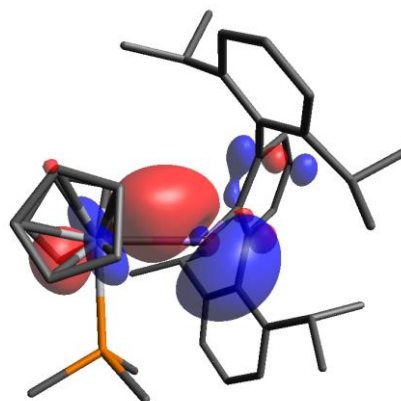

## 6 References

- 1 M. Fischer, L. Vincent-Heldt, M. Hillje, M. Schmidtman and R. Beckhaus, *Dalton Trans.* **2020**, 49, 2068-2072
- 2 P. Gupta, J.-E. Siewert, T. Wellnitz, M. Fischer, W. Baumann, T. Beweries and C. Hering-Junghans, *Dalton Trans.* **2021**, 50, 1838-1844.
- 3 M. Fischer, S. Nees, T. Kupfer, J. T. Goettel, H. Braunschweig and C. Hering-Junghans *J. Am. Chem. Soc.* **2021**,  
<http://dx.doi.org/10.1021/jacs.1c00204>.
- 4 G. M. Sheldrick, *Acta Cryst. A* **2015**, 71, 3–8.
- 5 G. M. Sheldrick, *Acta Cryst. C* **2015**, 71, 3–8.
- 6 G. M. Sheldrick, *SADABS Version 2*, University of Göttingen, Germany, **2004**.
- 7 A. L. Spek, *Acta Cryst.* **2015**, C71, 9–18
- 8 *Gaussian 16, Revision C.01*, M. J. Frisch, G. W. Trucks, H. B. Schlegel, G. E. Scuseria, M. A. Robb, J. R. Cheeseman, G. Scalmani, V. Barone, G. A. Petersson, H. Nakatsuji, X. Li, M. Caricato, A. V. Marenich, J. Bloino, B. G. Janesko, R. Gomperts, B. Mennucci, H. P. Hratchian, J. V. Ortiz, A. F. Izmaylov, J. L. Sonnenberg, D. Williams-Young, F. Ding, F. Lipparini, F. Egidi, J. Goings, B. Peng, A. Petrone, T. Henderson, D. Ranasinghe, V. G. Zakrzewski, J. Gao, N. Rega, G. Zheng, W. Liang, M. Hada, M. Ehara, K. Toyota, R. Fukuda, J. Hasegawa, M. Ishida, T. Nakajima, Y. Honda, O. Kitao, H. Nakai, T. Vreven, K. Throssell, J. A. Montgomery, Jr., J. E. Peralta, F. Ogliaro, M. J. Bearpark, J. J. Heyd, E. N. Brothers, K. N. Kudin, V. N. Staroverov, T. A. Keith, R. Kobayashi, J. Normand, K. Raghavachari, A. P. Rendell, J. C. Burant, S. S. Iyengar, J. Tomasi, M. Cossi, J. M. Millam, M. Klene, C. Adamo, R. Cammi, J. W. Ochterski, R. L. Martin, K. Morokuma, O. Farkas, J. B. Foresman, and D. J. Fox, Gaussian, Inc., Wallingford CT, **2016**.
- 9 a) E. D. Glendening, J. K. Badenhoop, A. E. Reed, J. E. Carpenter, J. A. Bohmann, C. M. Morales, C. R. Landis and F. Weinhold, *NBO 6.0*, Theoretical Chemistry Institute, University of Wisconsin, Madison, **2013**; b) J. E. Carpenter and F. Weinhold, *J. Mol. Struct.: THEOCHEM* **1988**, 169, 41–62; c) F. Weinhold and J. E. Carpenter, *The Structure of Small Molecules and Ions*, Plenum Press, **1988**; d) F.

- 
- Weinhold and C. R. Landis, *Valency and Bonding. A Natural Bond Orbital Donor-Acceptor Perspective*, Cambridge University Press, **2005**.
- 10 a) A. D. Becke, *Phys. Rev. A* **1988**, 38, 3098–3100; b) J. P. Perdew, *Phys. Rev. B* **1986**, 33, 8822–8824.
- 11 a) S. H. Vosko, L. Wilk and M. Nusair, *Can. J. Phys.* **1980**, 58, 1200–1211; b) C. Lee, W. Yang and R. G. Parr, *Phys. Rev. B* **1988**, 37, 785–789; c) B. Miehlich, A. Savin, H. Stoll and H. Preuss, *Chem. Phys. Lett.* **1989**, 157, 200–206; d) A. D. Becke, *J. Chem. Phys.* **1993**, 98, 5648–5652.
- 12 F. Weigend and R. Ahlrichs, *Phys. Chem. Chem. Phys.* **2005**, 7, 3297–3305.
- 13 a) S. Grimme, J. Antony, S. Ehrlich and H. Krieg, *J. Chem. Phys.* **2010**, 132, 154104; b) S. Grimme, S. Ehrlich and L. Goerigk, *J. Comput. Chem.* **2011**, 32, 1456–1465.
- 14 T. Lu and F. Chen, *J. Comput. Chem.* **2012**, 33, 580.
- 15 GaussView, Version 6.1, Roy Dennington, Todd A. Keith, and John M. Millam, Semichem Inc., Shawnee Mission, KS, **2016**
- 16 a) R. F. W. Bader, *Acc. Chem. Res.* **1985**, 18, 9–15; b) R. F. W. Bader, *Chem. Rev.* **1991**, 91, 893–928; c) R. F. W. Bader, *Atoms in Molecules: A Quantum Theory*, Oxford University Press, **1994**; d) R. F. W. Bader, *Monatsh. Chem.* **2005**, 136, 819–854.
- 17 a) C. J. Cramer, *Essentials of Computational Chemistry: Theories and Models*, John Wiley & Sons, Ltd, Chichester, UK, **2004**; b) L. Salem and C. Rowland, *C. Angew. Chem. Int. Ed. Engl.* **1972**, 11, 92–111; c) J.-P. Malrieu and G. Trinquier, *J. Phys. Chem. A* **2012**, 116, 8226–8237.
- 18 E. Miliordos, K. Ruedenberg and S. S. Xantheas, *S. S. Angew. Chem. Int. Ed.* **2013**, 52, 5736–5739.
- 19 a) L. Noodleman, *J. Chem. Phys.* **1981**, 74, 5737–5743; b) D. Herebian, K. E. Wieghardt and F. Neese, *J. Am. Chem. Soc.* **2003**, 125, 10997–11005; c) M. Abe, *Chem. Rev.* **2013**, 113, 7011–7088.
- 20 G. Zhao, F. Basuli, U. J. Kilgore, H. Fan, H. Aneetha, J. C. Huffman, G. Wu and D. J. Mindiola, *J. Am. Chem. Soc.* **2006**, 128, 13575–13585.
- 21 a) F. London, *J. Phys. Radium* **1937**, 8, 397–409; b) R. McWeeny, *Phys. Rev.* **1962**, 126, 1028–1034; c) R. Ditchfield, *Mol. Phys.* **1974**, 27, 789–807; d) K. Wolinski, J. F. Hinton and P. Pulay, *J. Am. Chem. Soc.* **1990**, 112, 8251–8260; e) J. R.

- 
- Cheeseman, G. W. Trucks, T. A. Keith and M. J. Frisch, *J. Chem. Phys.* **1996**, *104*, 5497–5509.
- 22 C. J. Jameson, A. De Dios and A. Keith Jameson, *Chem. Phys. Lett.* **1990**, *167*, 575–582.
- 23 C. van Wüllen, *Phys. Chem. Chem. Phys.* **2000**, *2*, 2137–2144.
